# Supplementary material for: Machine learning assisted interfacial catalysis of metal-oxide nanocatalysts in CO2 hydrogenation
Source: Research Square preprint supplement (doi:10.21203/rs.3.rs-5884355/v1), 2025-02-05
Supplement: Supplementary file 1 [file 425c0080a19c167ec4d1adad.docx]

Supporting Information

**Machine learning assisted interfacial catalysis of metal-oxide nanocatalysts in CO2 hydrogenation**

Dandan Ren,1,2,# Mei Hong,1,# Ruiying Li,1,# Yuwei Zhou,3,# Chenke Li,2 Jieqiong Ding,4 Fei Wang,1 Xingchen Liu,1* Weixin Huang,4 Xiaodong Wen,1* and Zhenhua Zhang1*

1 State Key Laboratory of Coal Conversion, Institute of Coal Chemistry, Chinese Academy of Sciences, Taiyuan 030001, People’s Republic of China.

2 Key Laboratory of the Ministry of Education for Advanced Catalysis Materials, Zhejiang Key Laboratory for Reactive Chemistry on Solid Surfaces, Institute of Physical Chemistry, Zhejiang Normal University, Jinhua 321004, People’s Republic of China.

3 National Energy Center for Coal to Liquids, Synfuels China Co., Ltd., Huairou District, Beijing 101400, People’s Republic of China.

4 Key Laboratory of Precision and Intelligent Chemistry, iChEM, Key Laboratory of Surface and Interface Chemistry and Energy Catalysis of Anhui Higher Education Institutes and School of Chemistry and Materials Science, Hefei National Research Center for Physical Sciences at the Microscale, University of Science and Technology of China, Hefei 230026, People’s Republic of China.

# These authors contributed equally.

*To whom should be addressed: [liuxingchen@sxicc.ac.cn](mailto:liuxingchen@sxicc.ac.cn) (X. L.); [wxd@sxicc.ac.cn](mailto:wxd@sxicc.ac.cn) (X. W.); [zhangzh@sxicc.ac.cn](mailto:zhangzh@sxicc.ac.cn) (Z. Z).

**CONTENTS**

A. Supporting Experimental Sections…………………………………………….… 3

1. Characterization of catalysts…………………………………..……………... 3

2. Machine learning analysis………………………………………….………... 7

3. DFT simulations…………………………………………………...………… 10

B. Supporting Weisz-Prater Criterion/Mears’ Criterion Calculations…………….… 14

1. Mass transfer limitations: Internal diffusion……………………………….... 14

2. Mass transfer limitations: External diffusion………………………………... 14

3. External (Interphase) heat transfer…………………………………………... 15

C. Supporting Figures and Tables………………………………………….….……. 17

D. Supporting References…………………………………………………………... 48

**A. Supporting Experimental Sections**

**1. Characterization of catalysts**

Power X-ray diffraction (XRD) patterns of CeO2 support and fresh/used Pd/CeO2 catalysts were collected in a Bruker D8 Advance diffractometer with a nickel-filtered Cu Kα (k = 0.15418 nm) radiation source operated with an operation current of 50 mA and an operation voltage of 40 kV. Prior to measurement, a certain amount of powder sample was loaded in the circle sample cell and then tested in a scan rate of 0.1o s-1 from 20o to 80o to acquire the XRD patterns. The crystalline structures were analyzed by the crystallographic data base (PDF-4+) with a program JADE 6.5.

X-ray photoelectron spectroscopy (XPS) without exposure to air were performed on an ESCALAB 250Xi instrument with a monochromatized Al Kα (hυ = 1486.7 eV) excitation source. Prior to measurement, the calcined sample was in situ reduced by pure H2 with a flow rate of 30 mL min−1 at 350 °C for 2 h in a high-pressure reactor and then cooled to room temperature. Afterwards, the sample was transferred to the ultra-high vacuum chamber (background pressure = 3×10-9 mbar) for the XPS measurements without exposures to air. The likely charging of sample was corrected by setting the binding energy of the adventitious carbon (C 1s) to 284.8 eV.

The Pd content in the Pd/CeO2 catalyst was measured by an Optima 7300DV inductively coupled plasma atomic emission spectrometer or mass spectroscopy (ICP-AES/MS). Prior to measurement, as-prepared Pd/CeO2 catalyst was dissociated into aqua regia (HCl/HNO3 = 3:1) for overnight and then the solution was diluted with deionized water to a desired volume before analysis of Pd content.

Laser Raman spectra of CeO2 support and Pd/CeO2 catalysts were collected by a LABRAM-HR Confocal Laser Raman spectrometer with the excitation lines at 532 nm and 325 nm, denoted as UV-Raman and Vis-Raman, respectively. Prior to measurement, a certain amount of powder sample was loaded in the sample cell and subsequently measured to acquire the Raman spectra.

The aberration-corrected high-angle annular dark-field (HAADF) scanning transmission electron microscopy (STEM) images for fresh and used 0.1%Pd/CeO2 catalysts were taken on a NION STEM100 at 60 kV equipped with monochromator, aberration corrector, and Gatan Enfinium spectrometer. Transmission electron microscopy (TEM) and high-resolution transmission electron microscopy (HRTEM) images of fresh and used 2%&8%Pd/CeO2 catalysts were taken on a JEM-2100F high resolution transmission electron microscope. Prior to measurement, the sample was dispersed into absolute ethanol and subsequently loaded on ultrathin carbon membrane before analysis. The Pd particle size was analyzed by counting no less than 200 particles in the TEM images.

H2 temperature-programmed reduction (H2-TPR), CO titration, and CO2 temperature-programmed desorption (CO2-TPD) experiments were conducted on VDSorb-90i instrument (Quzhou Vodo Machinery Technology Co., Ltd.) equipped with a thermal conductivity detector (TCD). For the H2-TPR experiments, 50 mg of as-prepared CeO2 support and calcined Pd/CeO2 catalysts were loaded in a U-shape quartz microreactor and then heated at an increasing rate of 5 °C min-1 up to 600 °C under 5% H2/Ar atmosphere with a flow rate of 30 mL min-1. A trap containing KOH was used to move water from the stream prior to TCD. The H2 consumption was recorded by the TCD detector.

For the CO titration experiments, 100 mg of calcined catalyst was loaded in a U-shape quartz microreactor and then in situ reduced by pure H2 with a flow rate of 30 mL min−1 at 350 °C for 2 h to acquire the Pd/CeO2 catalyst. Afterwards, He was transferred into the reactor with a flow rate of 30 mL min-1 at 350 °C for another 1 h and then cooled down to room temperature naturally. The CO titration experiment was conducted with a CO pulse size of 0.52 mL at room temperature by exposing into 5% CO/He with at least 20 pulses till no CO adsorption observed and the signals were detected by a TCD detector.

For the CO2-TPD experiments, 100 mg of calcined catalyst was loaded in a U-shape quartz microreactor and then in situ reduced by pure H2 with a flow rate of 30 mL min−1 at 350 °C for 2 h to acquire the Pd/CeO2 catalyst. Afterwards, the system was transferred into pure He with a flow rate of 30 mL min-1 and purged for another 0.5 h. Next, the system was cooled down to room temperature naturally and then exposed into pure CO2 atmosphere with a flow rate of 30 mL min-1 for 1 h until CO2 chemisorbed saturably. After that, pure He with a flow rate of 30 mL min-1 was introduced again and purged for additional 0.5 h. Finally, the resulting sample was heated at a rate of 5 oC min-1 in pure He with a flow rate of 30 mL min-1 and the CO2 desorption signal was recorded by a TCD detector. A trap containing frozen isopropanol was used to move water from the stream prior to TCD.

In situ diffuse reflectance infrared Fourier transformed spectroscopy (DRIFTS) experiments were carried out on a Nicolet iS50 FT-IR spectrometer equipped with an in situ DRIFTS reaction cell and an MCT/A detector in series mode with 256 scans and a resolution of 4 cm-1. Prior to measurements, 50 mg of calcined catalyst was loaded in the reaction cell and then in situ reduced by pure H2 with a flow rate of 30 mL min−1 at 350 °C for 2 h to acquire the Pd/CeO2 catalyst. For in situ DRIFTS of CO chemisorption experiments, the acquired Pd/CeO2 catalyst was purged by high-pure N2 with a flow rate of 30 mL min-1 at room temperature for 0.5 h, whose spectra was recorded as the background spectra. Afterwards, the atmosphere was transferred to 10% CO/N2 with a flow rate of 30 mL min-1 for 0.5 h till saturation, whose spectra was recorded. Finally, the sample was further purged by high-pure N2 with a flow rate of 30 mL min-1 at room temperature and the spectra were serially recorded during N2 purge for 40 min.

For in situ DRIFTS experiments of the Pd/CeO2 catalysts under working conditions, the reduced Pd/CeO2 catalyst was purged by high-pure N2 with a flow rate of 30 mL min-1 at 400 oC for 1 h, whose spectra was recorded as the background spectra. Afterwards, the atmosphere was transferred to 13.3% CO2 and 53.2% H2 balanced with N2 with a flow rate of 30 mL min-1 for 30 min till saturation, whose spectra was recorded.

For in situ DRIFTS experiments in the stepwise reactions, the reduced Pd/CeO2 catalyst was purged by high-pure N2 with a flow rate of 30 mL min-1 at 400 oC for 1 h, whose spectra was recorded as the background spectra. Afterwards, the atmosphere was transferred to 13.3% CO2/N2 with a flow rate of 30 mL min-1 and the time-resolved spectra were serially recorded for 30 min. Next, H2 was introduced in the presence of CO2 with a mixed atmosphere of 13.3% CO2 and 53.2% H2 balanced with N2 with a flow rate of 30 mL min-1 at 400 oC and the time-resolved spectra were serially recorded for 30 min.

**2. Machine learning analysis**

The first set of experiments generated 336 data samples, encompassing compositions with seven metal promoters (Rh, Ni, Cu, Pd, Pt, Co and Ru) and two supports (CeO2​ and Al2​O3​). Each support contributed 168 data samples. The processing parameters included metal loadings, ranging from 0.1% to 1.0% by mass weight, and reaction temperatures, spanning 210 °C to 350 °C. Catalytic performance was evaluated using indicators such as CO2​ conversion, CH4​ selectivity, and CO selectivity. To assess overall catalytic performance, we defined a new indicator - YieldCO, calculated using the following formula, serving as the target variable:

*YieldCO = (F.R. × Conc.CO2 × Conv.,CO2 × SCO) / (MassCat. × WM*)

where *F.R.* represents the total flow rate of CO2 hydrogenation reaction; *Conc.CO2* represents the percentage of CO2 in the total reaction atmosphere; *Conv.,CO2* represents the CO2​ conversion; *SCO* specifies the CO selectivity; *MassCat.* represents the mass of catalyst; *WM* denotes the metal loading by weight. A high *YieldCO* value indicates superior performance of the catalyst in CO2 hydrogenation to CO, normalized by the metal loading.

We employed machine learning to establish a quantitative relationship between catalyst formulation (including the type of supported metal, support material, and metal loading), reaction conditions (temperature), and catalytic performance, specifically CO yield. One-hot encoding (OHE) was used to represent the categorical variables for metals and supports, while retaining the original experimental data for metal loadings and reaction temperatures. Feature correlation analysis was performed using the Pearson correlation coefficient. To model the relationship between composition, processing parameters, and catalytic performance, we employed an artificial neural network (ANN) algorithm. The ANN architecture consisted of two hidden layers with 5 and 5 neurons, respectively, both utilizing the ReLU activation function. An L2-regularization coefficient (*α*) of 0.001 was applied, and data normalization was conducted using the MinMax scaling algorithm. Weight optimization was performed using the LBFGS algorithm with a maximum of 200 iterations. The dataset was split into training (80%) and testing (20%) subsets, and all model training and evaluation were implemented using the scikit-learn (v1.3.2) package.

For CeO2​ supported catalysts, additional 46 samples were prepared and tested to validate the accuracy of the model. With the surrogate ANN model, the catalytic performance of Pd supported on CeO2​ and Al2​O3​ could be predicted continuously across a wide range of metal loadings and reaction temperatures.

To further investigate the correlation between catalyst performance and the intrinsic electronic and structural properties of the catalysts, we constructed several features, including εd,p (eV), εd,m (eV), de,p (|e|), de,avg,m (|e|), de,sum,m (|e|), Qp (|e|), Qavg,m (|e|), Qsum,m (|e|), CNp, and CNm. Corresponding implications were listed below:

| Implication | Symbolic |
| --- | --- |
| d-states' center of pristine metal atom | εd,p |
| d-states' center of metal atom in the model | εd,m |
| The electron numbers of d orbital of pristine metal atom | de,p |
| The average electron numbers of d orbital of metal atom in the model | de,avg,m |
| The sum electron numbers of d orbital of metal atom in the model | de,sum,m |
| Bader charge transfer of pristine metal atom | Qp |
| Average bader charge, charge transfer of metal atom in the model | Qavg,m |
| Sum of bader charge, charge transfer of metal atom in the model | Qsum,m |
| Coordination number of metal atom in the crystal model | CNp |
| Coordination number of metal atom in the model | CNm |

We employed the XGBoost method to develop a quantitative predictive model correlating CO yield with the constructed features and reaction temperature (T). XGBoost (eXtreme Gradient Boosting) is an ensemble learning algorithm based on gradient boosting decision trees, which combines multiple weak learners (decision trees) into a strong learner. This method iteratively adds decision trees, with each tree correcting the errors of the previous ones, thereby progressively reducing the overall error.

The 214 experimental samples were randomly divided into training and test sets with an 80:20 ratio, using a random seed of 789. The XGBoost regression model was constructed with 100 trees, a maximum depth of 6 for each tree, and an L1 regularization coefficient of 0.1, while other parameters were set to their default values. The resulting model achieved Mean Absolute Deviation (MAD), Root Mean Square (RMS), and R-squared (R²) values of 0.2754, 0.5297, and 0.98 on the training set, and 0.4229, 0.5833, and 0.96 on the test set.

To further interpret the model, we applied the SHAP (SHapley Additive exPlanations) method, which is based on Shapley value theory from game theory. SHAP decomposes the model's predictions into contributions from individual features, providing insights into the decision-making process of complex models. A SHAP explainer was constructed for the XGBoost model using the training data, and SHAP values were calculated for the test set. The contributions of each feature to the predicted output were visualized using a bar chart.

**3. DFT simulations**

Density functional theory (DFT) calculations were performed using the Perdew-Burke–Ernzerhof (PBE) functional1, as implemented in the Vienna Ab Initio Simulation Package (VASP)2-4, To account for strong electron correlations, a Hubbard U correction (DFT+U) was applied using the rotationally invariant formalism of Dudarev *et al.*5, where only the effective parameter *U*eff​ = *U*-*J* (the difference between the Coulomb *U* and exchange *J* parameters) is considered. Spin-polarized calculations were employed throughout. The interaction between ions and electrons was described using the projector augmented wave (PAW) method6-8 with the frozen-core approximation. Valence electrons for Ce (4*f*, 5s*s*, 5*p*, 5*d*, 6*s*), O (2*s*, 2*p*), and Pd (4*p*, 4*d*, 5*s*) were explicitly treated using a plane-wave basis set with a kinetic energy cutoff of 400 eV. Bulk energies were converged to within 10−4 eV. For Ce, a *U*eff​ value of 4.5 eV was used, consistent with the self-consistent linear response approach of Fabris *et al.*9 and within the reported range (3.0-5.5 eV) that ensures proper localization of the Ce 4*f* electrons upon oxygen removal from CeO210,11.

A CeO2(110) surface that is mostly present on r-CeO2 was employed in the reaction mechanism study, where the electron smearing was calculated using the Gaussian smearing method with a width of 0.05 eV. Geometry optimizations were carried out using the conjugate gradient algorithm, with a force and energy convergence criterion of 0.03 eV Å−1 and 10-5 eV, respectively. Calculation parameters underwent convergence tests and were also validated against literature12,13.

For the reaction mechanism study on CeO2, the pristine CeO2​(110) surface was modeled using a 2×2 supercell with four atomic layers (96 atoms), where the bottom two layers were fixed to mimic the bulk structure. A vacuum gap of 15 Å was introduced between neighboring slabs to prevent spurious interactions. Brillouin zone integration was performed using a 2×2×1 Monkhorst-Pack *k*-point grid14. Transition states (TS) for elementary reactions were identified using the climbing-image nudged elastic band (CI-NEB) method15,16 and confirmed by the presence of a single imaginary frequency. Activation barriers (*Ea*​) were defined as the energy difference between the TS and the initial state17. Adsorption energies (*Eads*​) were calculated as the change in total energy before and after adsorption, using the equation:

*Eads = E(Pd/CeO2_CO)ads – [E(Pd/CeO2) + E(CO)]*

Where *E(Pd/CeO2)* and *E(Pd/CeO2_CO)ads* represent the total energy of the system before and after CO adsorption on the Pd/CeO2​ surface, respectively.

For the subsequent electronic property calculations, the surface model of commercial Al2O3 (JCPDS No. 29-0063) and CeO2 (JCPDS No. 34-0394) were identified as Al2O3 (110) and CeO2 (111), respectively, on basis of the highest diffraction peaks of the standard card. The Al2​O3​ (110) surface was modeled using a six-layer slab, with the top three layers relaxed and a vacuum gap of 15 Å between the slabs. The CeO2​ (111) surface was modeled using a *p*(3×3) eight-layer supercell, with the bottom four layers relaxed and a 15 Å vacuum gap between the slabs. In the catalyst database, in addition to support types, the metal loadings were altered in the range of 0.1-1 wt.%, definitely together with the particle sizes of supported metals growing up. To highlight the significantly different metal loadings, we employed the structures of single metal atoms (M1), metal clusters with 7 atoms (M7), and bulk metal model to simulate the metal-oxide nanocrystals with increasing metal loadings from 0.1%, to 0.5%, and finally to 1%, respectively.

The M1​/Al2​O3​ and M7​/Al2​O3​ (M = Rh, Ni, Cu, Pd, Pt, Co, Ru) models were represented by a single metal atom and a cluster of 7 metal atoms on Al2​O3​ (110), respectively. Similarly, the M1​/CeO2​ and M7​/CeO2​ (M = Rh, Ni, Cu, Pd, Pt, Co, Ru) models were represented by a single metal atom and a cluster of seven metal atoms on CeO2​ (111), respectively. The Brillouin zone was sampled using a 3×3×1 Monkhorst-Pack *k*-point grid. Meanwhile, the Rh, Ni, Cu, Pd, Pt, and Co metal models were constructed using 2×2×2 supercells, while the Ru metal model was constructed using 3×3×2 supercells. The DFT+U method was employed to describe the localized Ce 4*f* (U = 5 eV) and Co 3*d* (U = 3.7 eV) states.

**B. Supporting Weisz-Prater Criterion/Mears’ Criterion Calculations**

**1. Mass transfer limitations: Internal diffusion**

The absence of internal mass transfer limitations was checked by the Weisz-Prater criterion (shown below), where if CWP is lower than 1, the internal mass transfer limitations can be neglected.

robs = 2.69×10-2 mol kgcat-1 s-1, (Observed reaction rate, taking the maximum CO2 conversion on Pd/CeO2 catalyzed CO2 hydrogenation at 400 oC).

ρc ≈ 7130 kg m-3 (Solid density of catalyst).

Rp ≈ 2.0×10-5 m (Catalyst particle radius).

Deff, effective diffusivity, calculated by the equation of *Deff* = *DABεpσc*/τ, in which DAB is gas-phase diffusivity. For a mixture of CO2-H2-He, DAB was calculated to be 1.92×10-5 m2 s-1; 𝜀𝑝 = 0.4 (Pellet porosity); 𝜎𝑐 = 0.8 (Constriction factor); 𝜏= 3 (Tortuosity); 𝐷𝑒ff ≈ 2.048×10-6 m2 s-1.

Cs ≈ 5.9375 mol m-3 (Gas concentration of CO2 at the external surface of the catalyst).

CWP = [2.69×10-2×7130×(2.0×10-5)2]/( 2.048×10-6×5.9375) = 6.3×10-3 < 1

Since the CWP is much lower than 1, this system does not suffer from internal mass transfer limitation.

**2. Mass transfer limitations: External diffusion**

The absence of external mass transfer limitations was checked by the Mears’ criterion (shown below), where if CM is lower than 0.15, the external mass transfer limitations can be neglected.

robs = 2.69×10-2 mol kgcat-1 s-1, (Observed reaction rate, taking the maximum CO2 conversion on Pd/CeO2 catalyzed CO2 hydrogenation at 400 oC).

ρb = 838 kg m-3 (Bulk density of catalyst bed).

Rp ≈ 2.0×10-5 m (Catalyst particle radius).

n ≈ 0.5 (Reaction order, taking the maximum value of H2 reaction order).

kc ≈ 1.0068 m s-1 (External mass transfer coefficient).

CAb ≈ Cs ≈ 5.9375 mol m-3 (Bulk gas concentration of CO2).

CM = (2.69×10-2×838×2.0×10-5×0.5)/( 1.0068×5.9375) = 3.77×10-5 < 0.15

Since the CM is much lower than 1, this system does not suffer from external mass transfer limitation.

**3. External (Interphase) heat transfer**

The absence of external (interphase) heat transfer limitations was checked by the Mears’ criterion (shown below), where if CM is lower than 0.15, the external (interphase) heat transfer limitations can be neglected.

∆H = 41.19 kJ mol-1 (Heat of reaction, CO2 hydrogenation to CO).

robs = 2.69×10-2 mol kgcat-1 s-1, (Observed reaction rate, taking the maximum CO2 conversion on Pd/CeO2 catalyzed CO2 hydrogenation at 400 oC).

ρb ≈ 838 kg m-3 (Bulk density of catalyst bed).

R ≈ 2.0×10-5 m (Catalyst particle radius).

E ≈ 61.8 kJ mol-1 (Activation energy, taking the maximum value in CO2 hydrogenation).

h ≈ 1.40 kJ m-2 s-1 K-1 (Heat transfer coefficient between gas and pellet).

T = 673 K (Maximum reaction temperature).

Rg = 8.314×10-3 kJ mol-1 K-1 (Gas constant).

CM = |(-41.19×2.69×10-2×838×2.0×10-5×61.8)/(1.40×6732×8.314×10-3)| = 2.17×10-4 < 0.15

Since the CM is much lower than 1, this system does not suffer from heat transfer limitation.

**C. Supporting Figures and Tables**

**
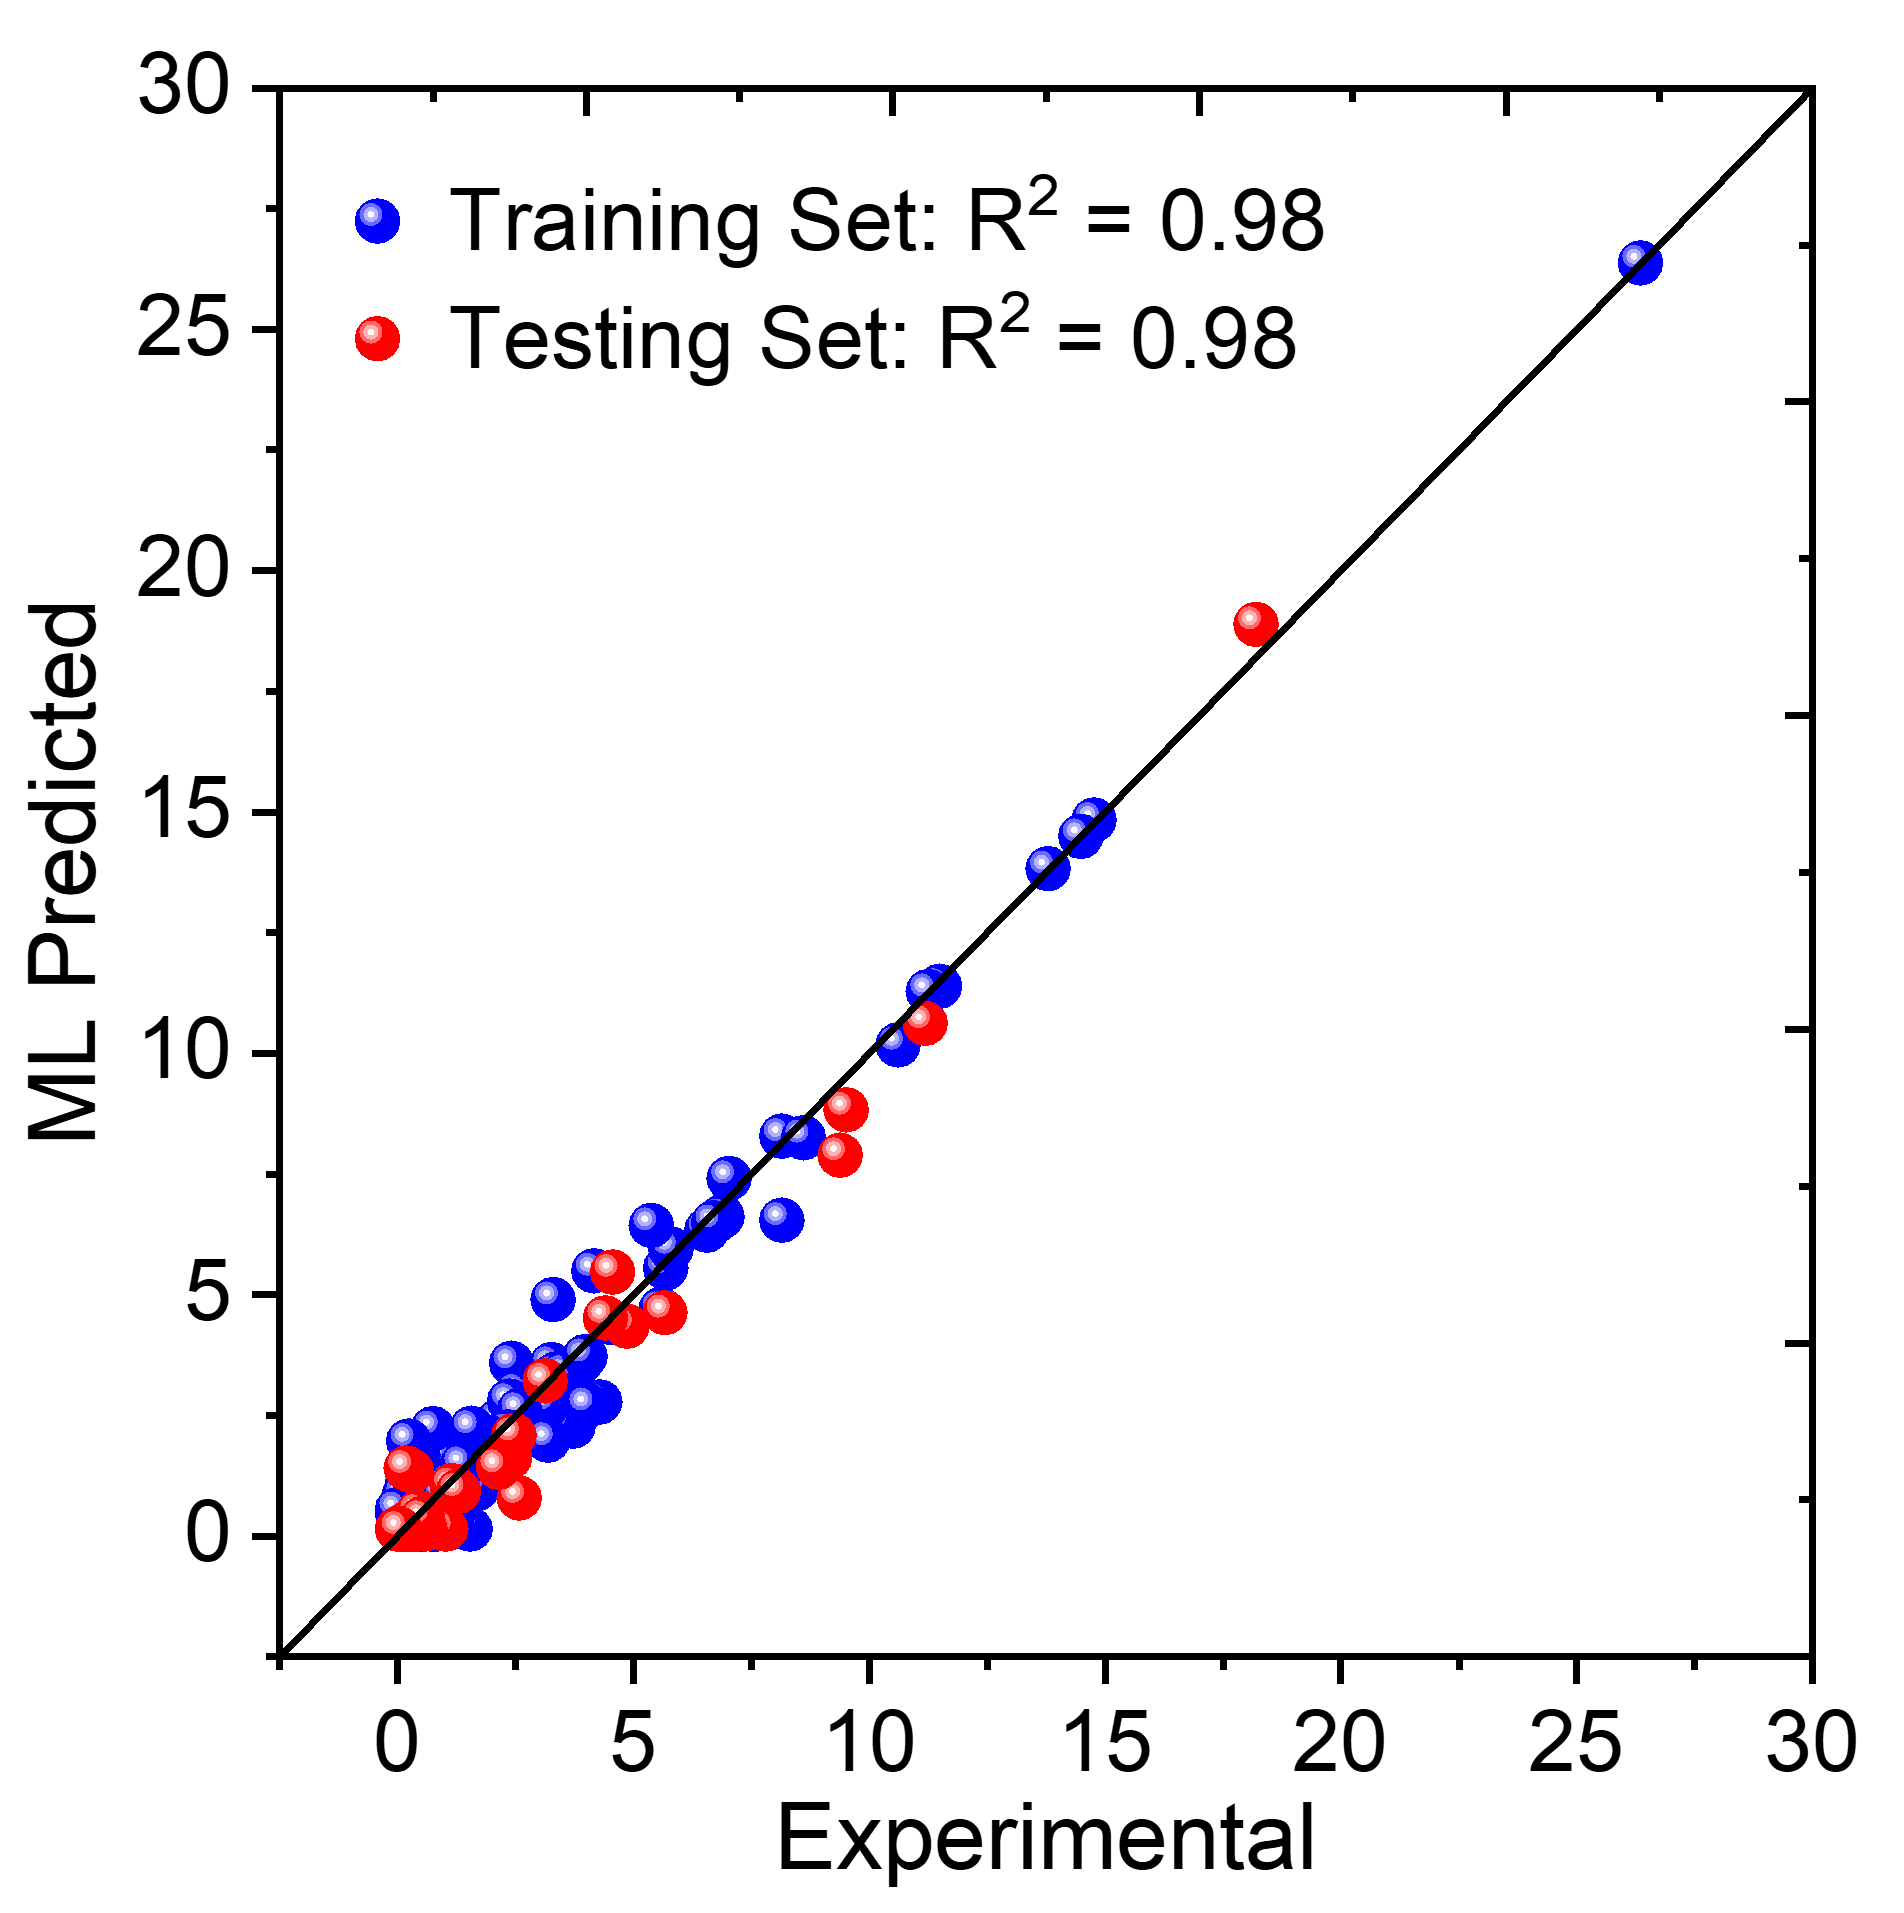
**

**Fig. S1.** Scatter plots of the training sets and testing sets showing the performance of the machine learning model used for establishing a quantitative relationship between catalyst formulation (including the type of supported metal, support material, and metal loading), reaction conditions (temperature), and catalytic performance

**
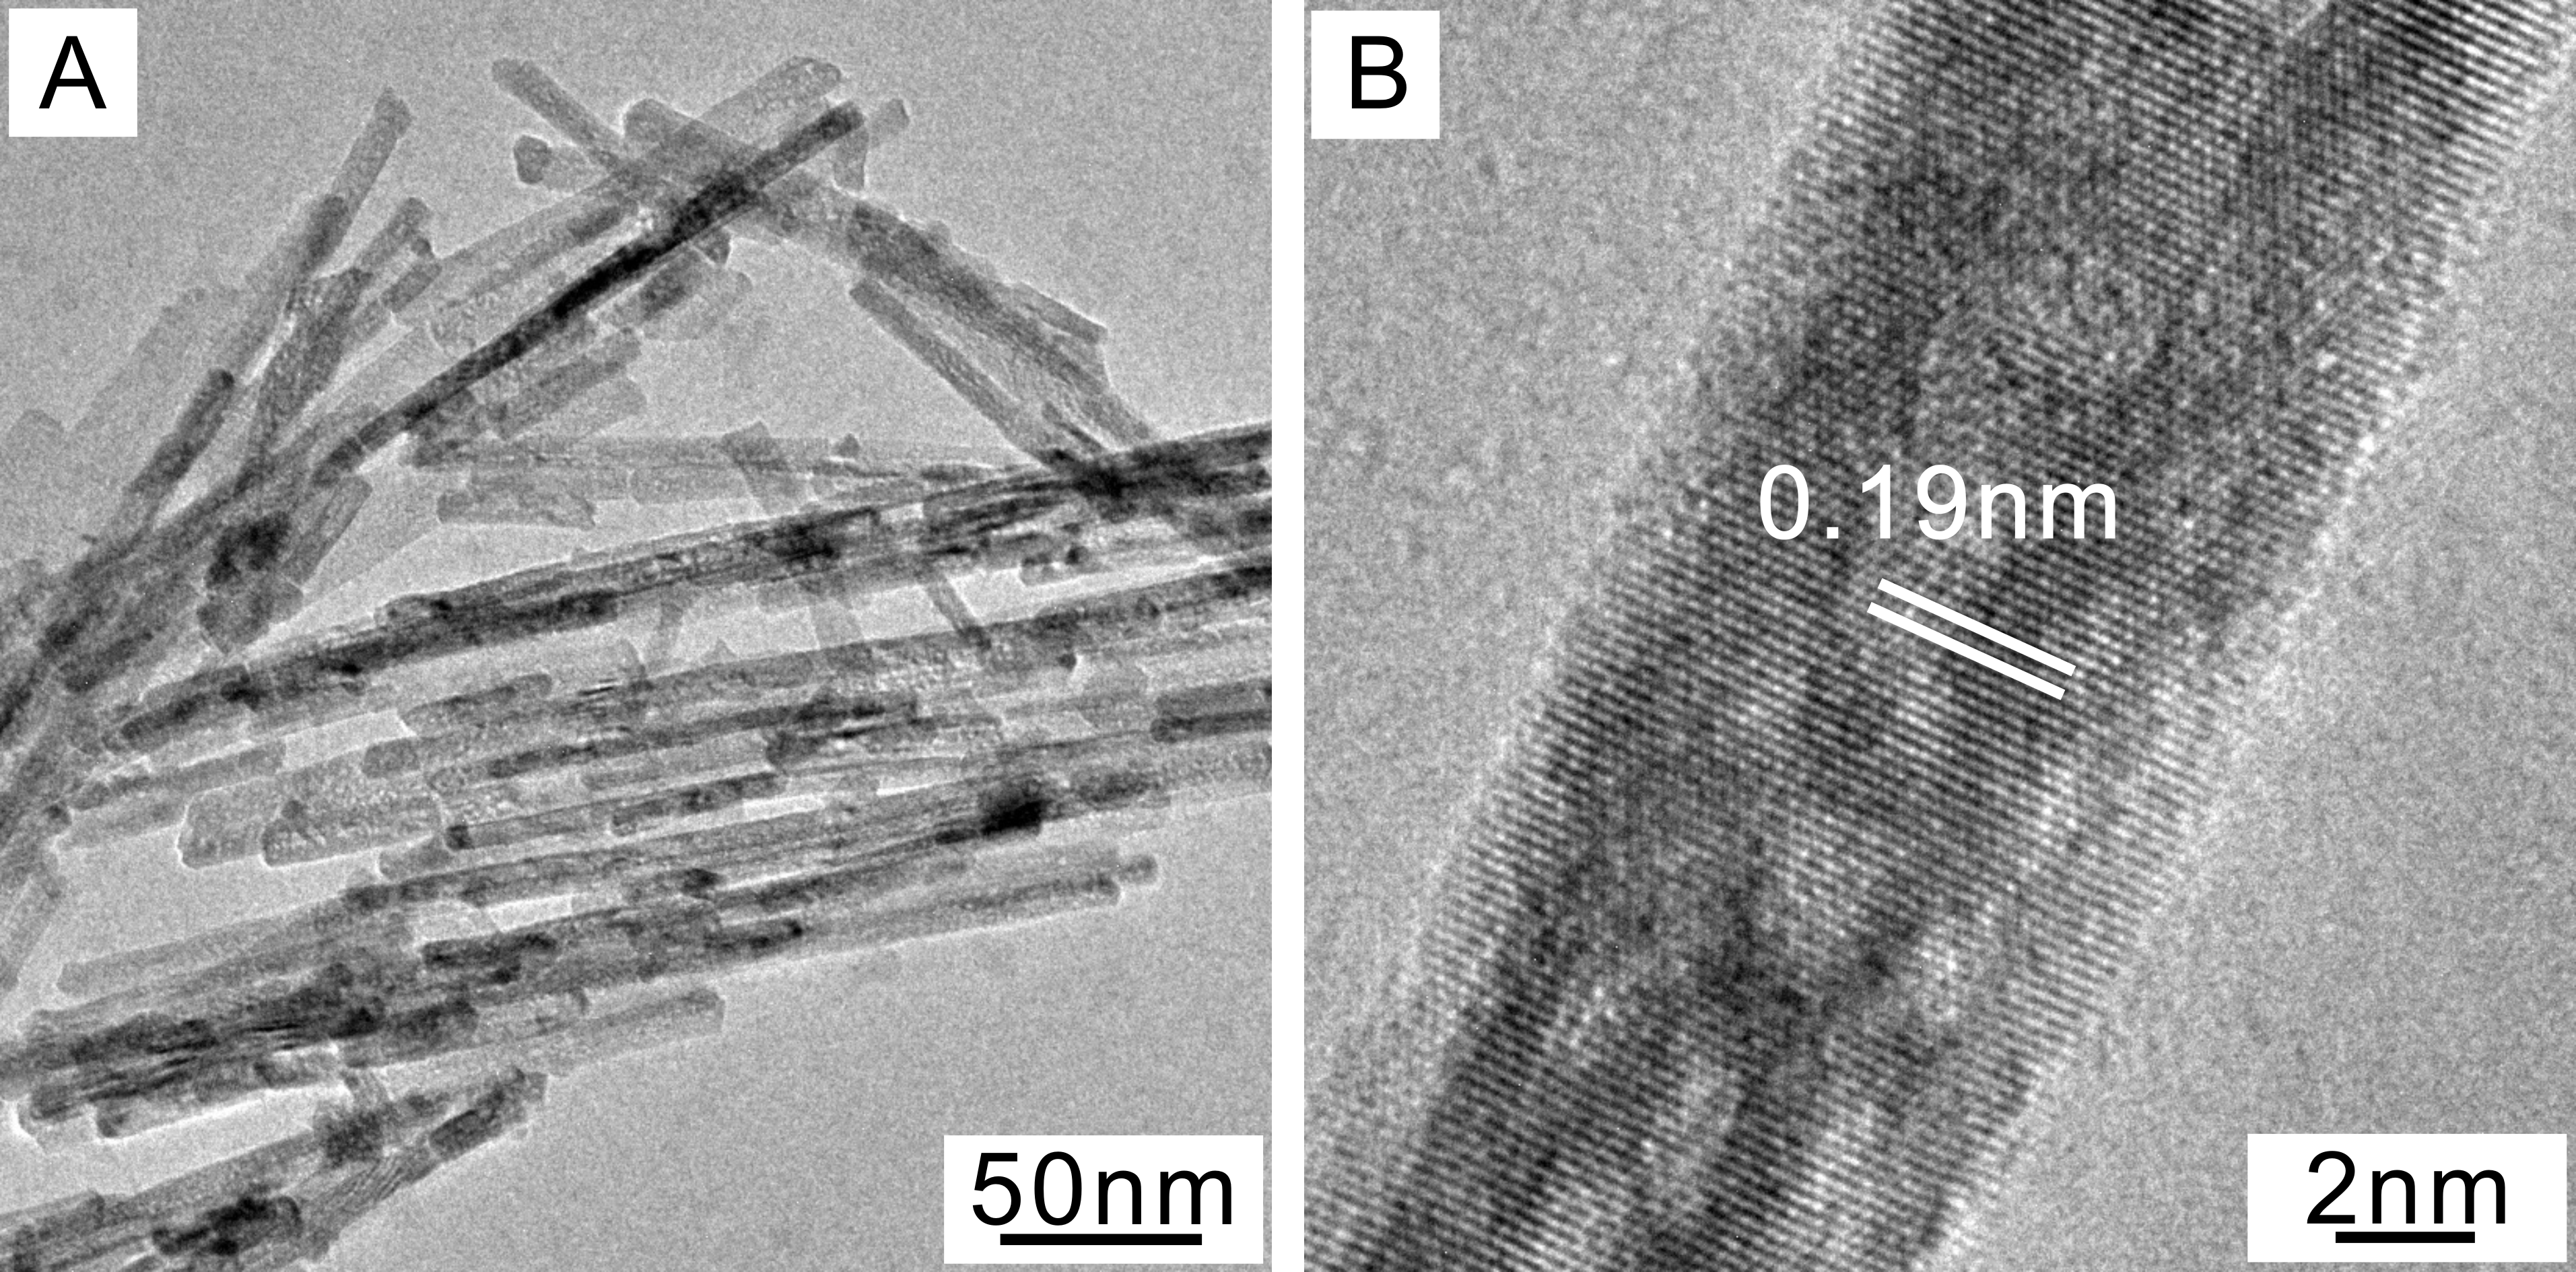
**

**Fig. S2.** (A) TEM and (B) HRTEM images of as-prepared r-CeO2 nanocrystals. Lattice fringe of 0.19 nm corresponds to the spacing of CeO2{220} crystal plane (JCPDS card No. 34-0394).

**Table S1.** The actual Pd contents over Pd/CeO2 catalysts determined by ICP-AES/MS measurements.

| Catalyst | Pd contents / wt.% |
| --- | --- |
| 0.1%Pd/CeO2 | 0.09 |
| 2%Pd/CeO2 | 1.94 |
| 8%Pd/CeO2 | 7.41 |

**
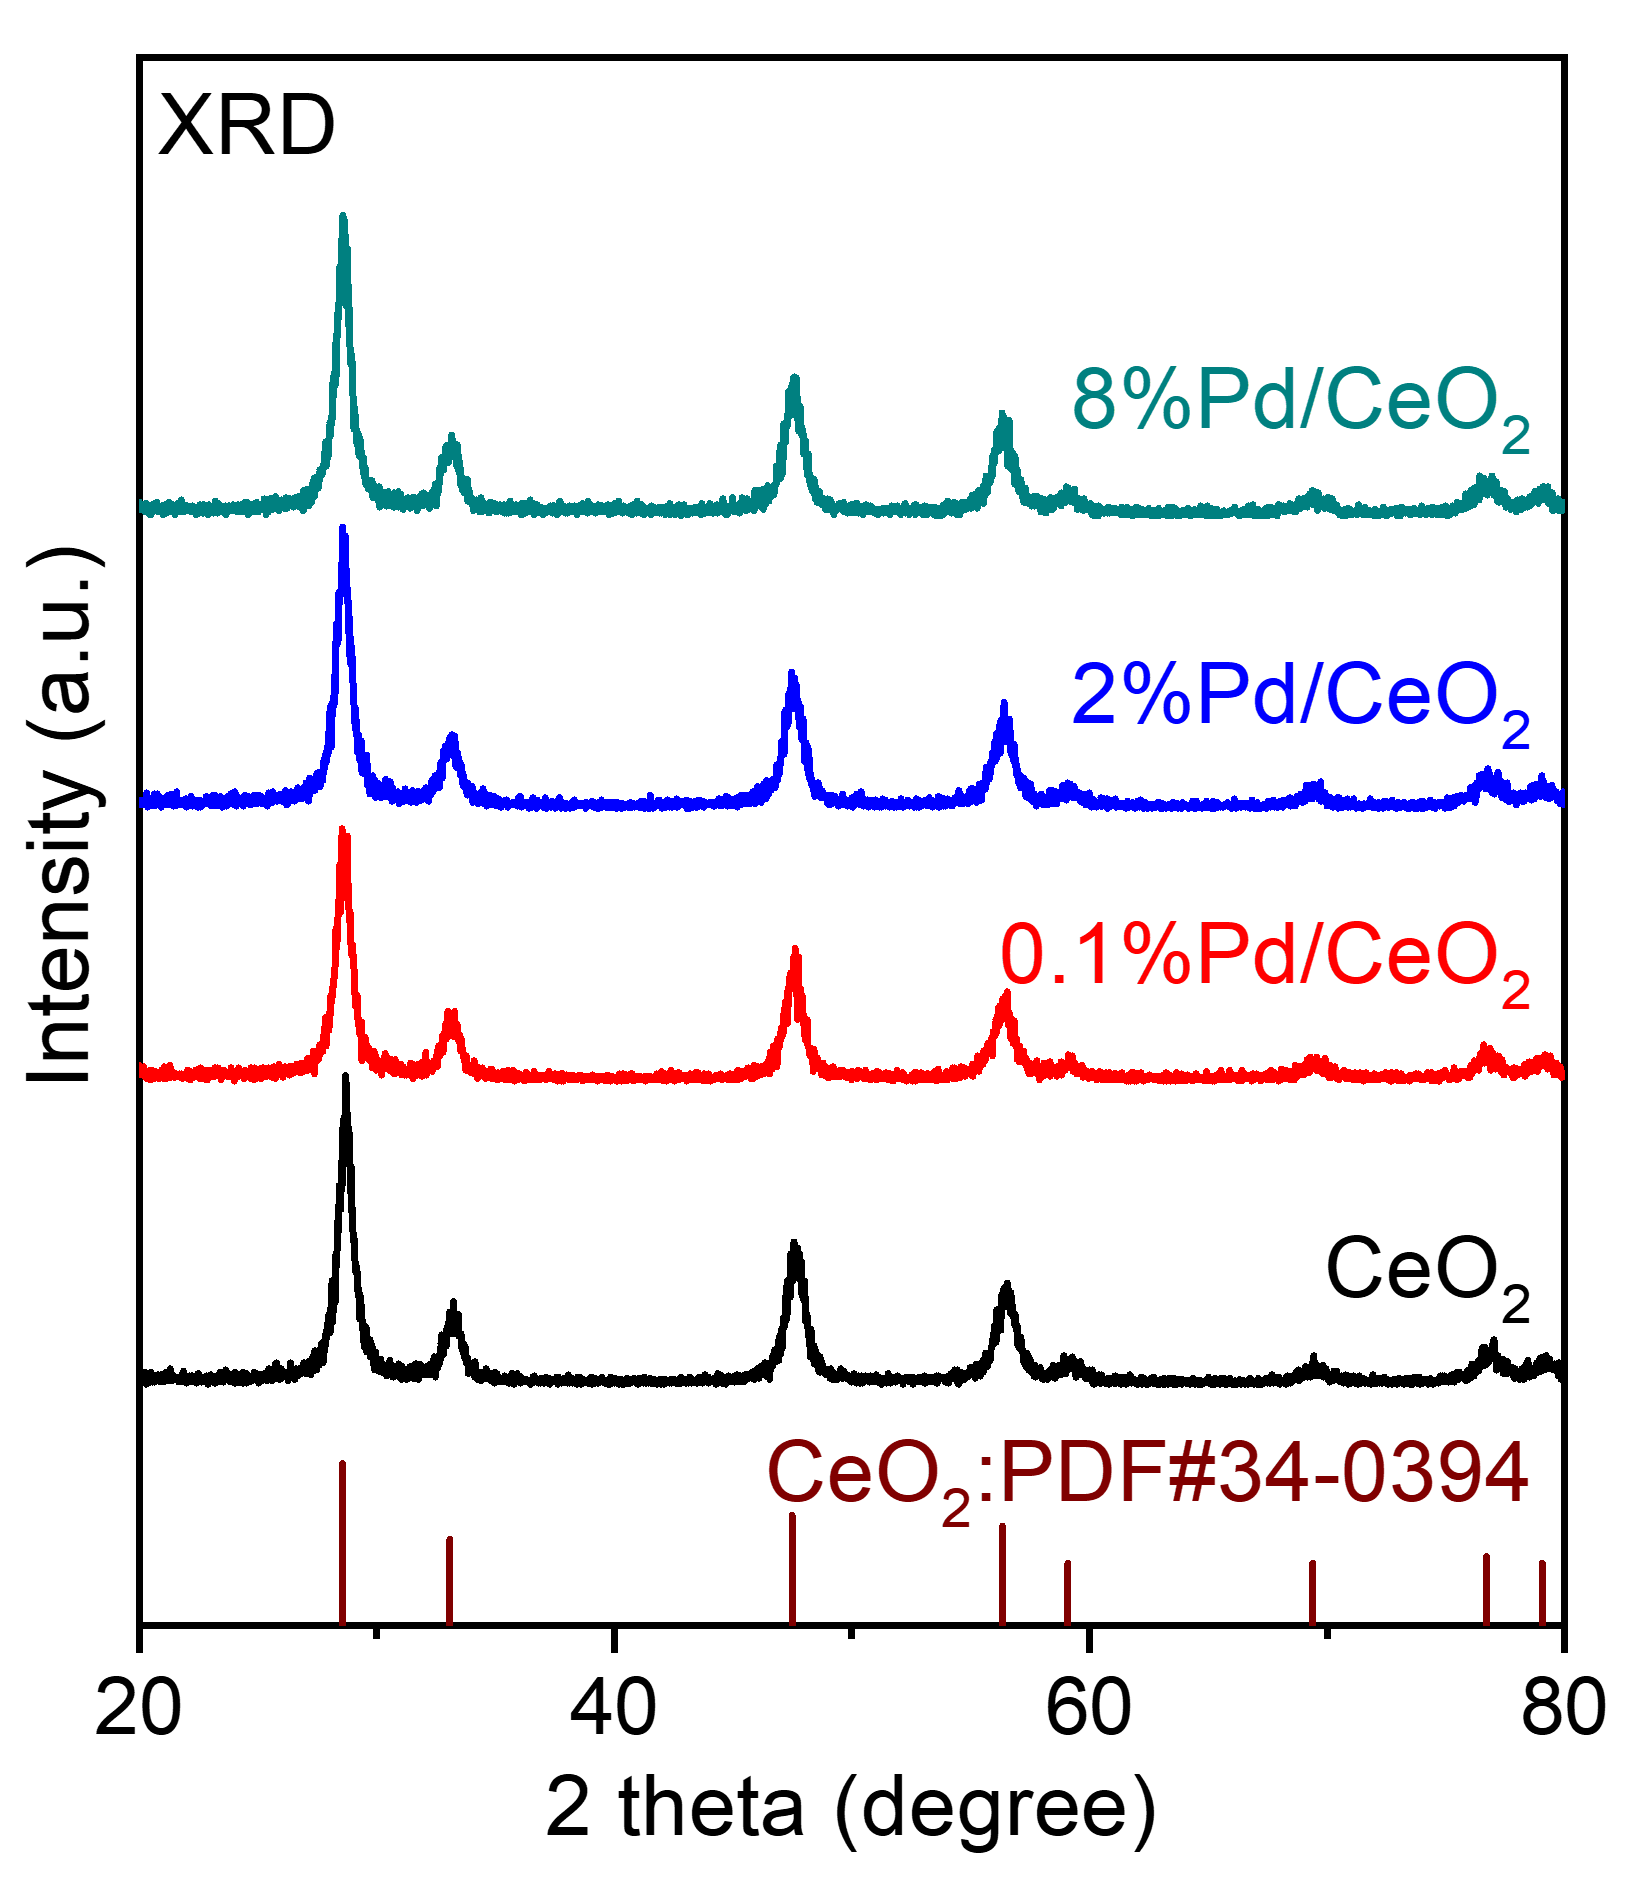
**

**Fig. S3.** XRD patterns of CeO2 and different Pd/CeO2 catalysts.

**Table S2.** The CeO2 crystalline sizes and lattice parameters of CeO2 and different Pd/CeO2 catalysts calculated on basis of XRD patterns (Fig. S3).

| Catalyst | Crystallite size / nm | CeO2 lattice parameter |
| --- | --- | --- |
| CeO2 | 10.8 | 5.4033 |
| 0.1%Pd/CeO2 | 11.6 | 5.4098 |
| 2%Pd/CeO2 | 11.2 | 5.4084 |
| 8%Pd/CeO2 | 11.3 | 5.4100 |

**Table S3.** Pd 3d XPS fitting parameters of different Pd/CeO2 catalysts.

| Valence state | FWHM / eV | L-G / % |
| --- | --- | --- |
| Pd0 | 2.00 | 40 |
| Pdδ+ | 1.13 | 0 |

**
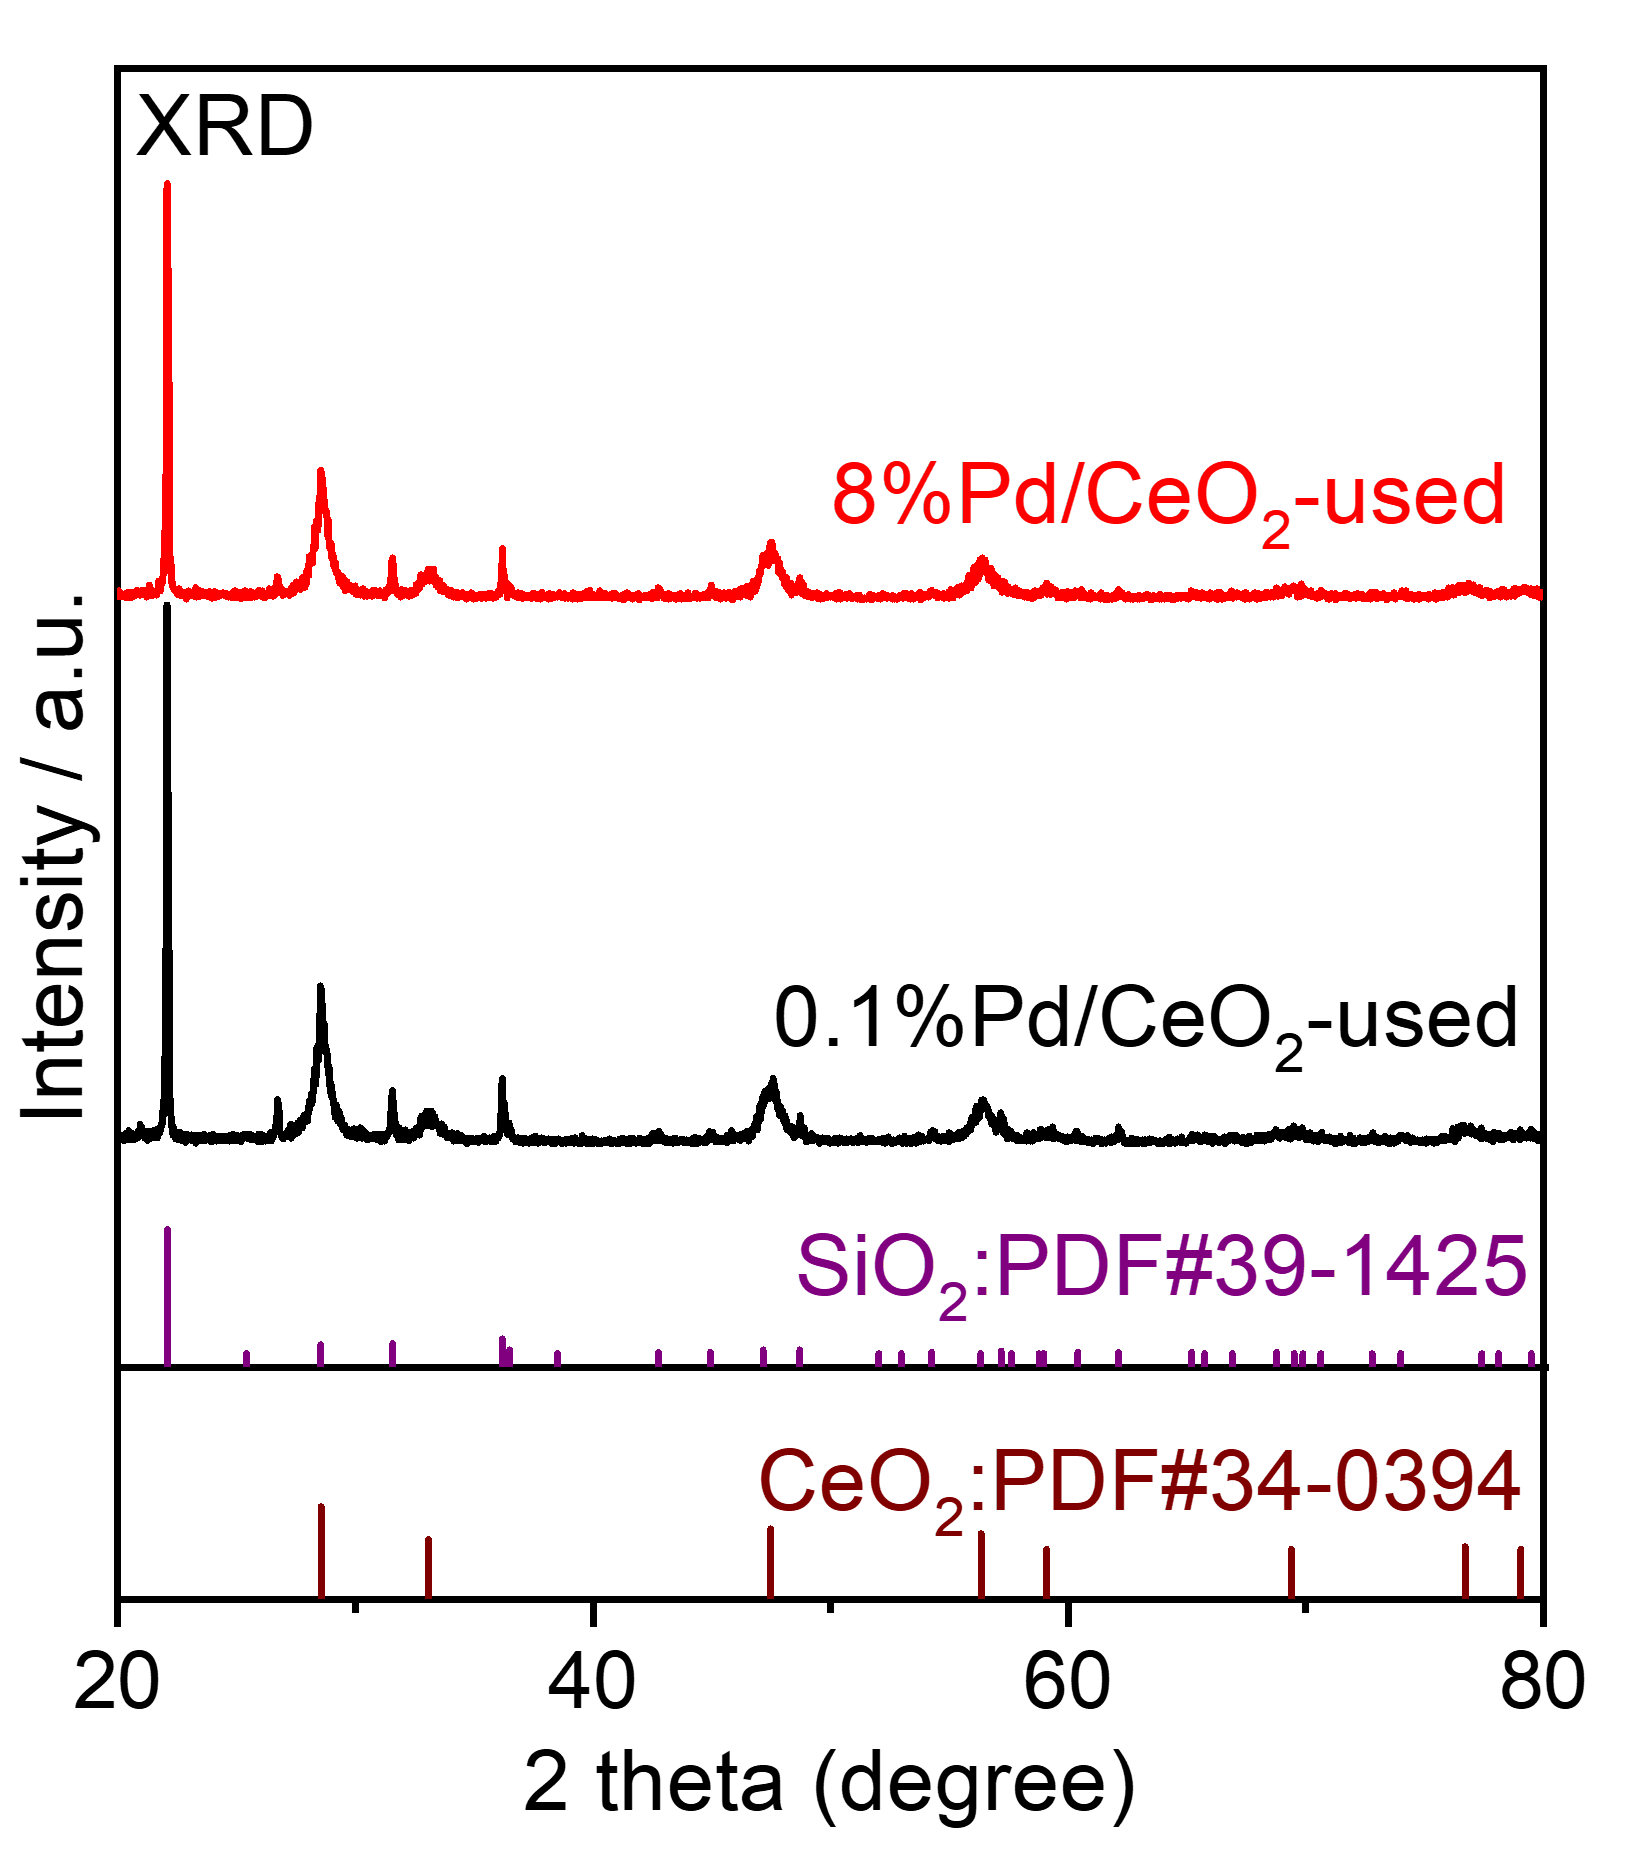
**

**Fig. S4.** XRD patterns of 0.1%Pd/CeO2-used and 8%Pd/CeO2-used catalysts.

**Table S4.** The CeO2 crystalline sizes and lattice parameters of different Pd/CeO2-used catalysts calculated on basis of XRD patterns (Fig. S4). Compared to corresponding fresh Pd/CeO2 catalysts, the calculated CeO2 crystalline sizes and lattice parameters do not vary obviously. This indicates the support structures of Pd/CeO2 catalysts less affected in CO2 hydrogenation.

| Catalyst | Crystallite size / nm | CeO2 lattice parameter |
| --- | --- | --- |
| 0.1%Pd/CeO2 | 11.3 | 5.4116 |
| 8%Pd/CeO2 | 11.4 | 5.4108 |

**
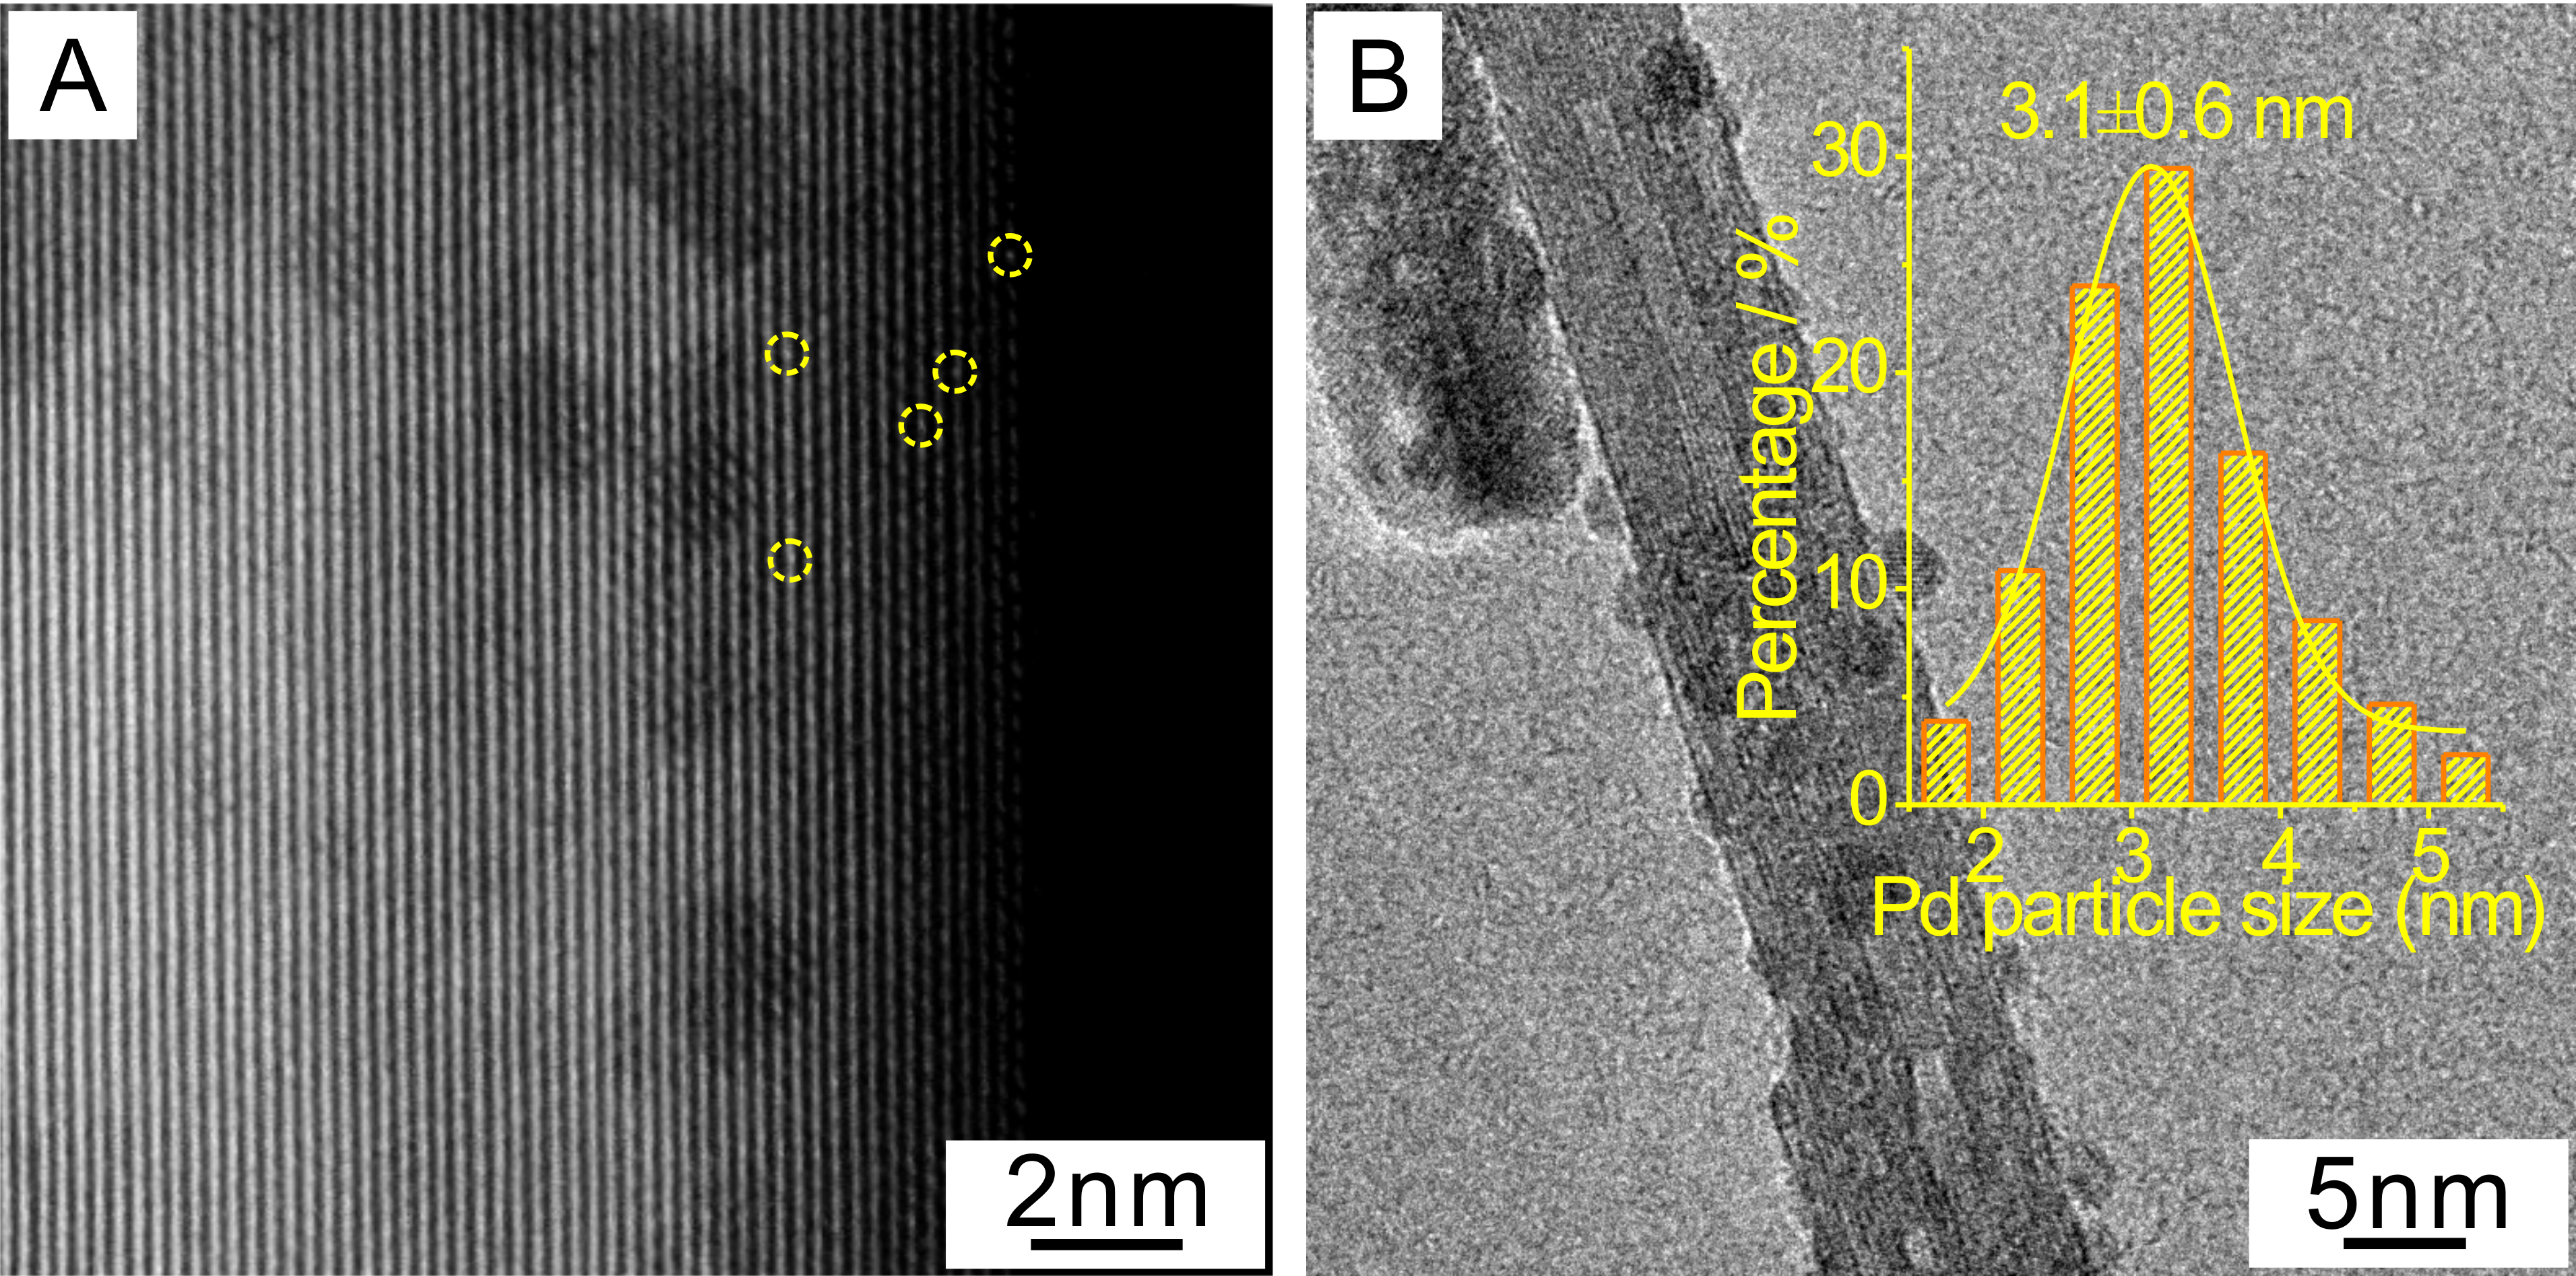
**

**Fig. S5.** (A) Representative HAADF-STEM image of 0.1%Pd/CeO2 catalyst; (B) Representative TEM images of 8%Pd/CeO2 catalysts. A portions of the atomically dispersed Pd atoms in Fig. S5A are highlighted by the yellow circles. The inset in Fig. S5B shows corresponding Pd particle size distributions. Compared to corresponding fresh Pd/CeO2 catalysts, no agglomeration of Pd species was observed, which demonstrates stable Pd structures of Pd/CeO2 catalysts in CO2 hydrogenation.

**
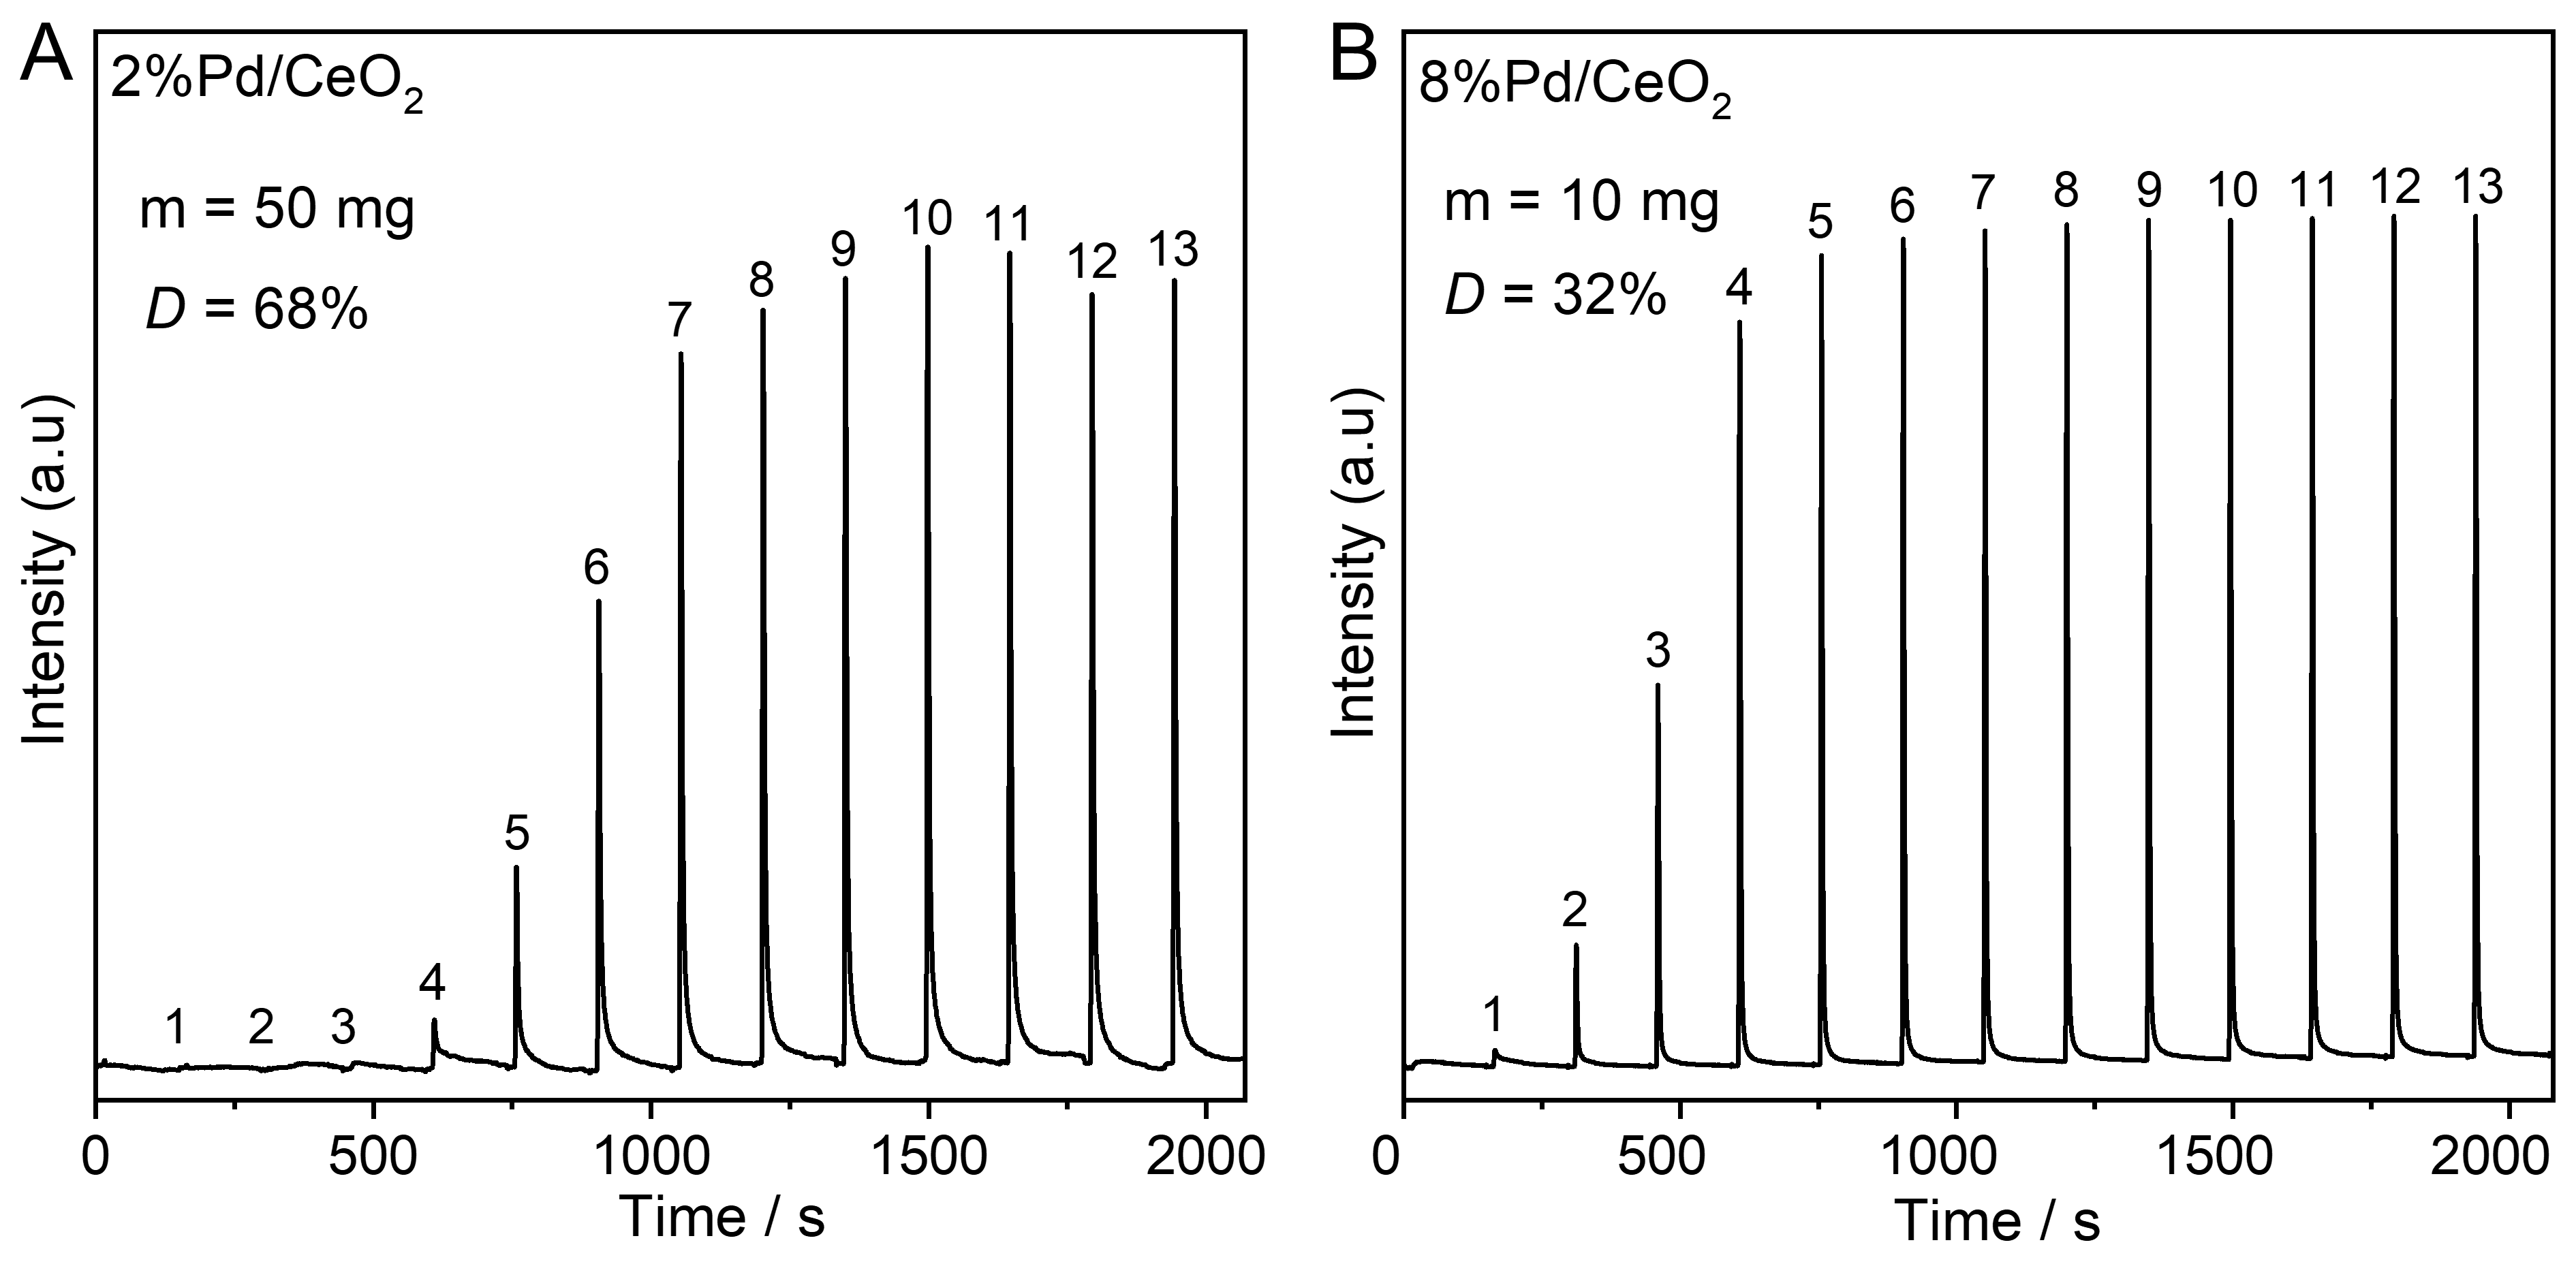
**

**Fig. S6.** CO titration profiles of (A) 2%Pd/CeO2 and (B) 8%Pd/CeO2 catalysts.

**Table S5.** Integrated areas of weak and medium CO2 adsorption sites of CeO2 and different Pd/CeO2 catalysts on basis of CO2-TPD results (Fig. 4E).

| Catalyst | Area of weak CO2 adsorption site | Area of medium CO2 adsorption site |
| --- | --- | --- |
| CeO2 | 565 | - |
| 0.1%Pd/CeO2 | 570 | 719 |
| 2%Pd/CeO2 | 860 | Seldom |
| 8%Pd/CeO2 | 380 | Seldom |

**
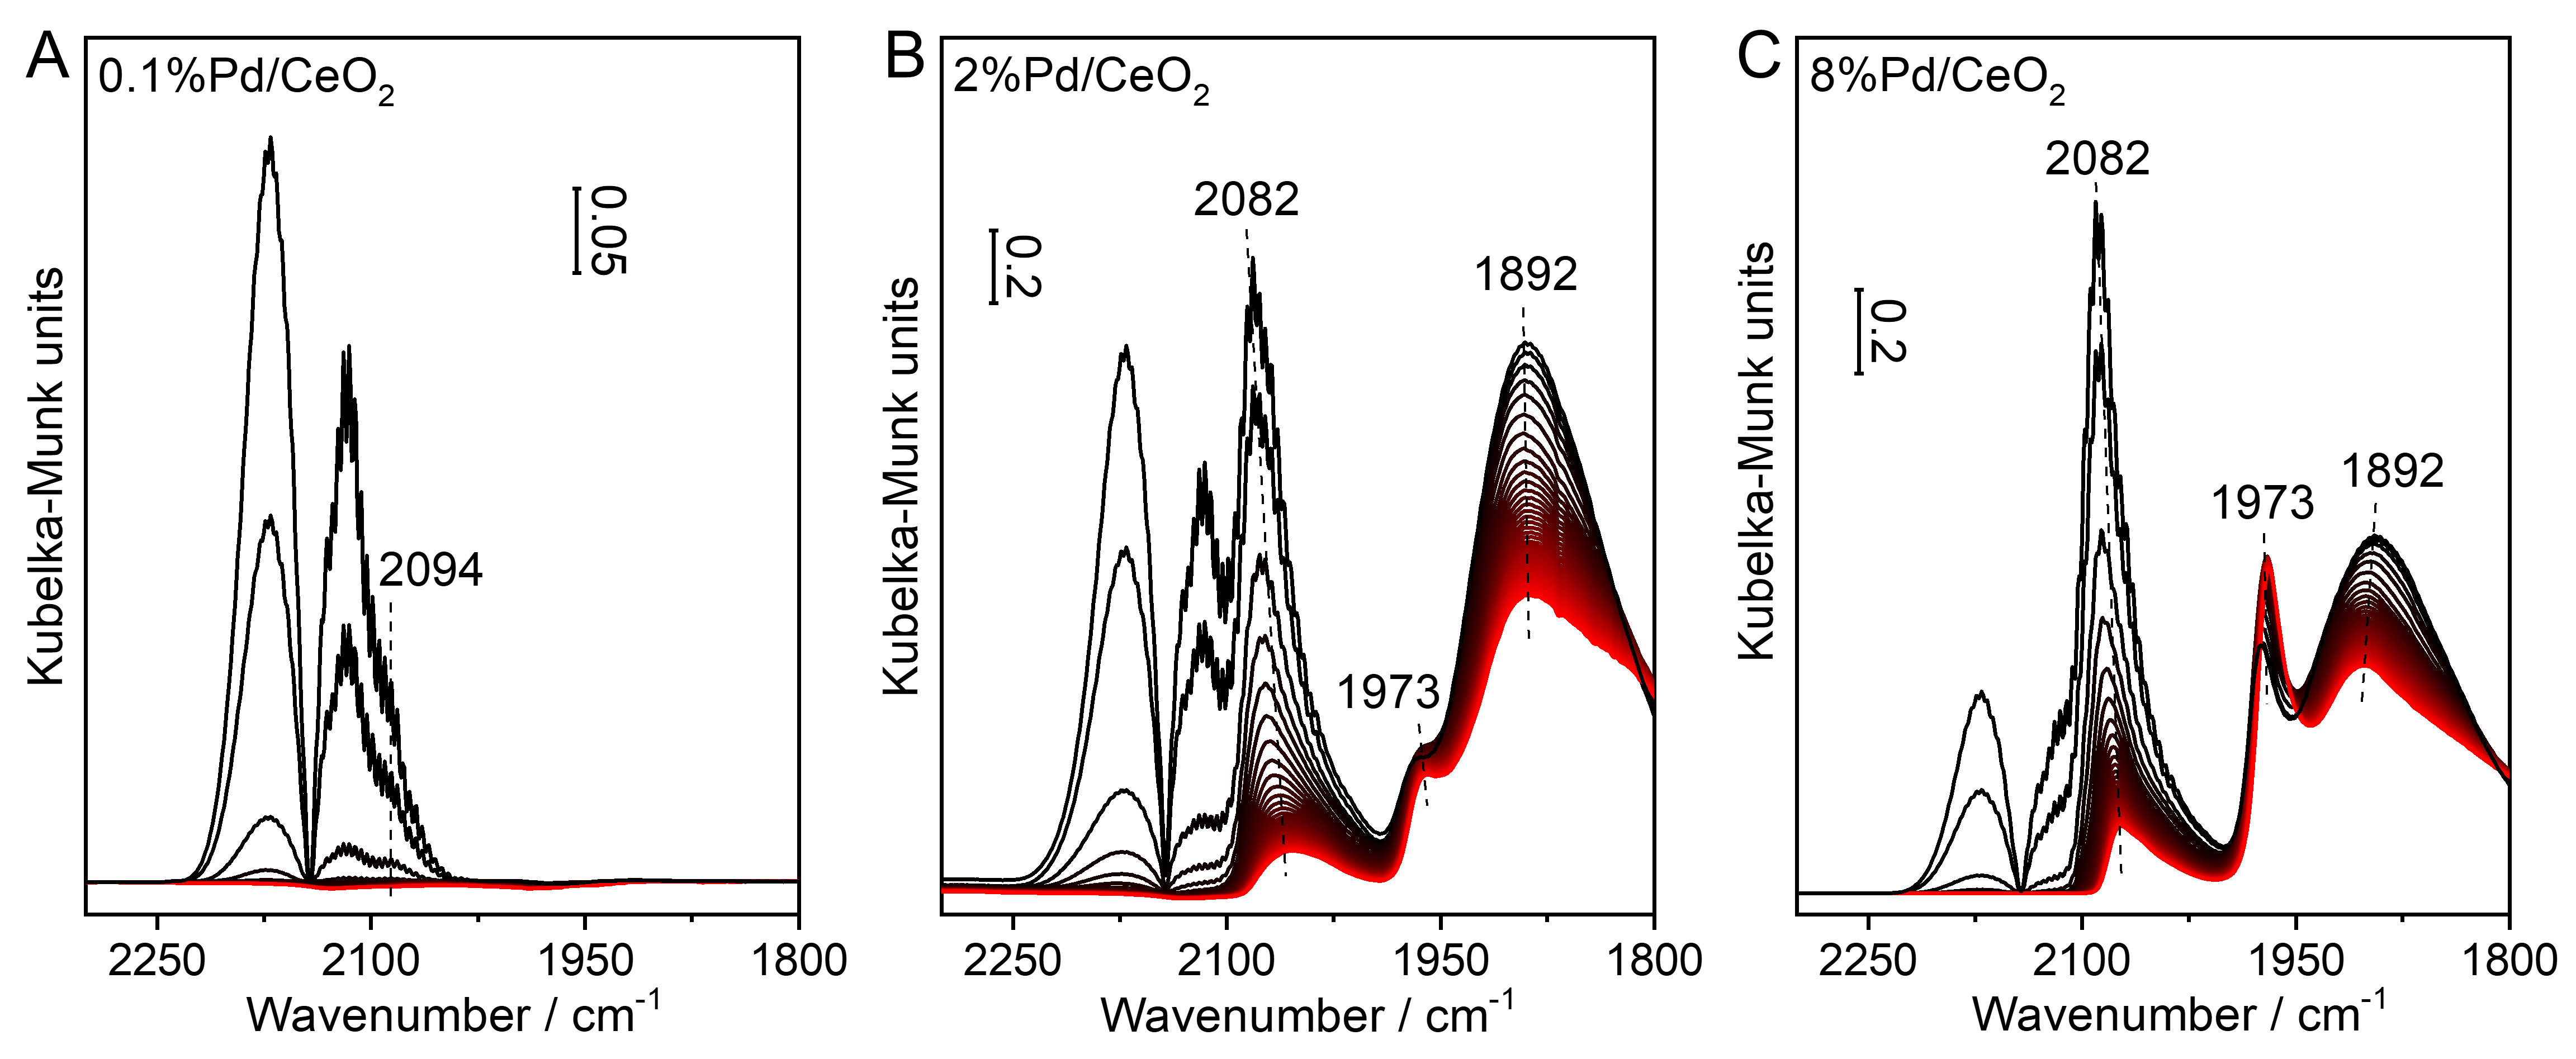
**

**Fig. S7.** In situ DRIFTS spectra recorded at different times during Ar purge after saturated CO adsorption on (A) 0.1%Pd/CeO2, (B) 2%Pd/CeO2, and (C) 8%Pd/CeO2 catalysts.

**Table S6.** Assignments of the vibrational bands in the DRIFTS spectra of different surface species over Pd/CeO2 catalysts.

| Assignment | Schematic structures | Bands (cm-1) | Ref. |
| --- | --- | --- | --- |
| Formate |  | 1588 and 1369  2945 and 2840 | 18,19 |
| Monodentate carbonate |  | 1510 and 1417 | 19-22 |
| Bicarbonate |  | 1287 | 19-22 |
| Unassigned carbonate | - | 1331 | 21,22 |
| Gaseous CO | - | 2174 and 2113 | - |
| Adsorbed CO species on Pd sites |  | 2046 and 2037 | 23 |
|  | 1942 and 1920 | 23 |
| Gaseous CH4 | - | 3016 | 19,20 |

**
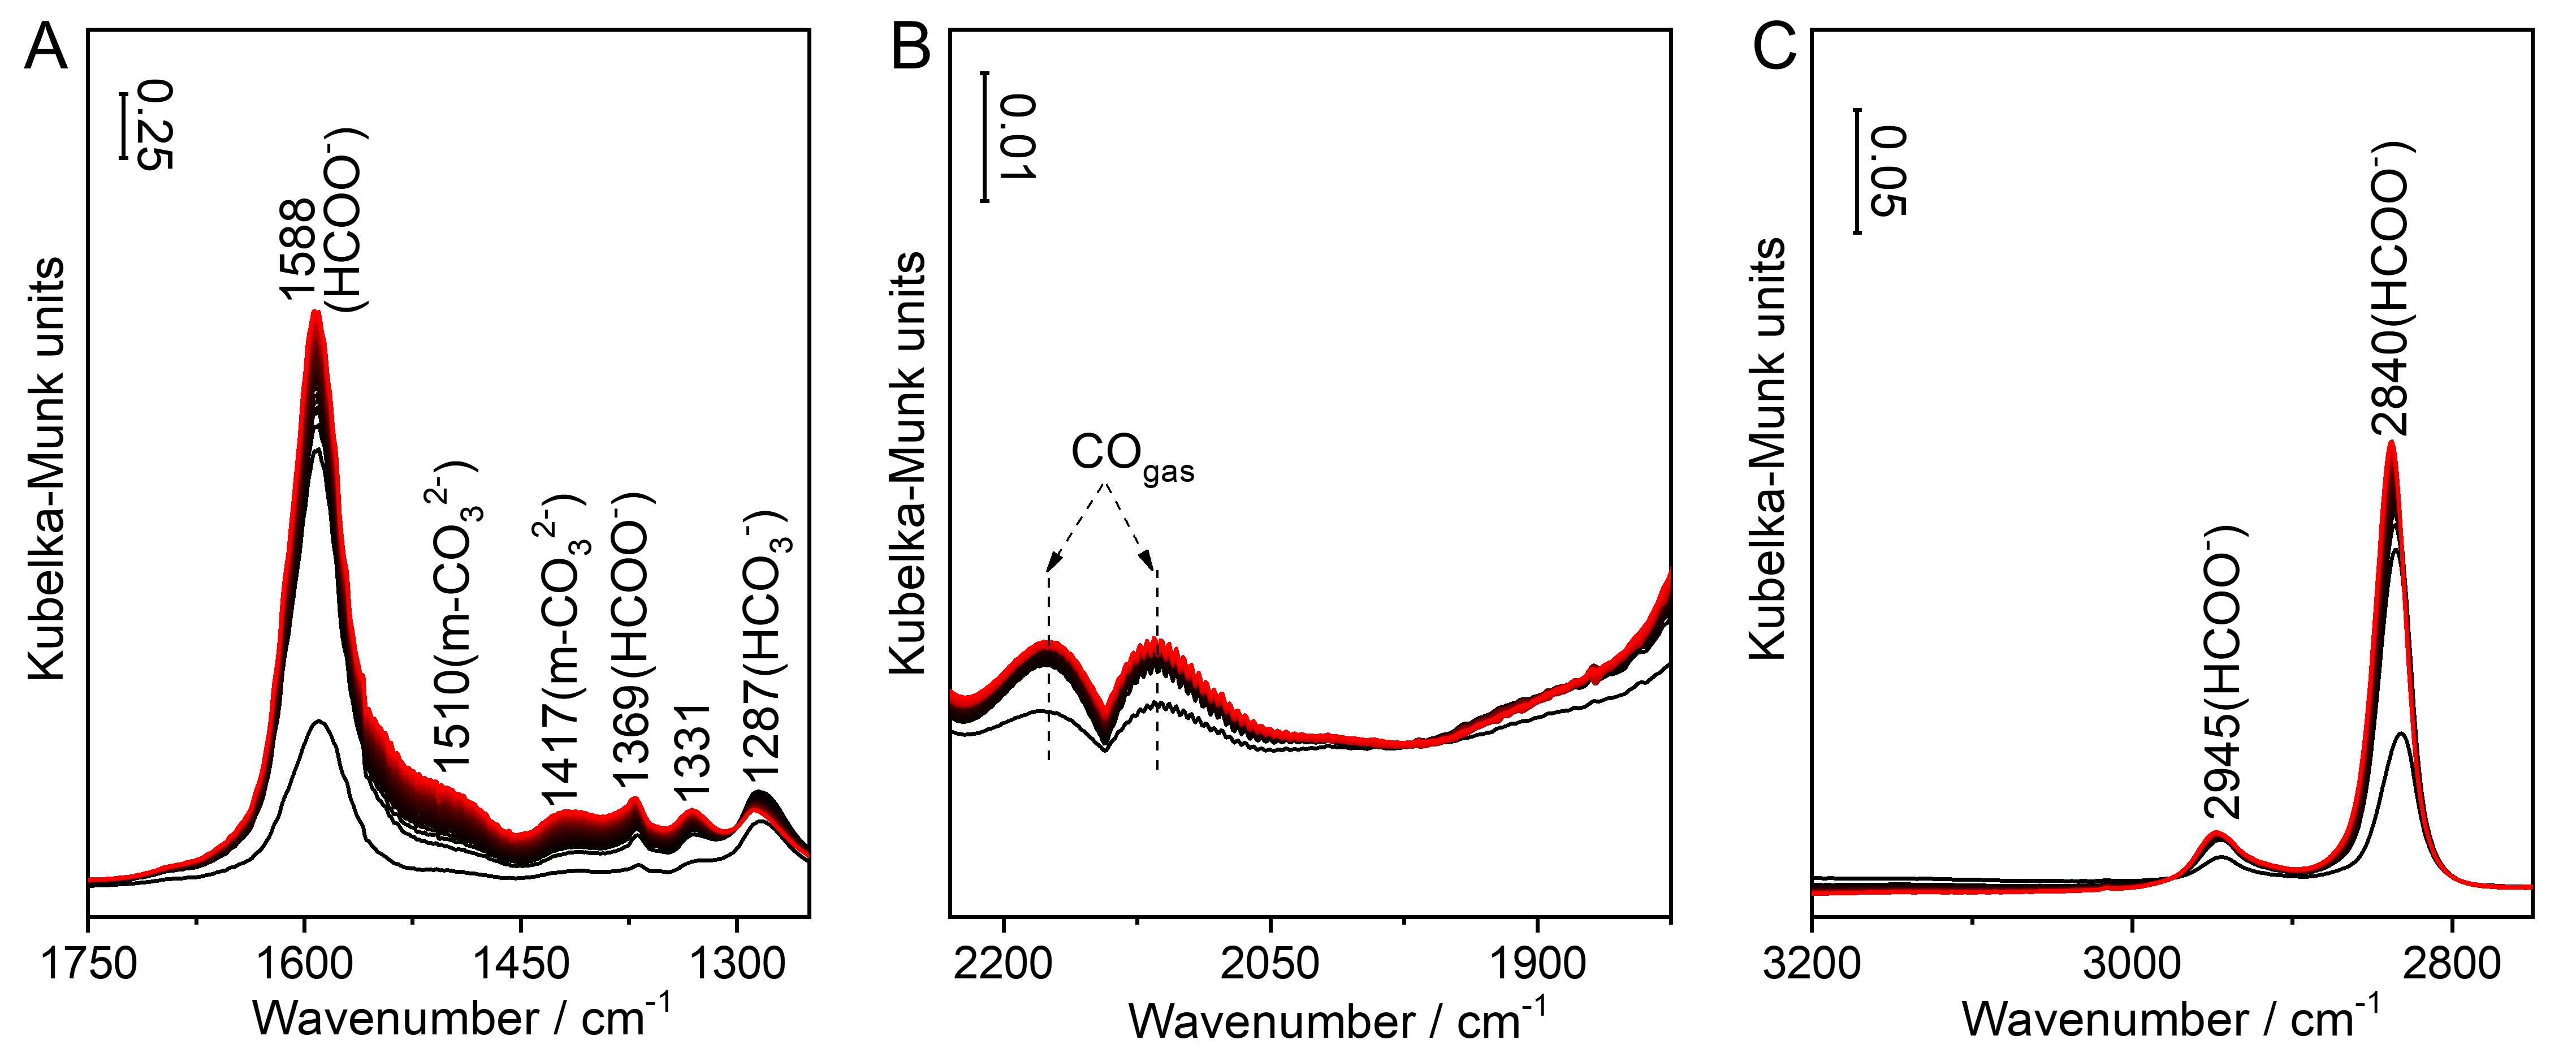
**

**Fig. S8.** In situ time-resolved DRIFTS spectra of 0.1%Pd/CeO2 catalyst under working conditions at 400 oC for 30 min at (A) C-O vibration region, (B) CO adsorption region, and (C) C-H vibration region.

**
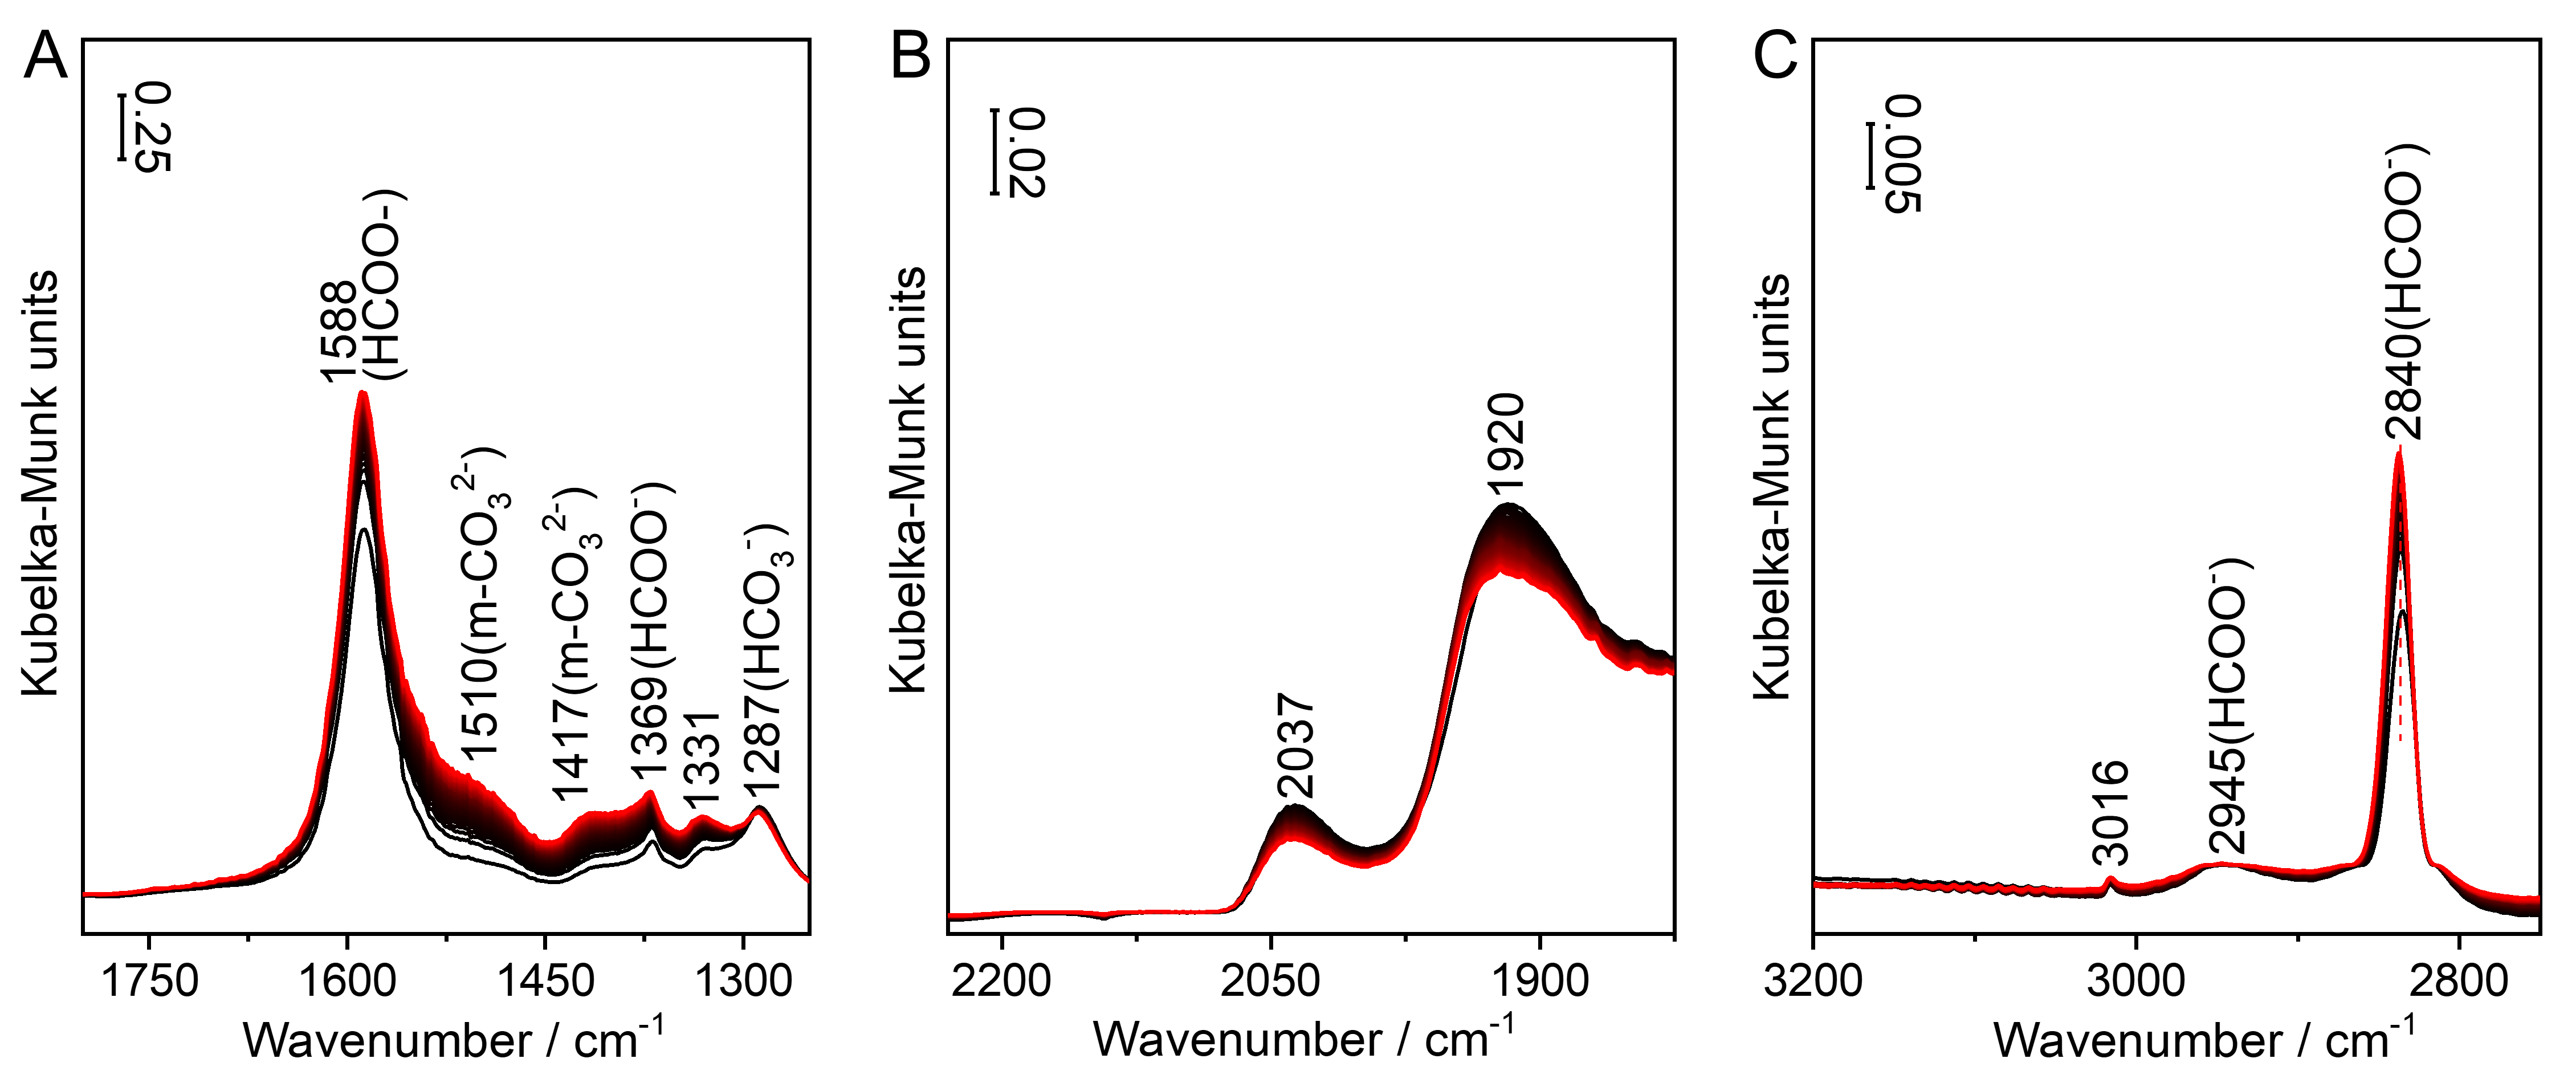
**

**Fig. S9.** In situ time-resolved DRIFTS spectra of 2%Pd/CeO2 catalyst under working conditions at 400 oC for 30 min at (A) C-O vibration region, (B) CO adsorption region, and (C) C-H vibration region.

**
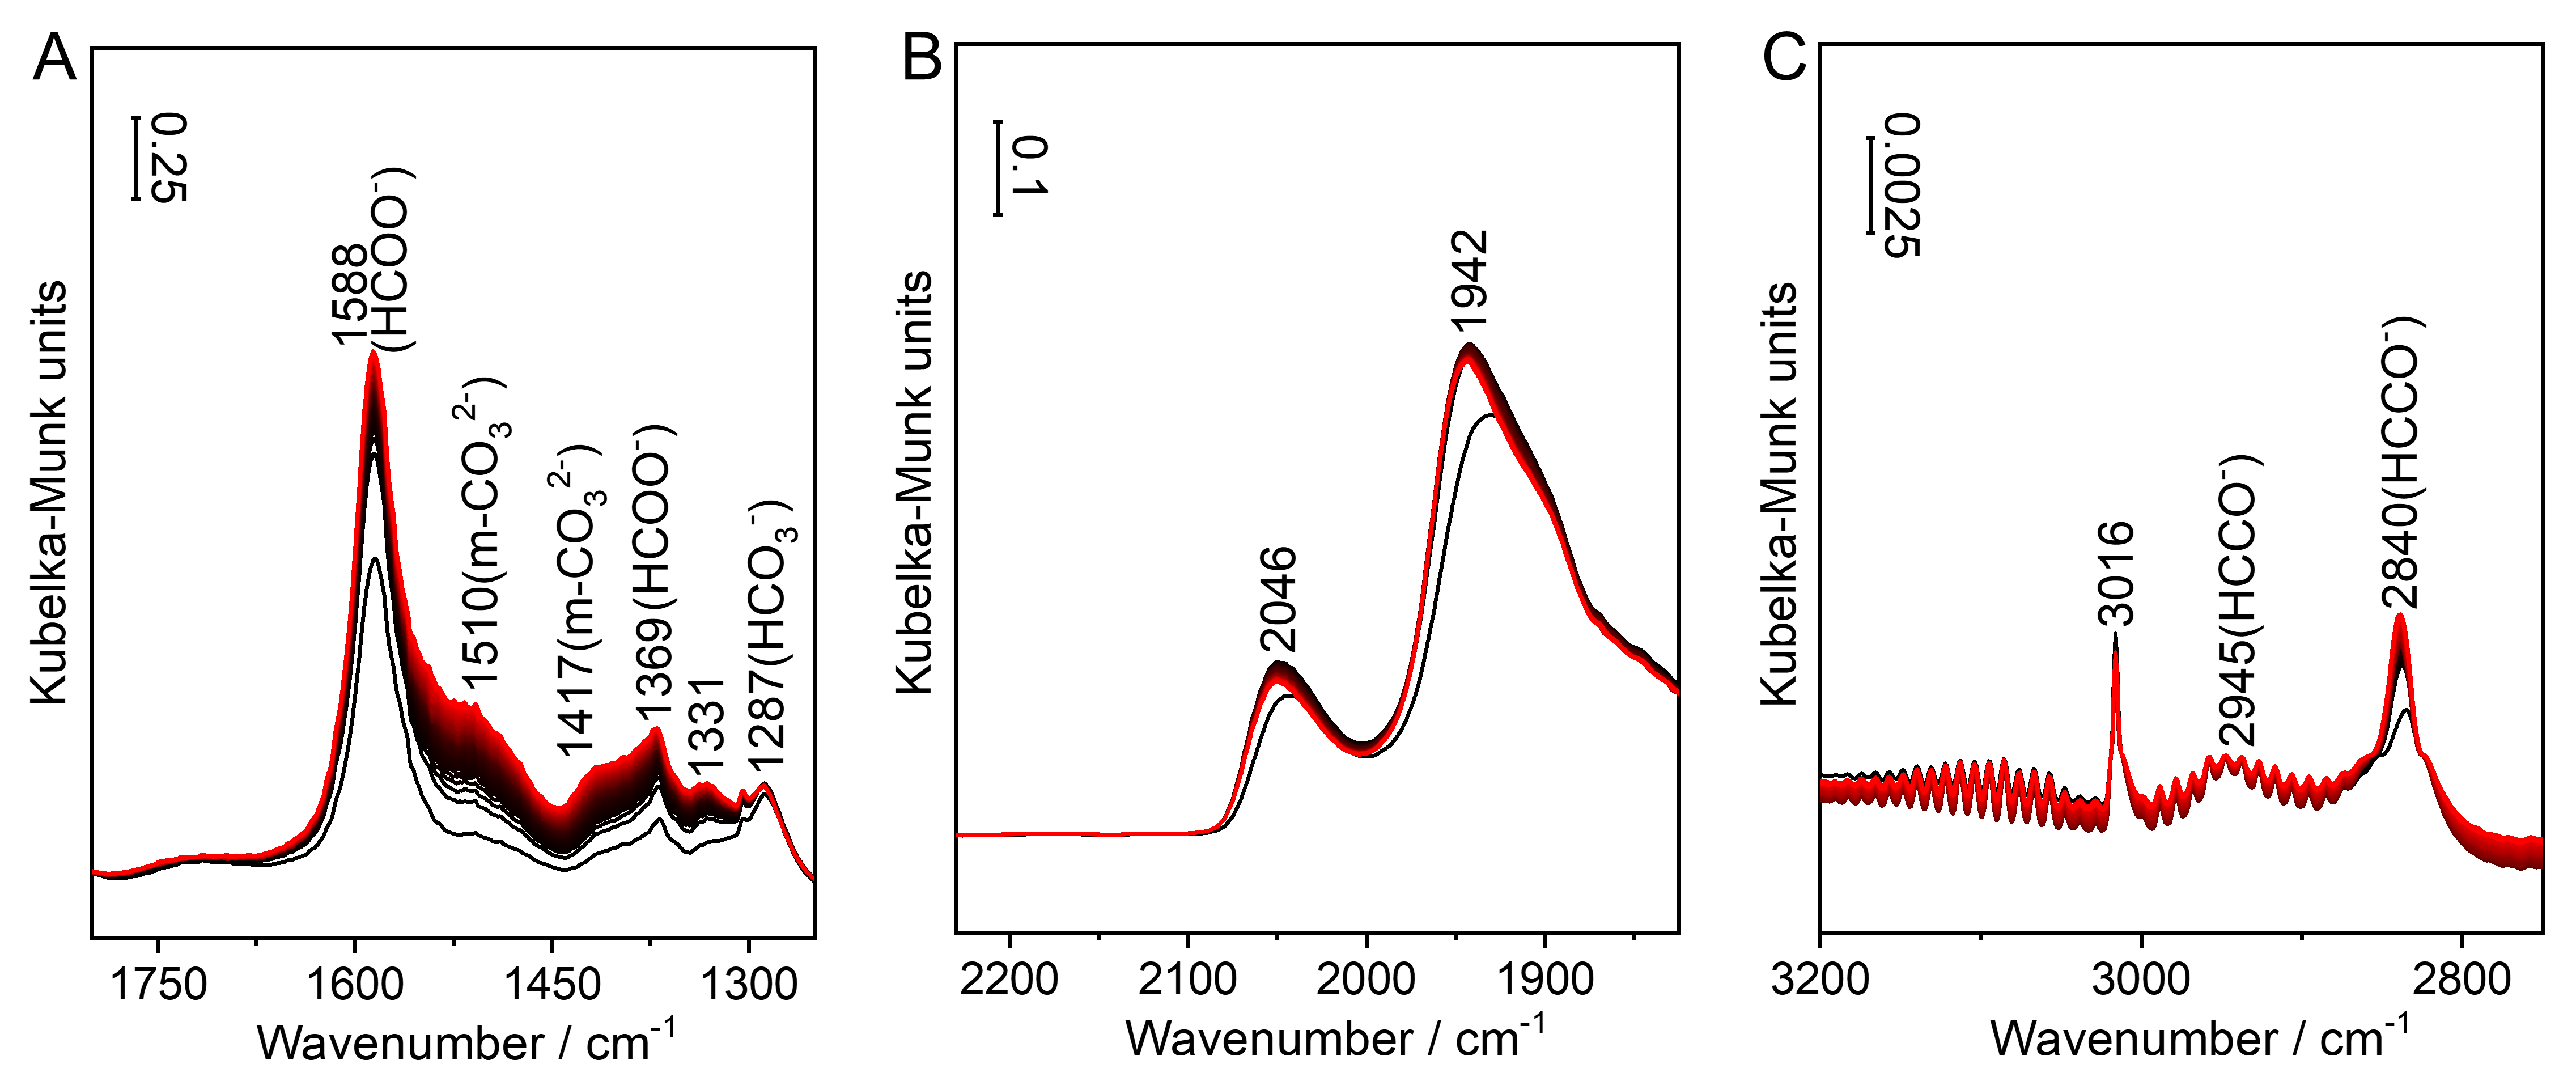
**

**Fig. S10.** In situ time-resolved DRIFTS spectra of 8%Pd/CeO2 catalyst under working conditions at 400 oC for 30 min at (A) C-O vibration region, (B) CO adsorption region, and (C) C-H vibration region.

**
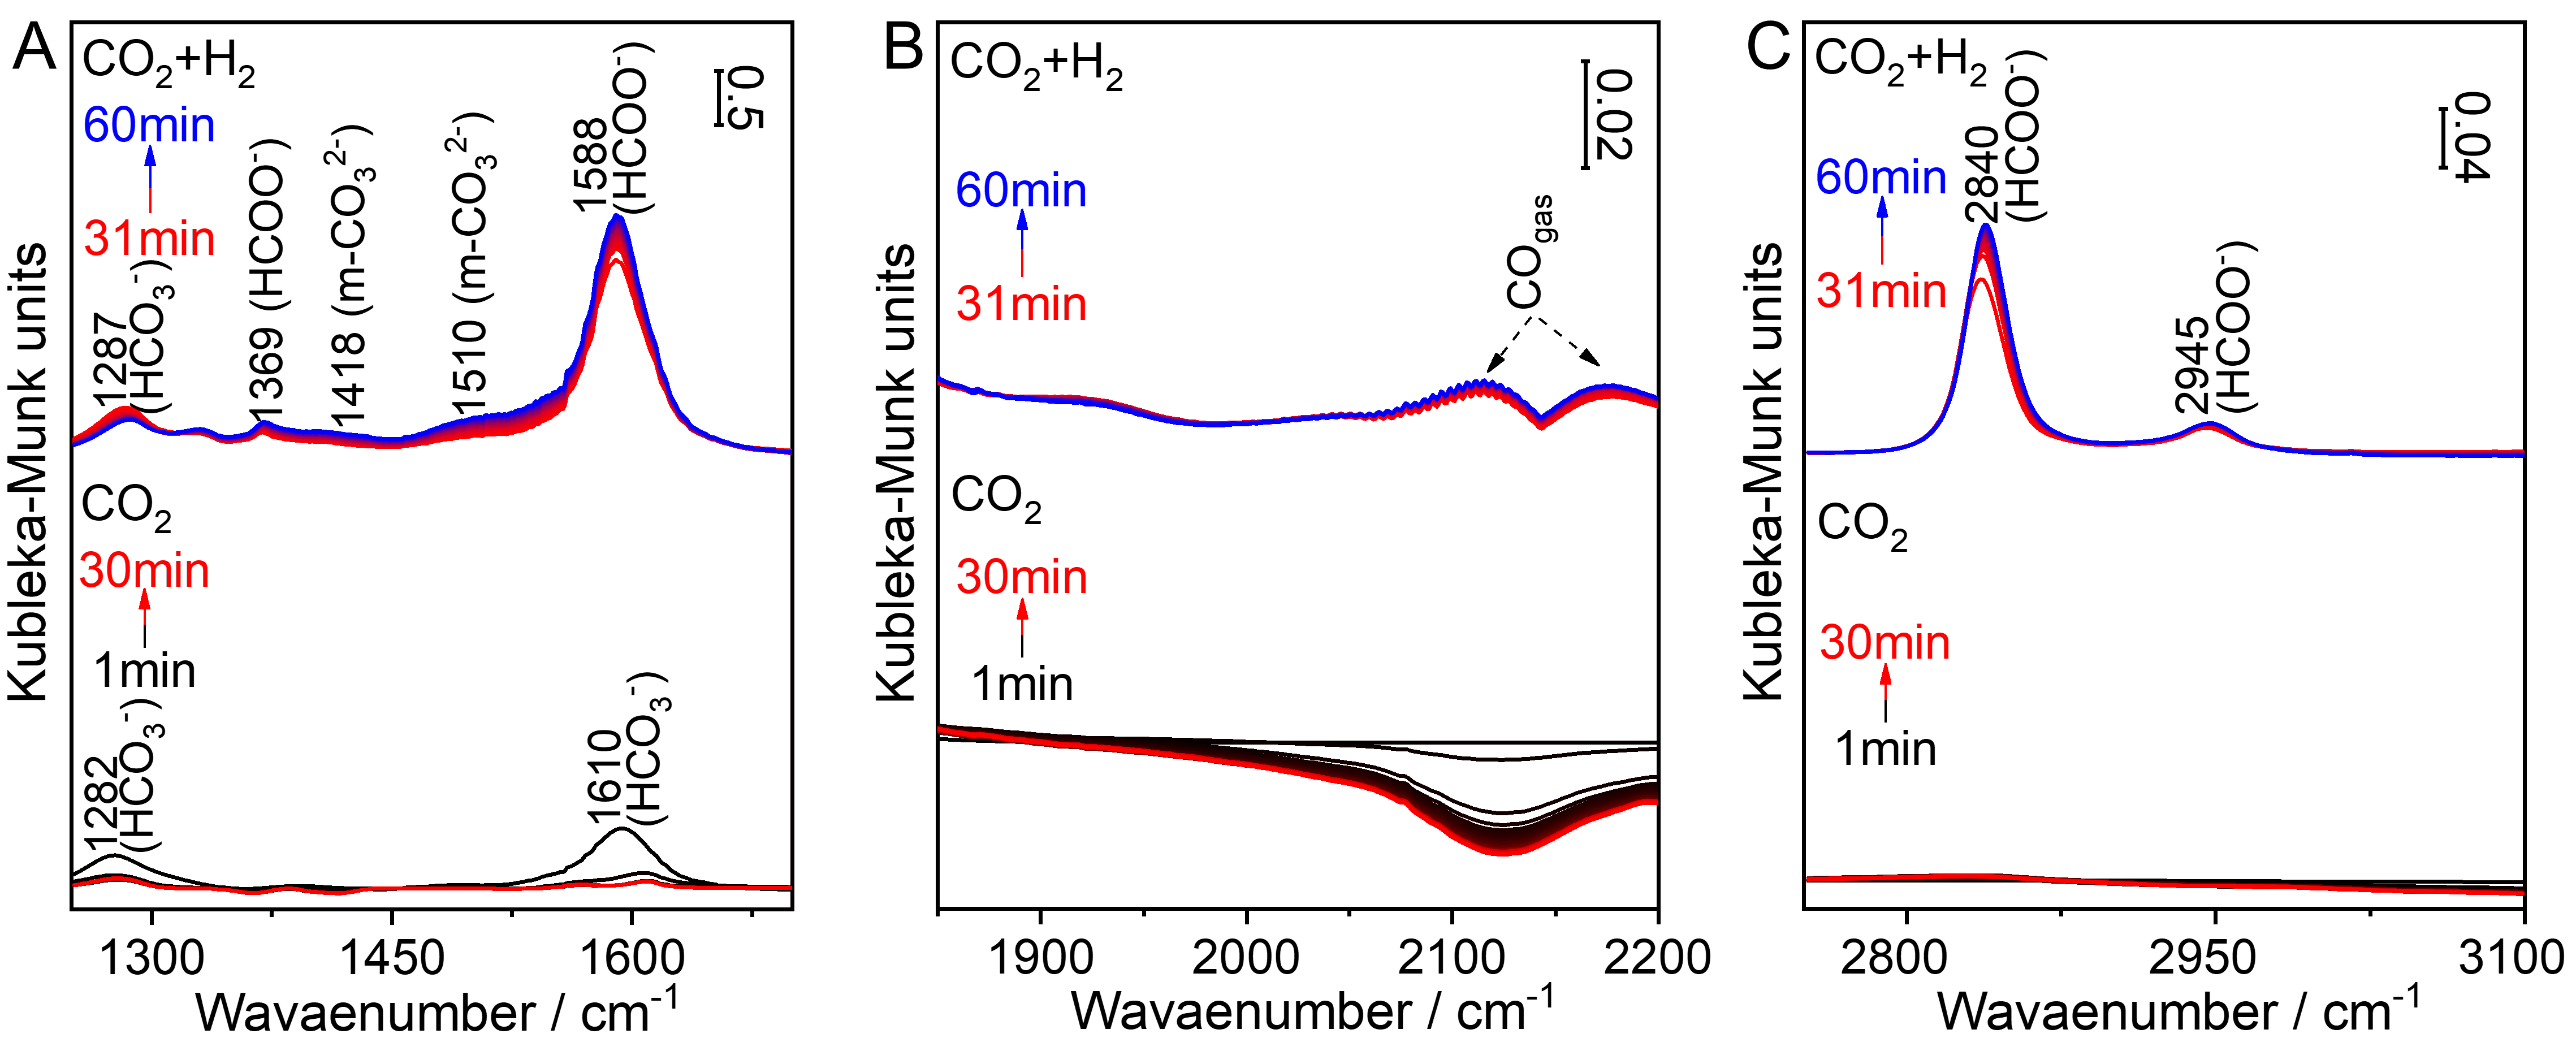
**

**Fig. S11.**In situ time-resolved DRIFTS spectra of the stepwise reactions with first CO2 activation and then transferred into CO2+H2 atmosphere at 400 oC for 30 min over 0.1%Pd/CeO2 catalyst with (A) C-O vibration region, (B) CO adsorption region, and (C) C-H vibration region.

**
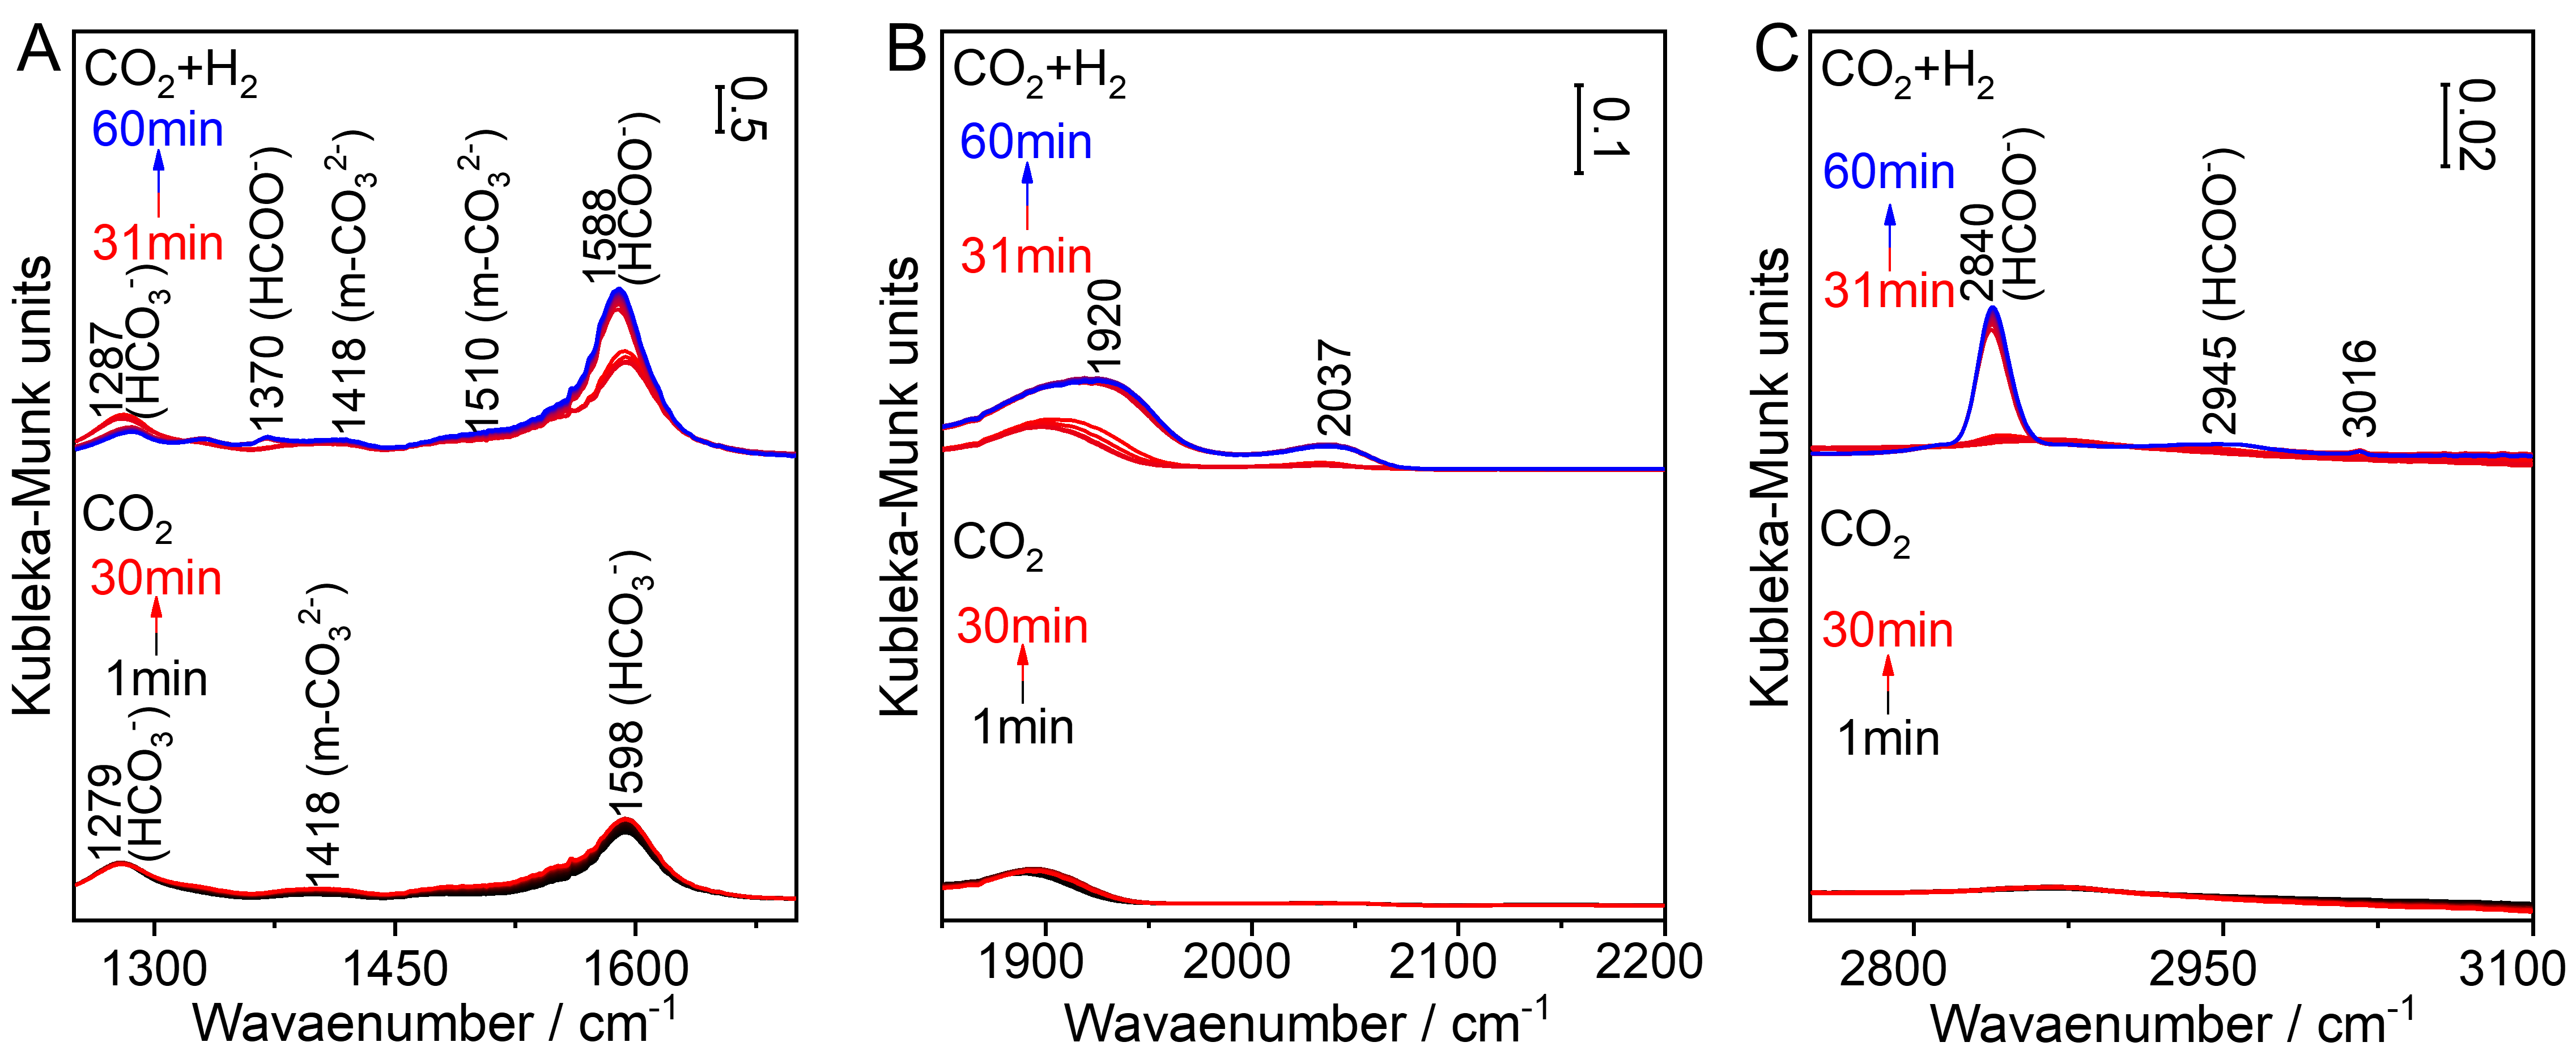
**

**Fig. S12.** In situ time-resolved DRIFTS spectra of the stepwise reactions with first CO2 activation and then transferred into CO2+H2 atmosphere at 400 oC for 30 min over 2%Pd/CeO2 catalyst with (A) C-O vibration region, (B) CO adsorption region, and (C) C-H vibration region.

**
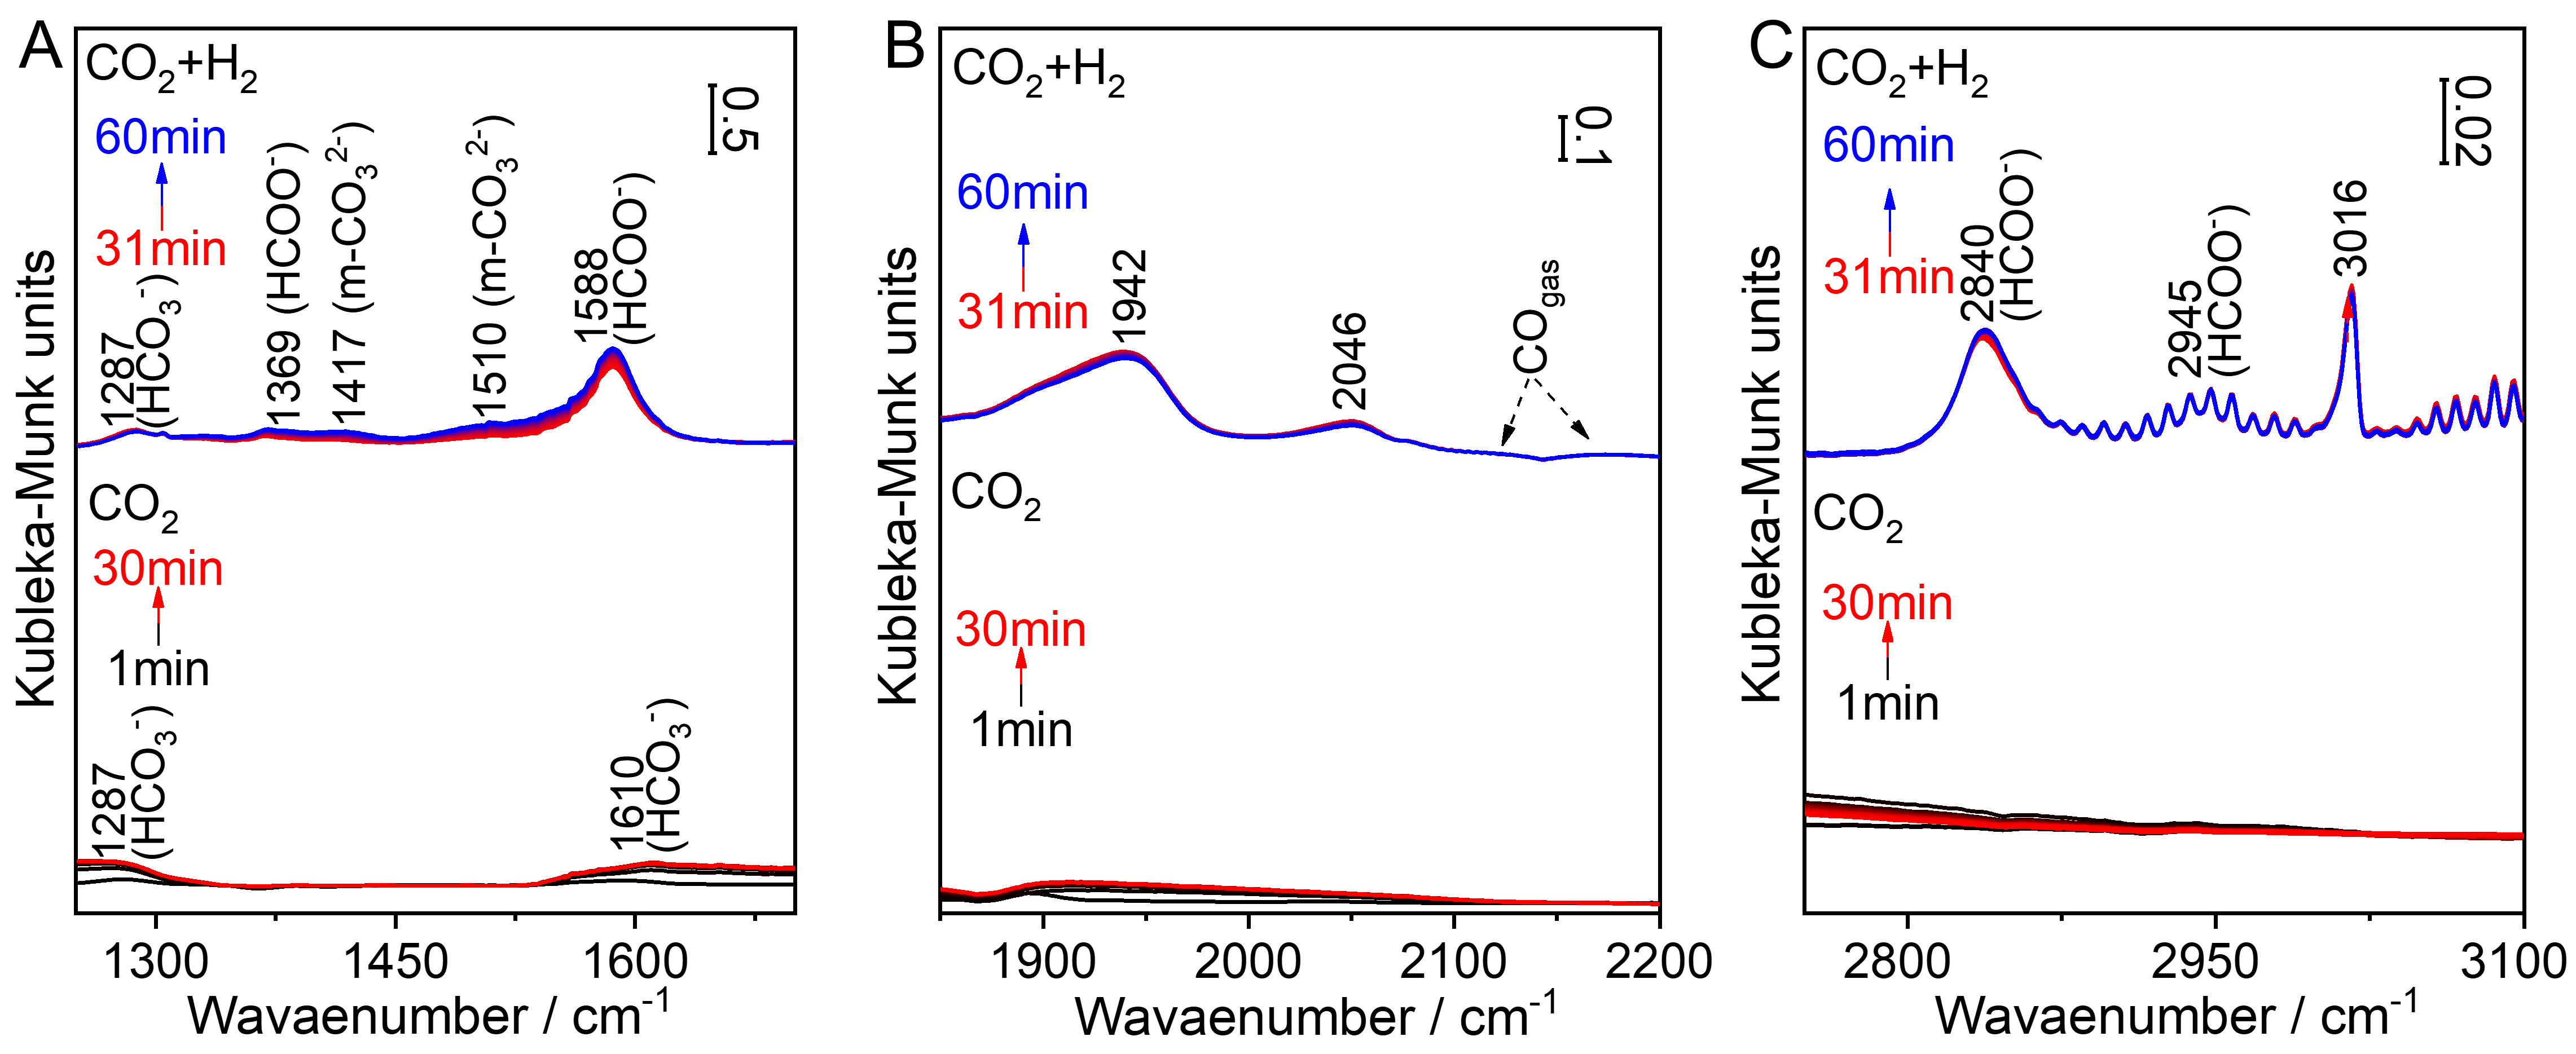
**

**Fig. S13.** In situ time-resolved DRIFTS spectra of the stepwise reactions with first CO2 activation and then transferred into CO2+H2 atmosphere at 400 oC for 30 min over 8%Pd/CeO2 catalyst with (A) C-O vibration region, (B) CO adsorption region, and (C) C-H vibration region.

**
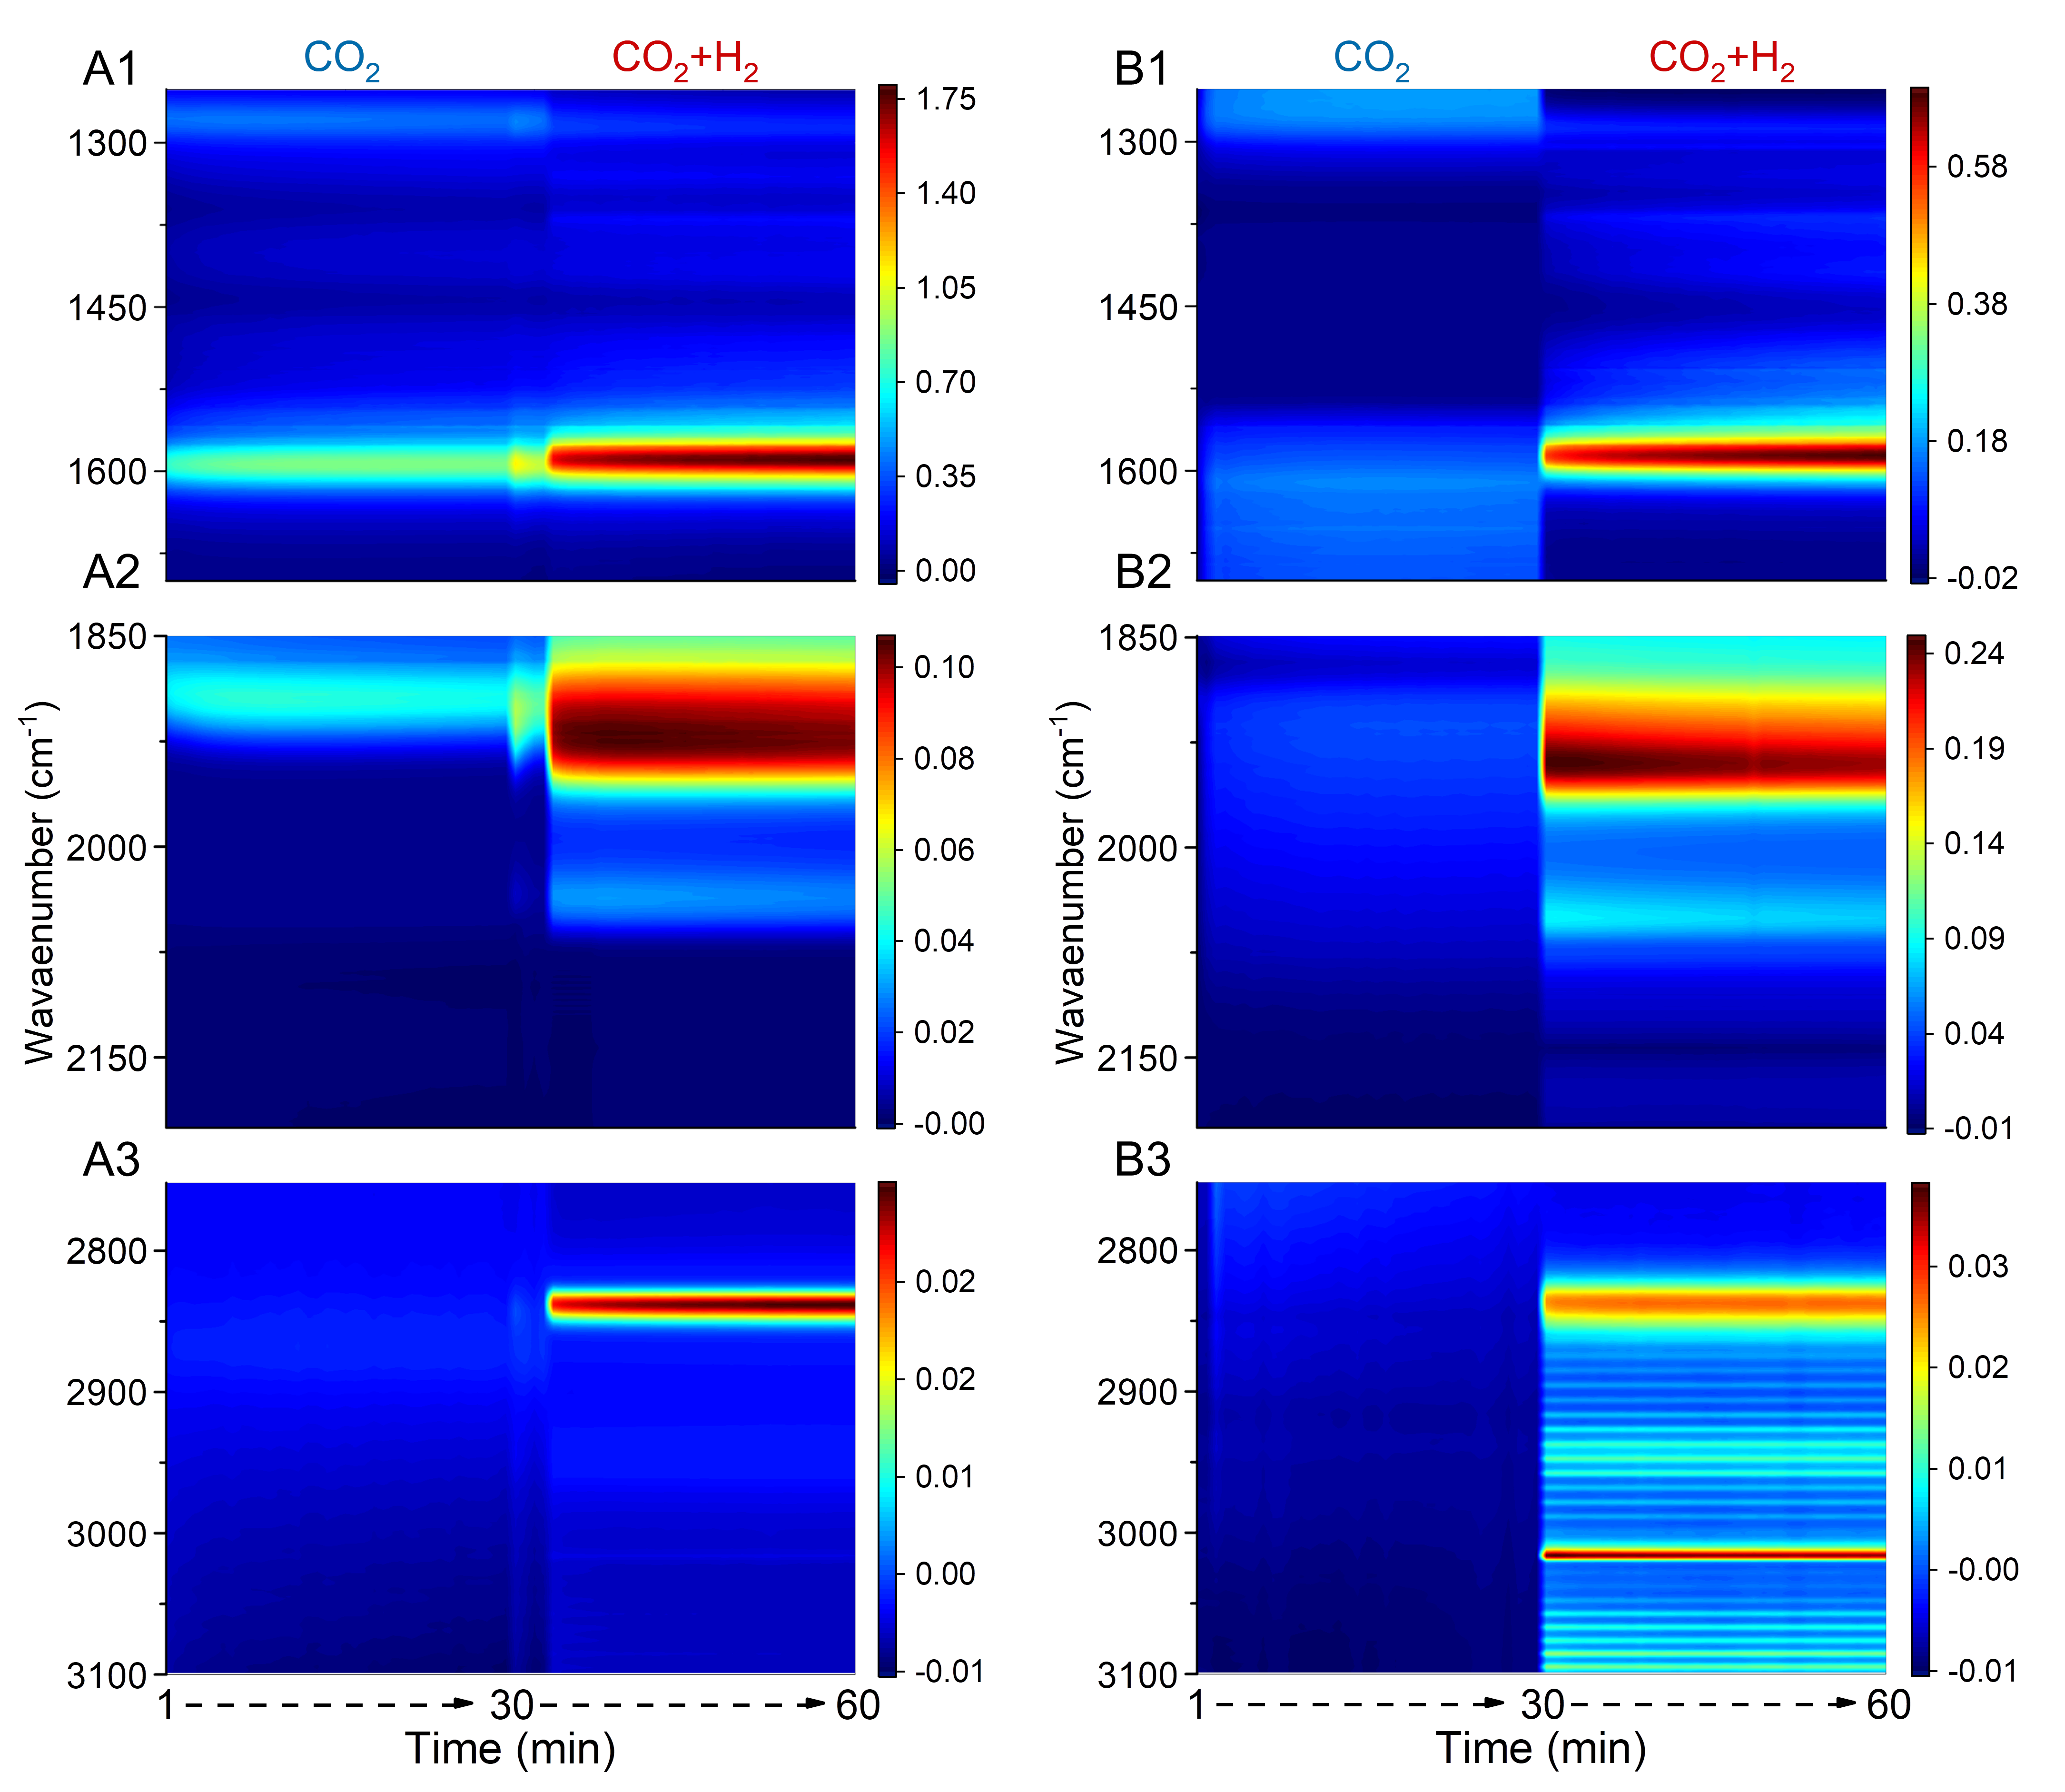
**

**Fig. S14.** In situ time-resolved DRIFTS spectra of the stepwise reactions with first CO2 activation and then transferred to CO2+H2 atmosphere at 400 oC for 30 min over (A1-A3) 2%Pd/CeO2 and (B1-B3) 8%Pd/CeO2 catalysts with different vibration regions.

**
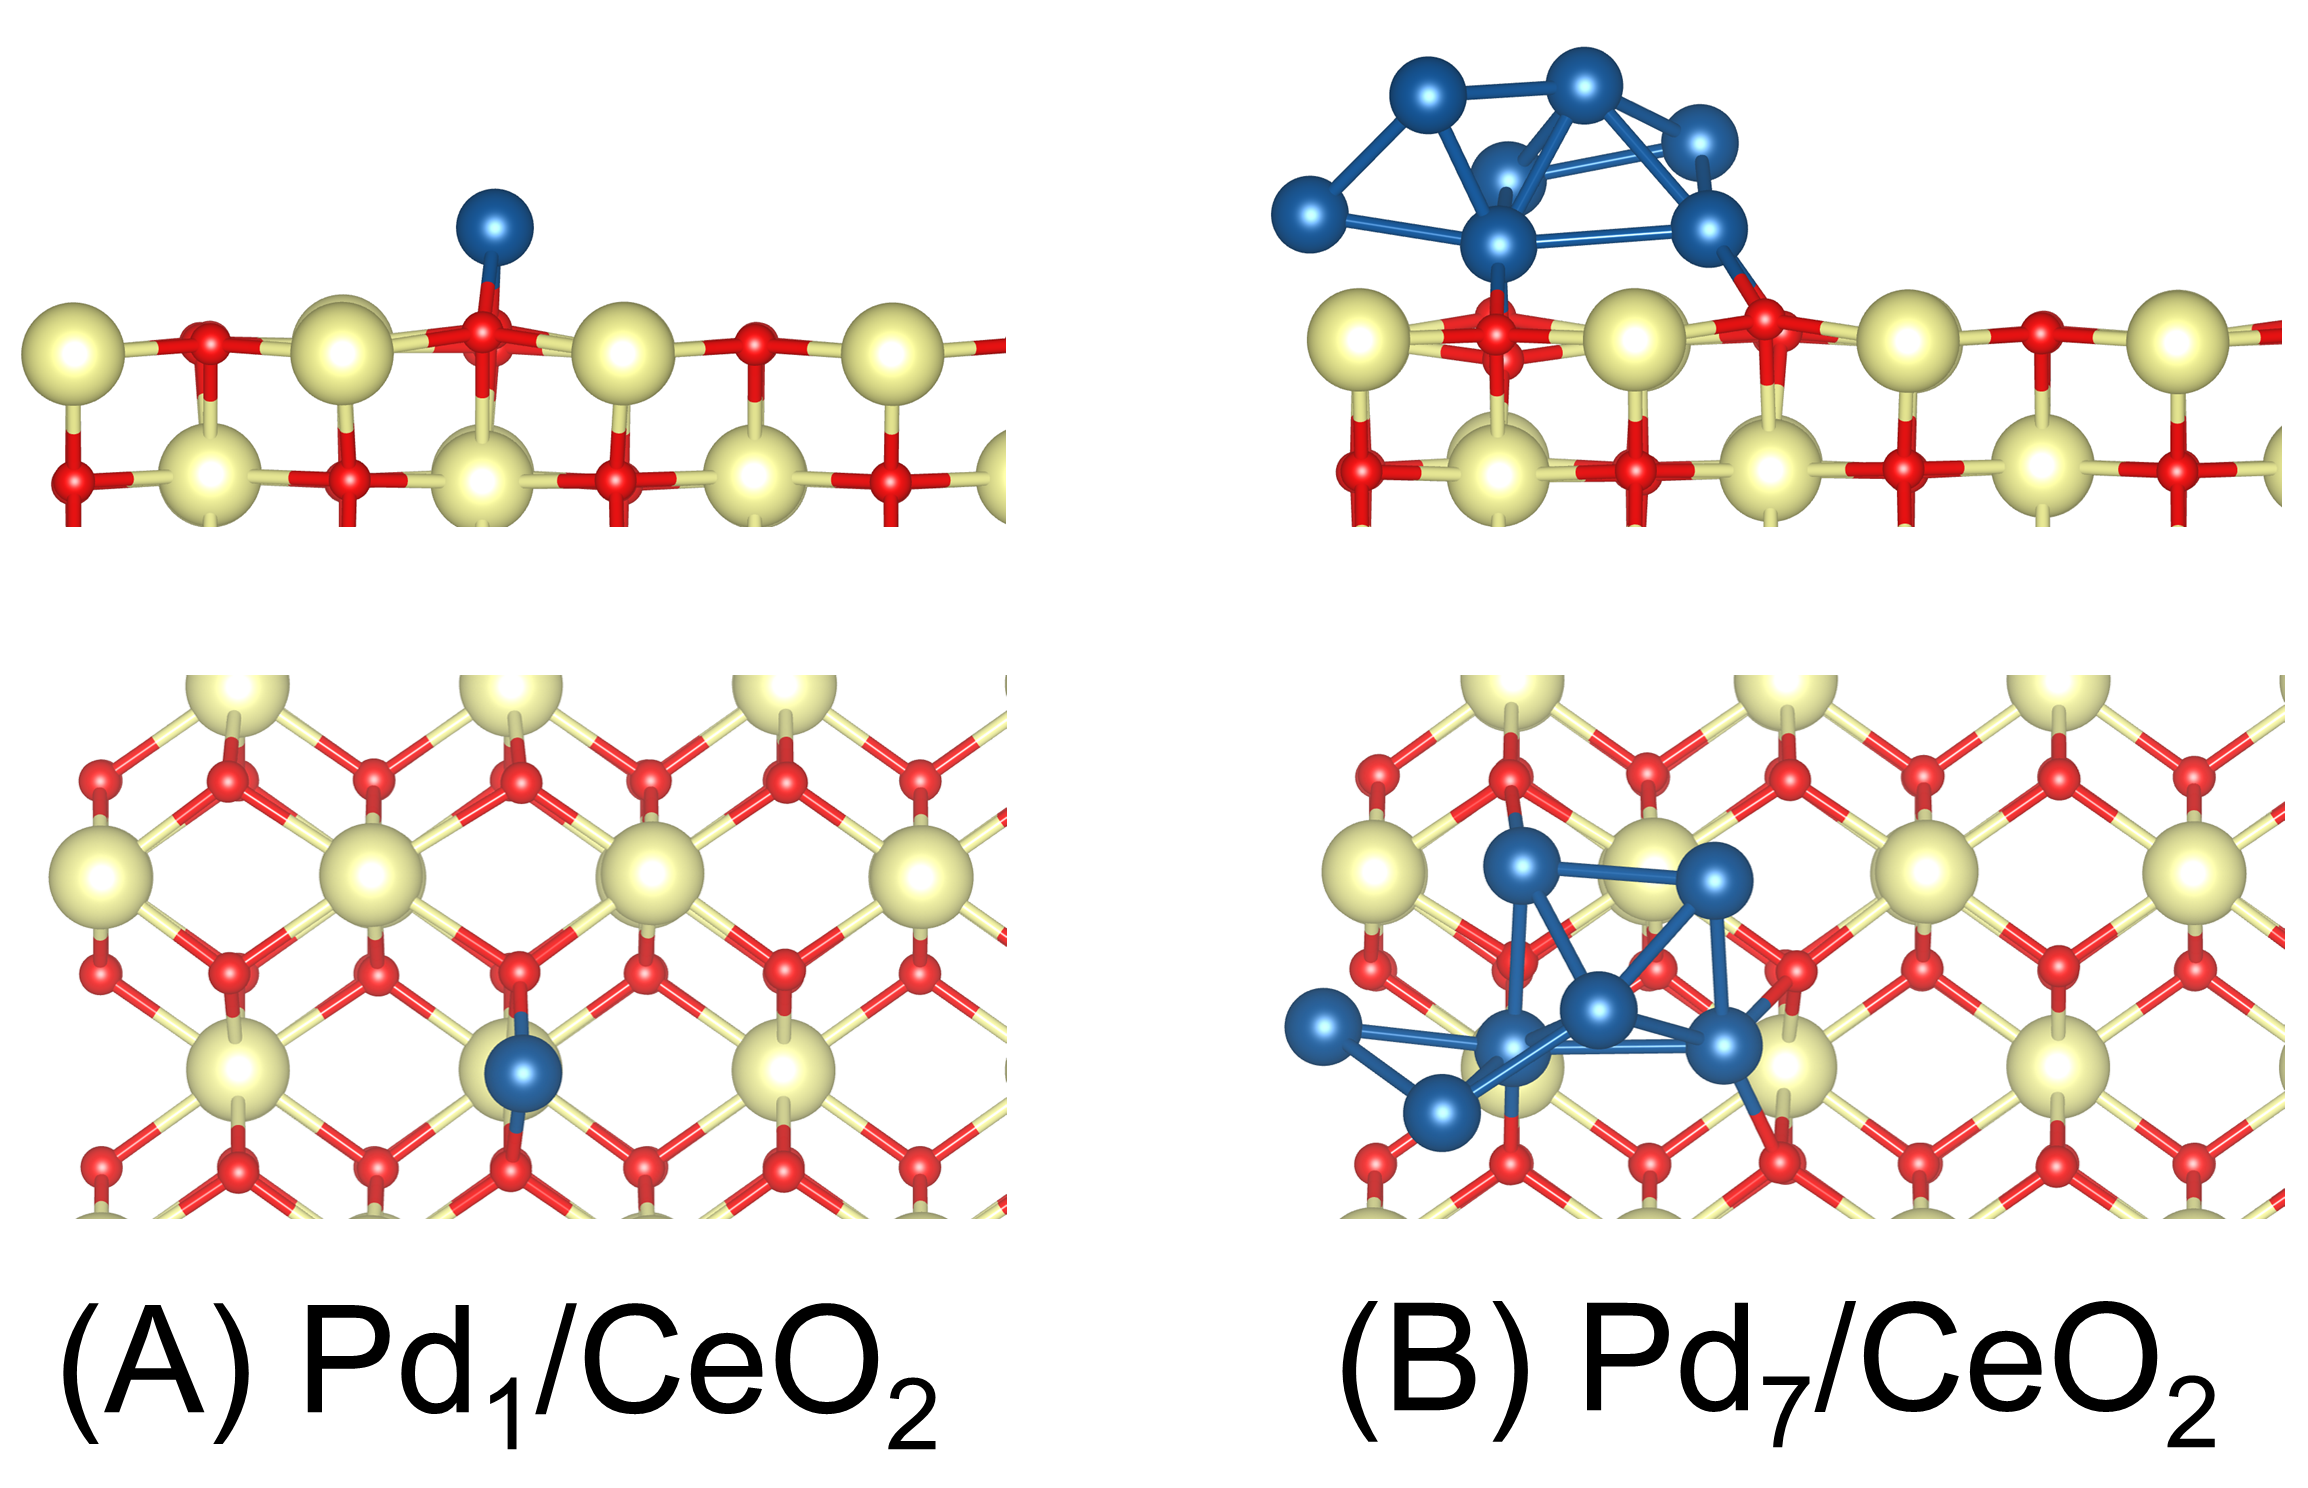
**

**Fig. S15.** The optimized structures of (A) Pd1/CeO2 and (B) Pd7/CeO2 models viewed through different angles (front view and top view). Ce, O, and Pd atoms are shown in lemon chiffon, red, and medium blue, respectively.

**
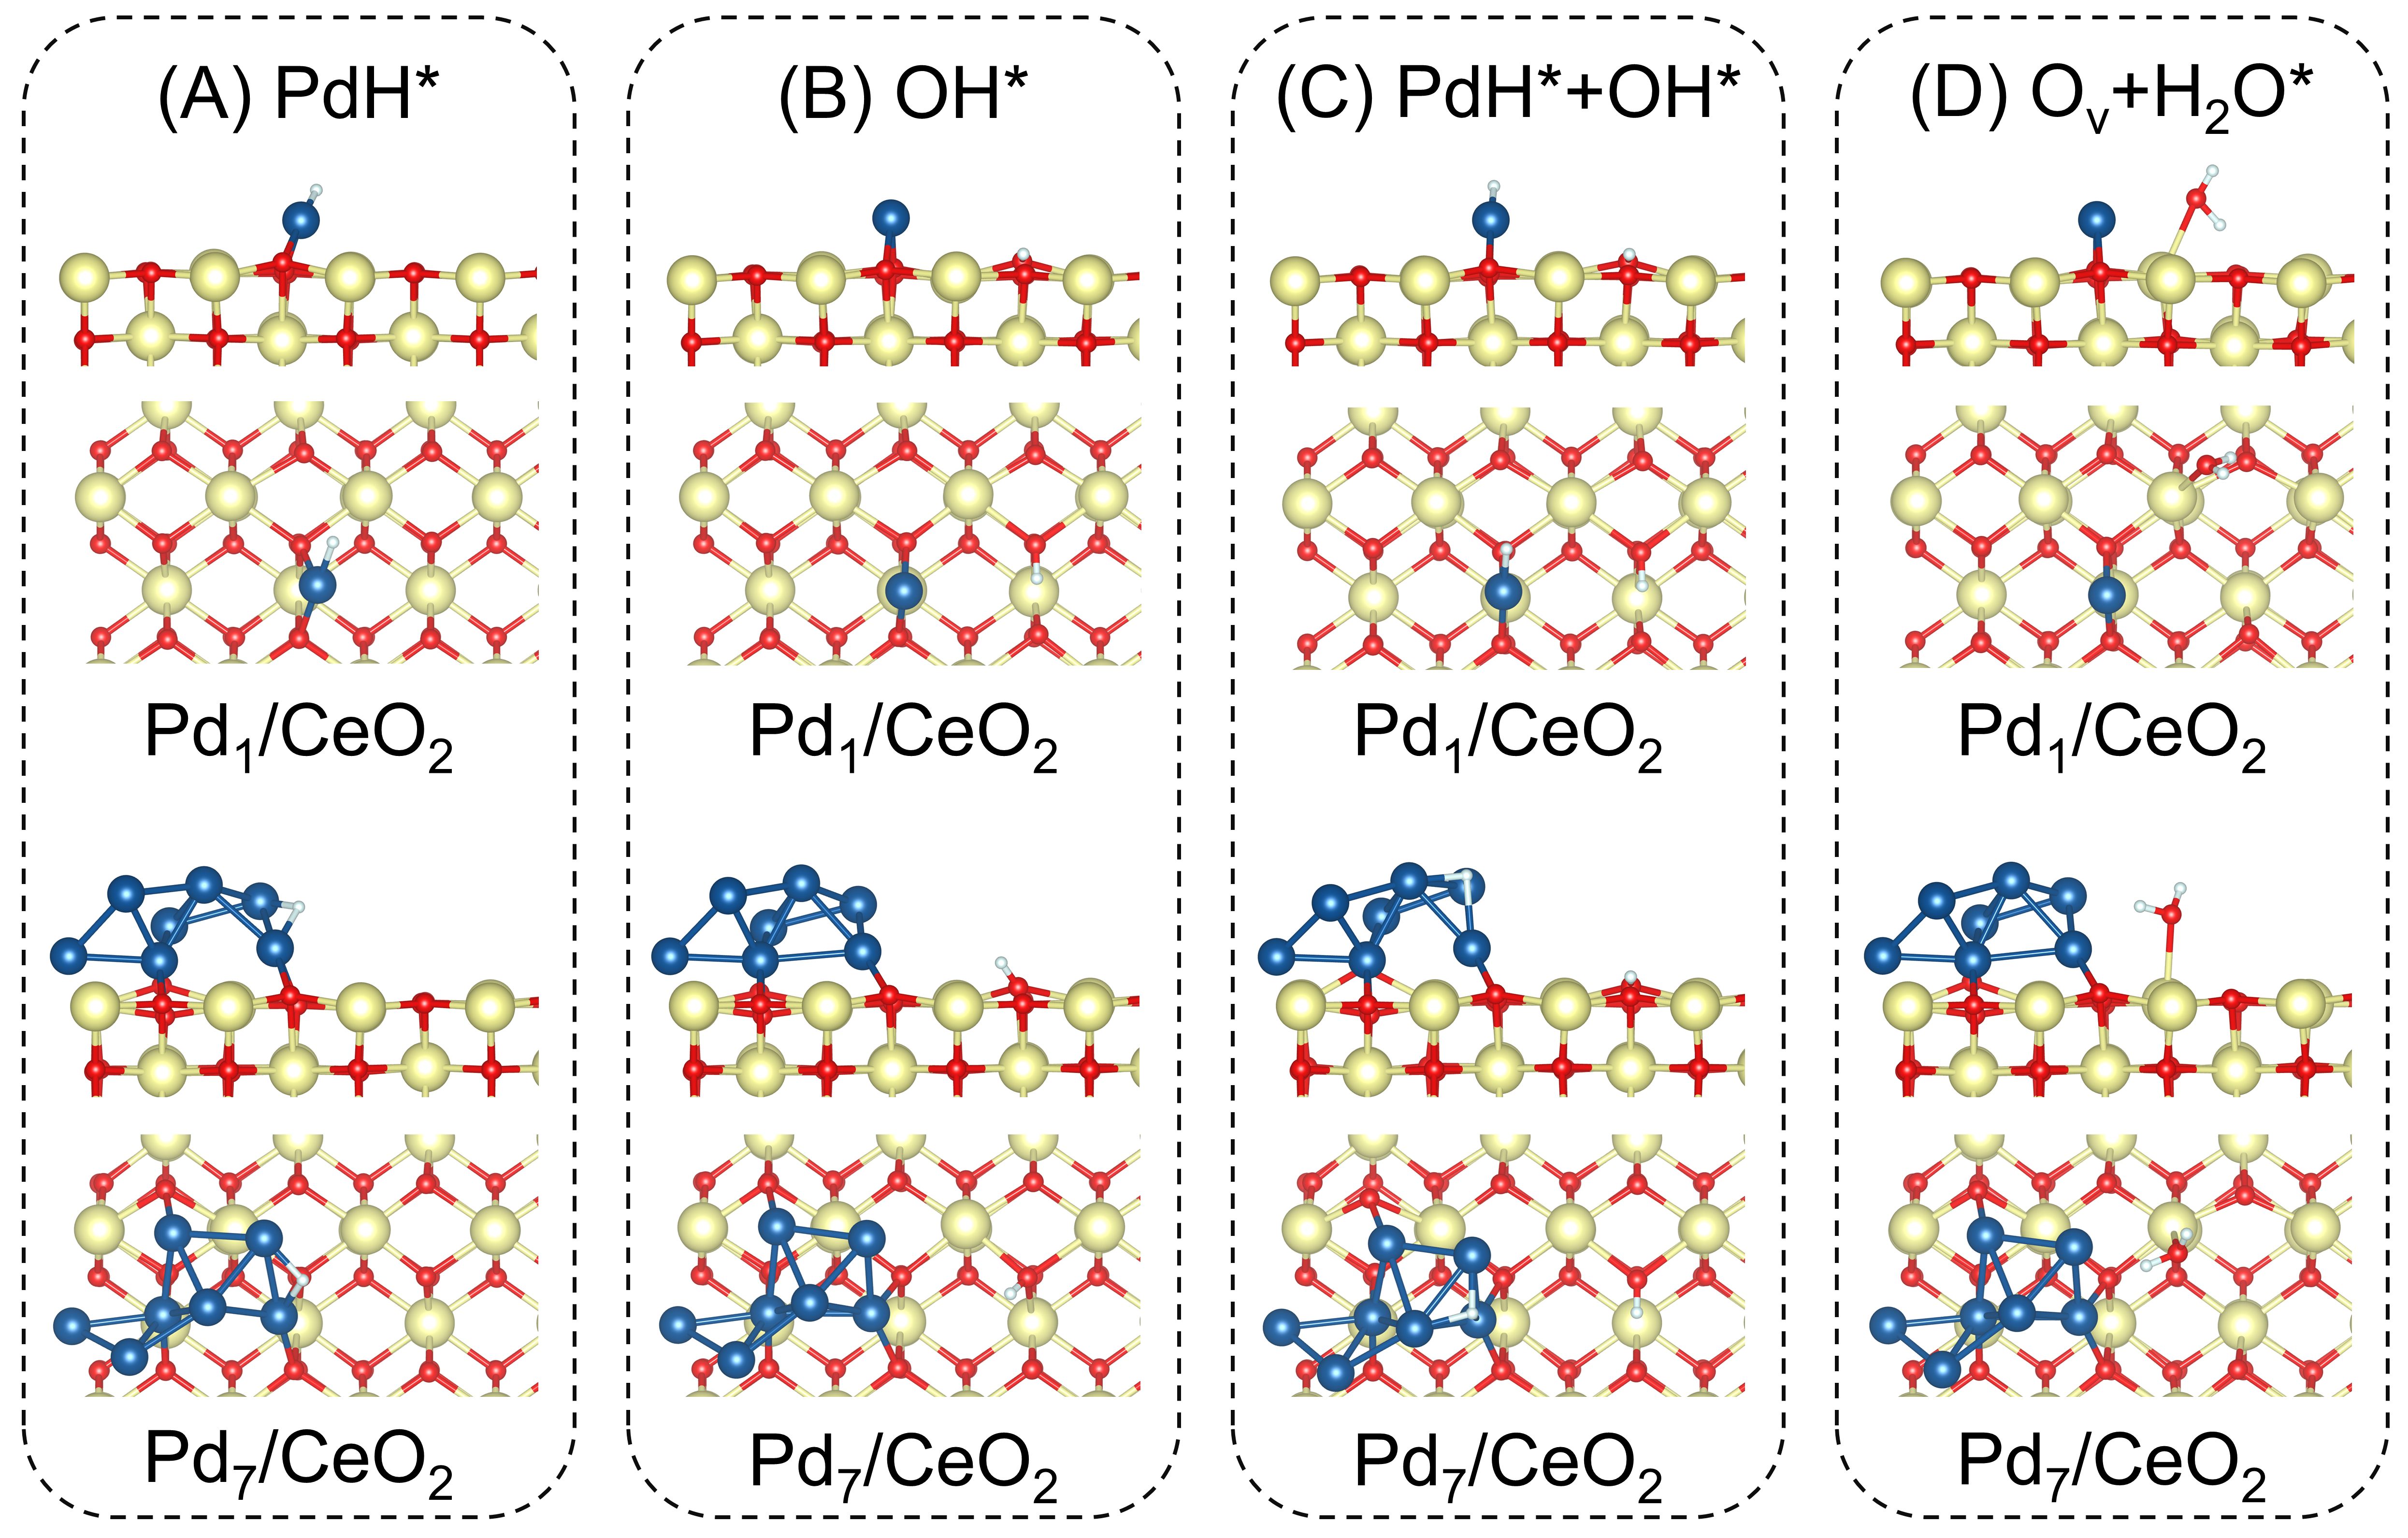
**

**Fig. S16.** The optimized structures of (A) PdH*, (B) OH*, (C) PdH*+OH*, and (D) Ov+H2O adsorption on both Pd/CeO2 surfaces viewed through different angles (front view and top view). Ce, O, Pd, and H atoms are shown in lemon chiffon, red, medium blue, and azure spheres, respectively.

**
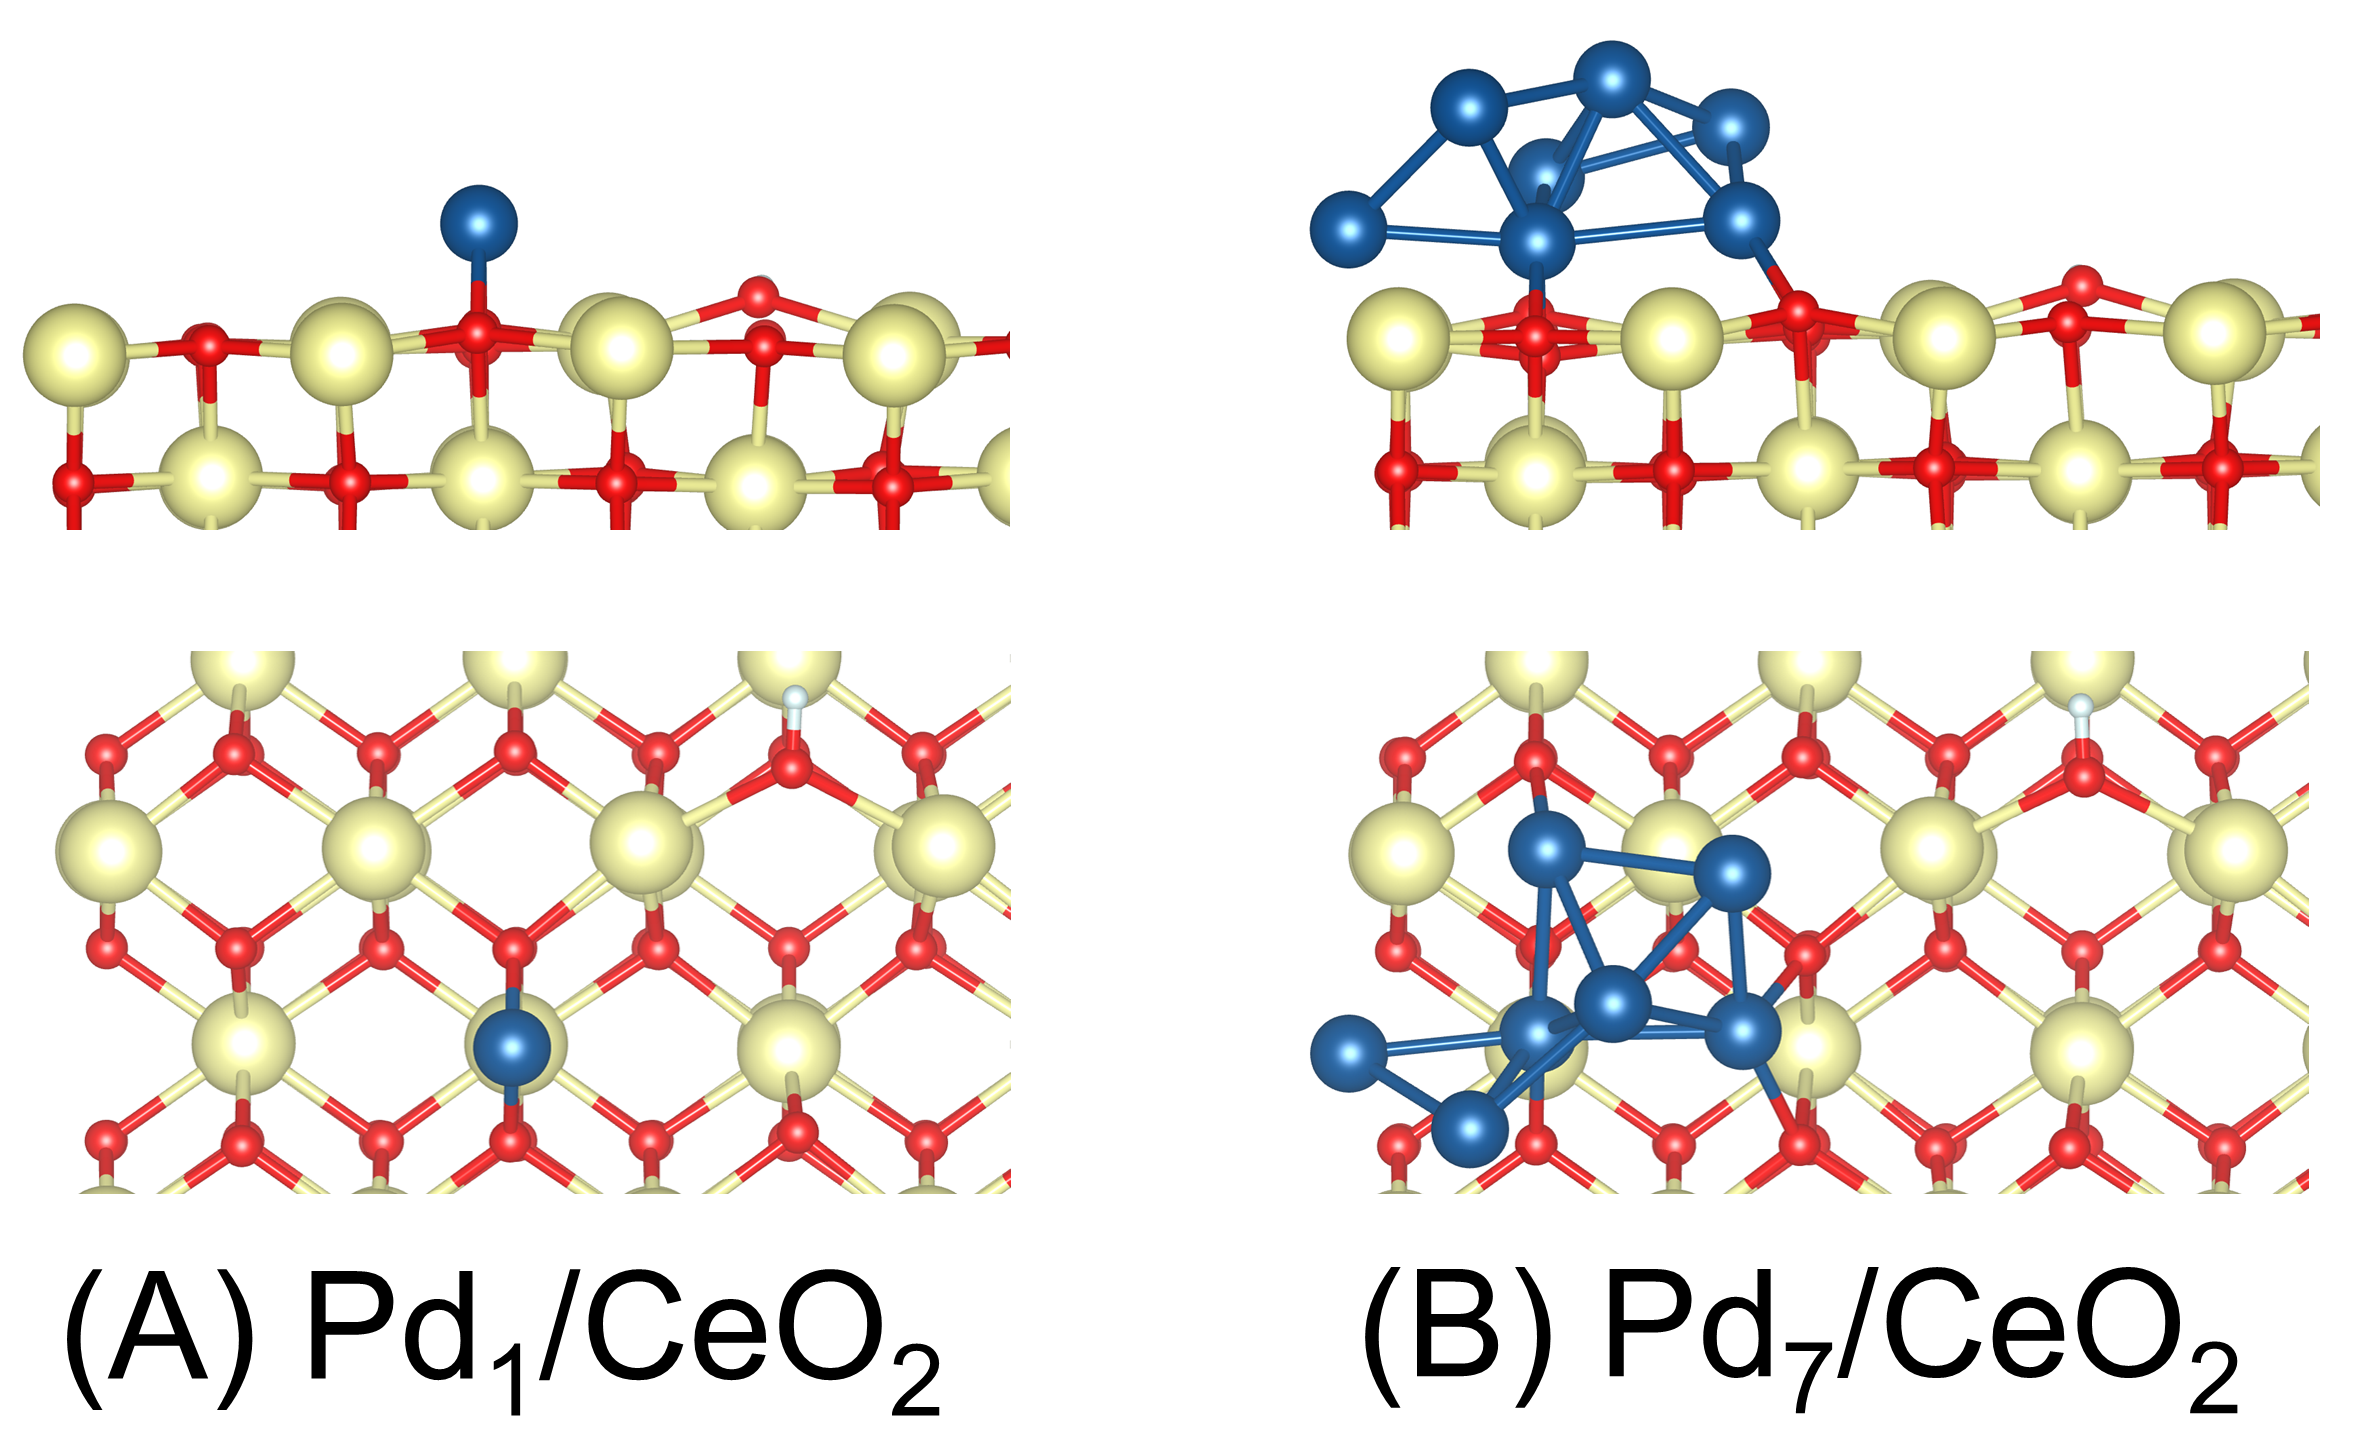
**

**Fig. S17.** The optimized Ov+OH* structures over (A) Pd1/CeO2 and (B) Pd7/CeO2 surfaces viewed through different angles (front view and top view). Ce, O, Pd, and H atoms are shown in lemon chiffon, red, medium blue, and azure spheres, respectively.

**
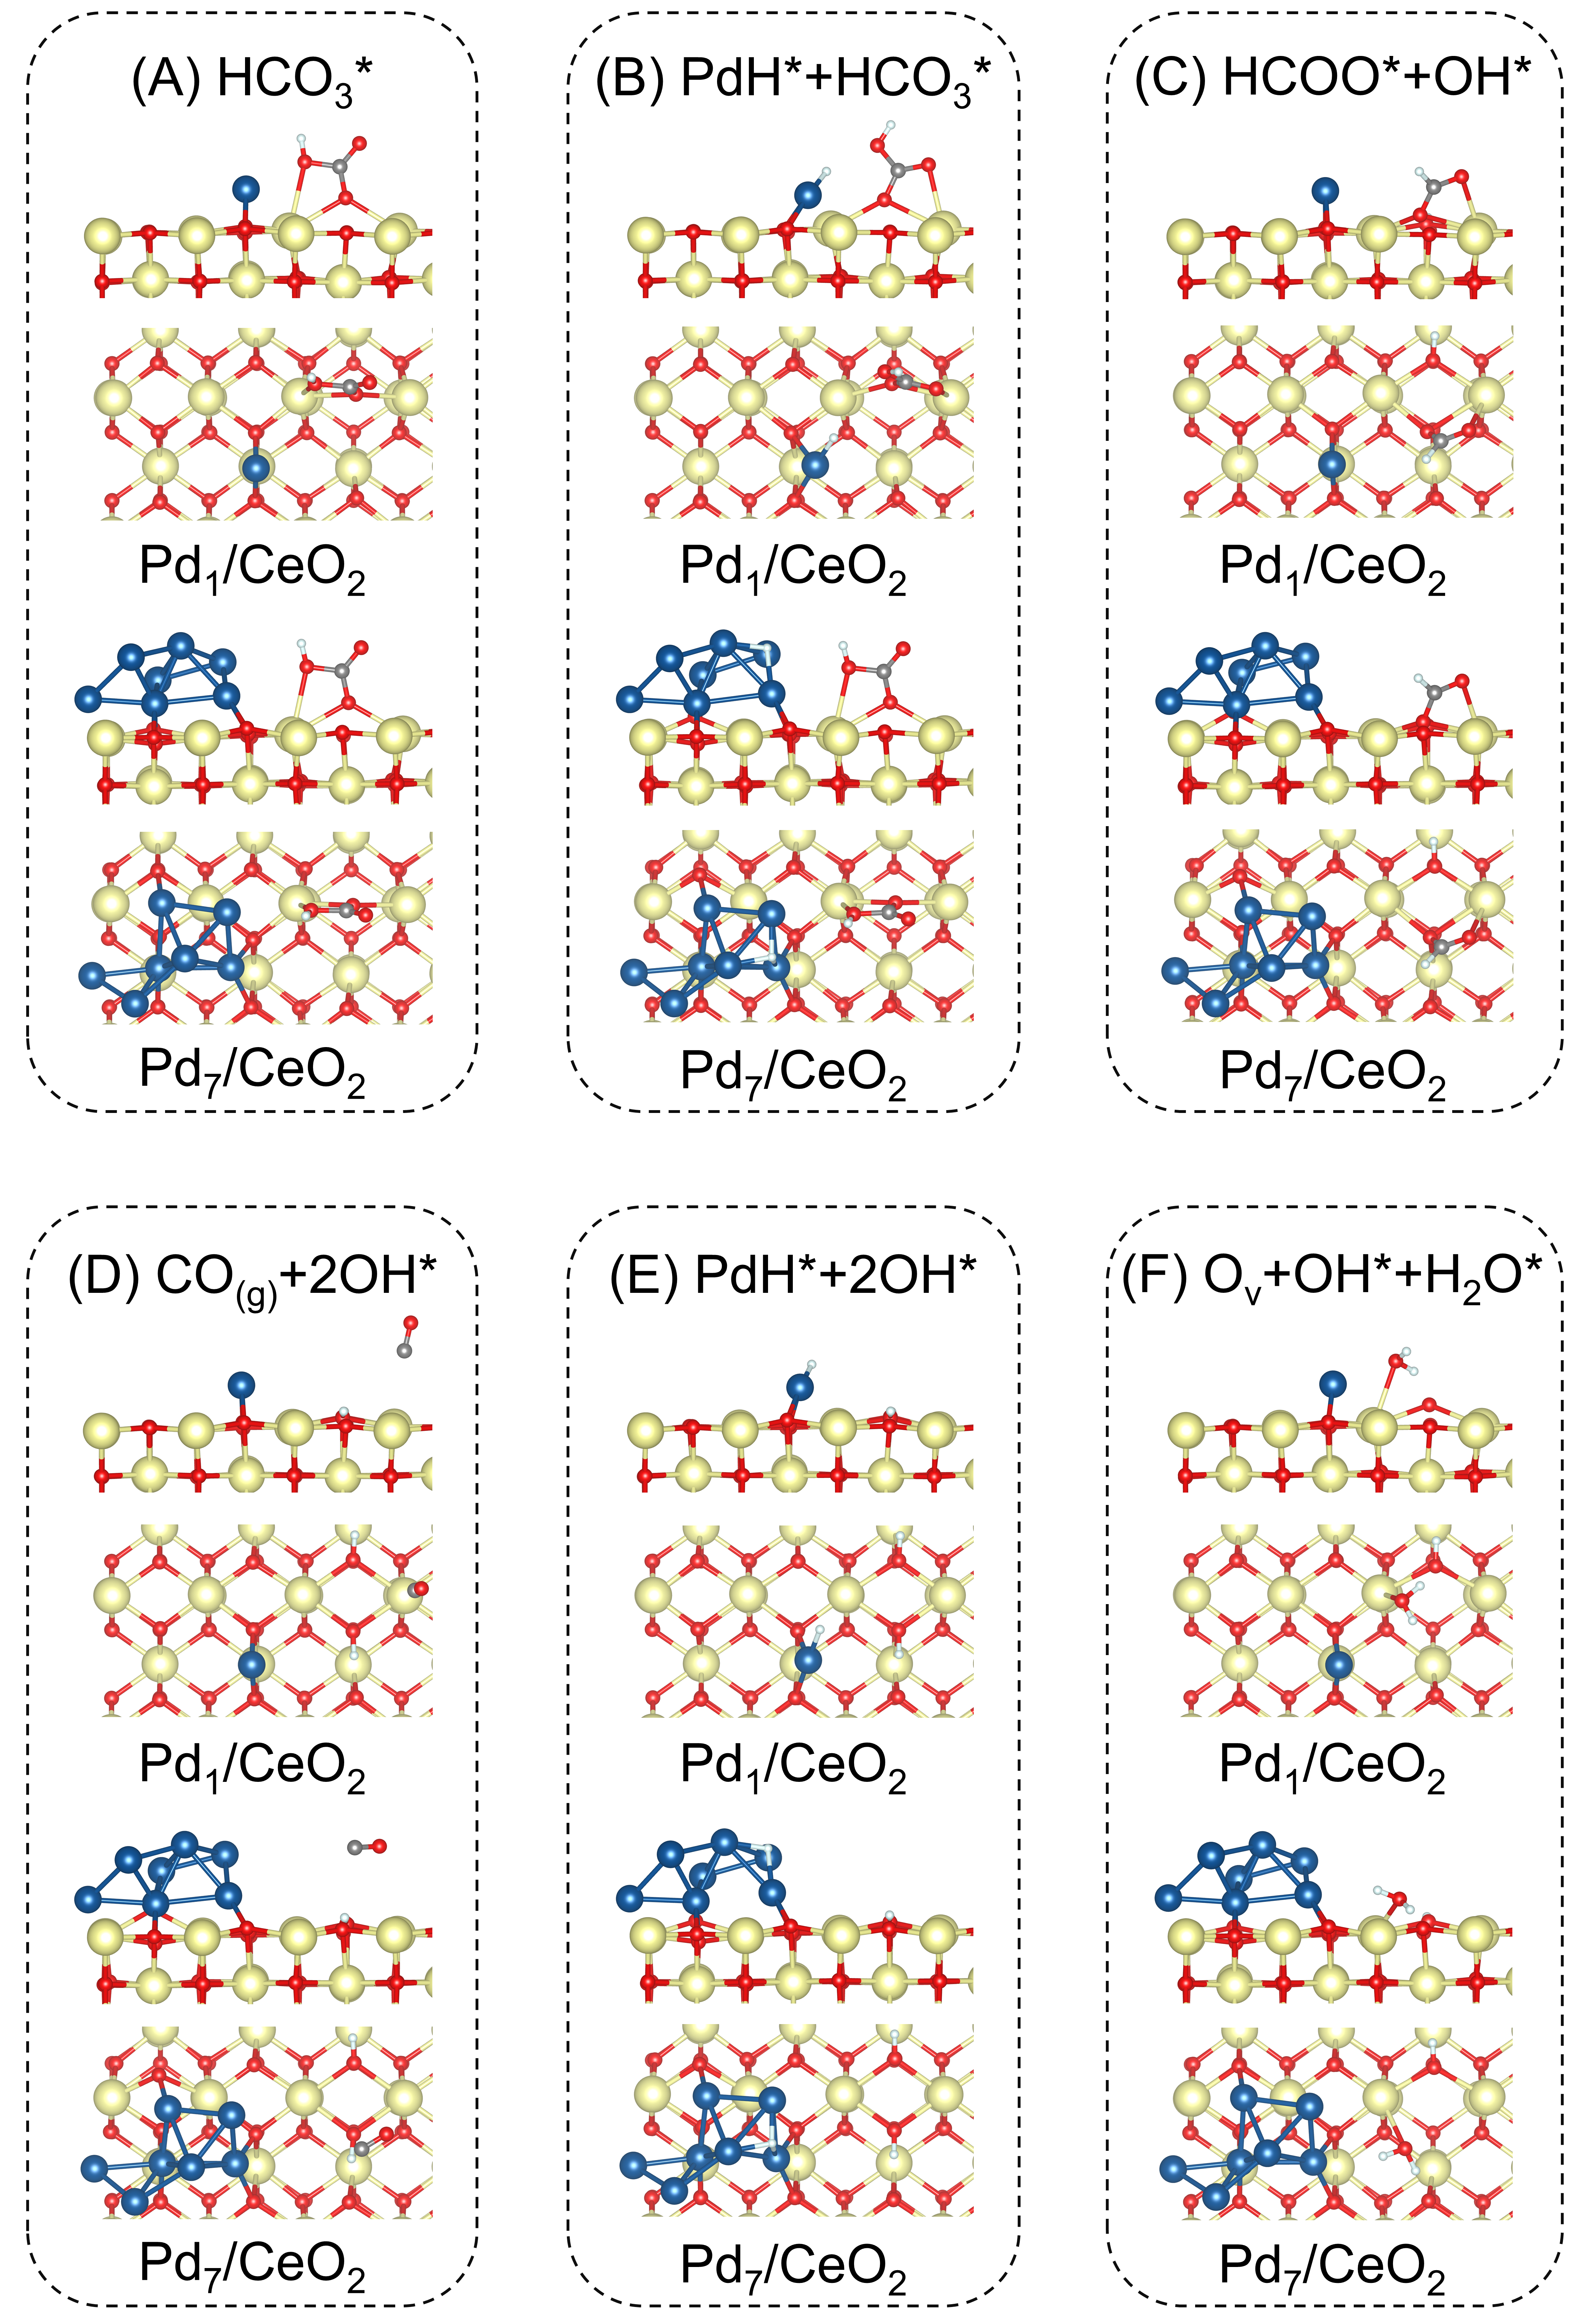
**

**Fig. S18.** The optimized structures of (A) HCO3*, (B) PdH*+HCO3*, (C) HCOO*+OH*, (D) CO(g)+2OH*, (E) PdH*+2OH*, and (F) Ov+OH*+H2O adsorption on both Pd/CeO2 surfaces viewed through different angles (front view and top view). Ce, O, Pd, C, and H atoms are shown in lemon chiffon, red, medium blue, gray, and azure spheres, respectively.


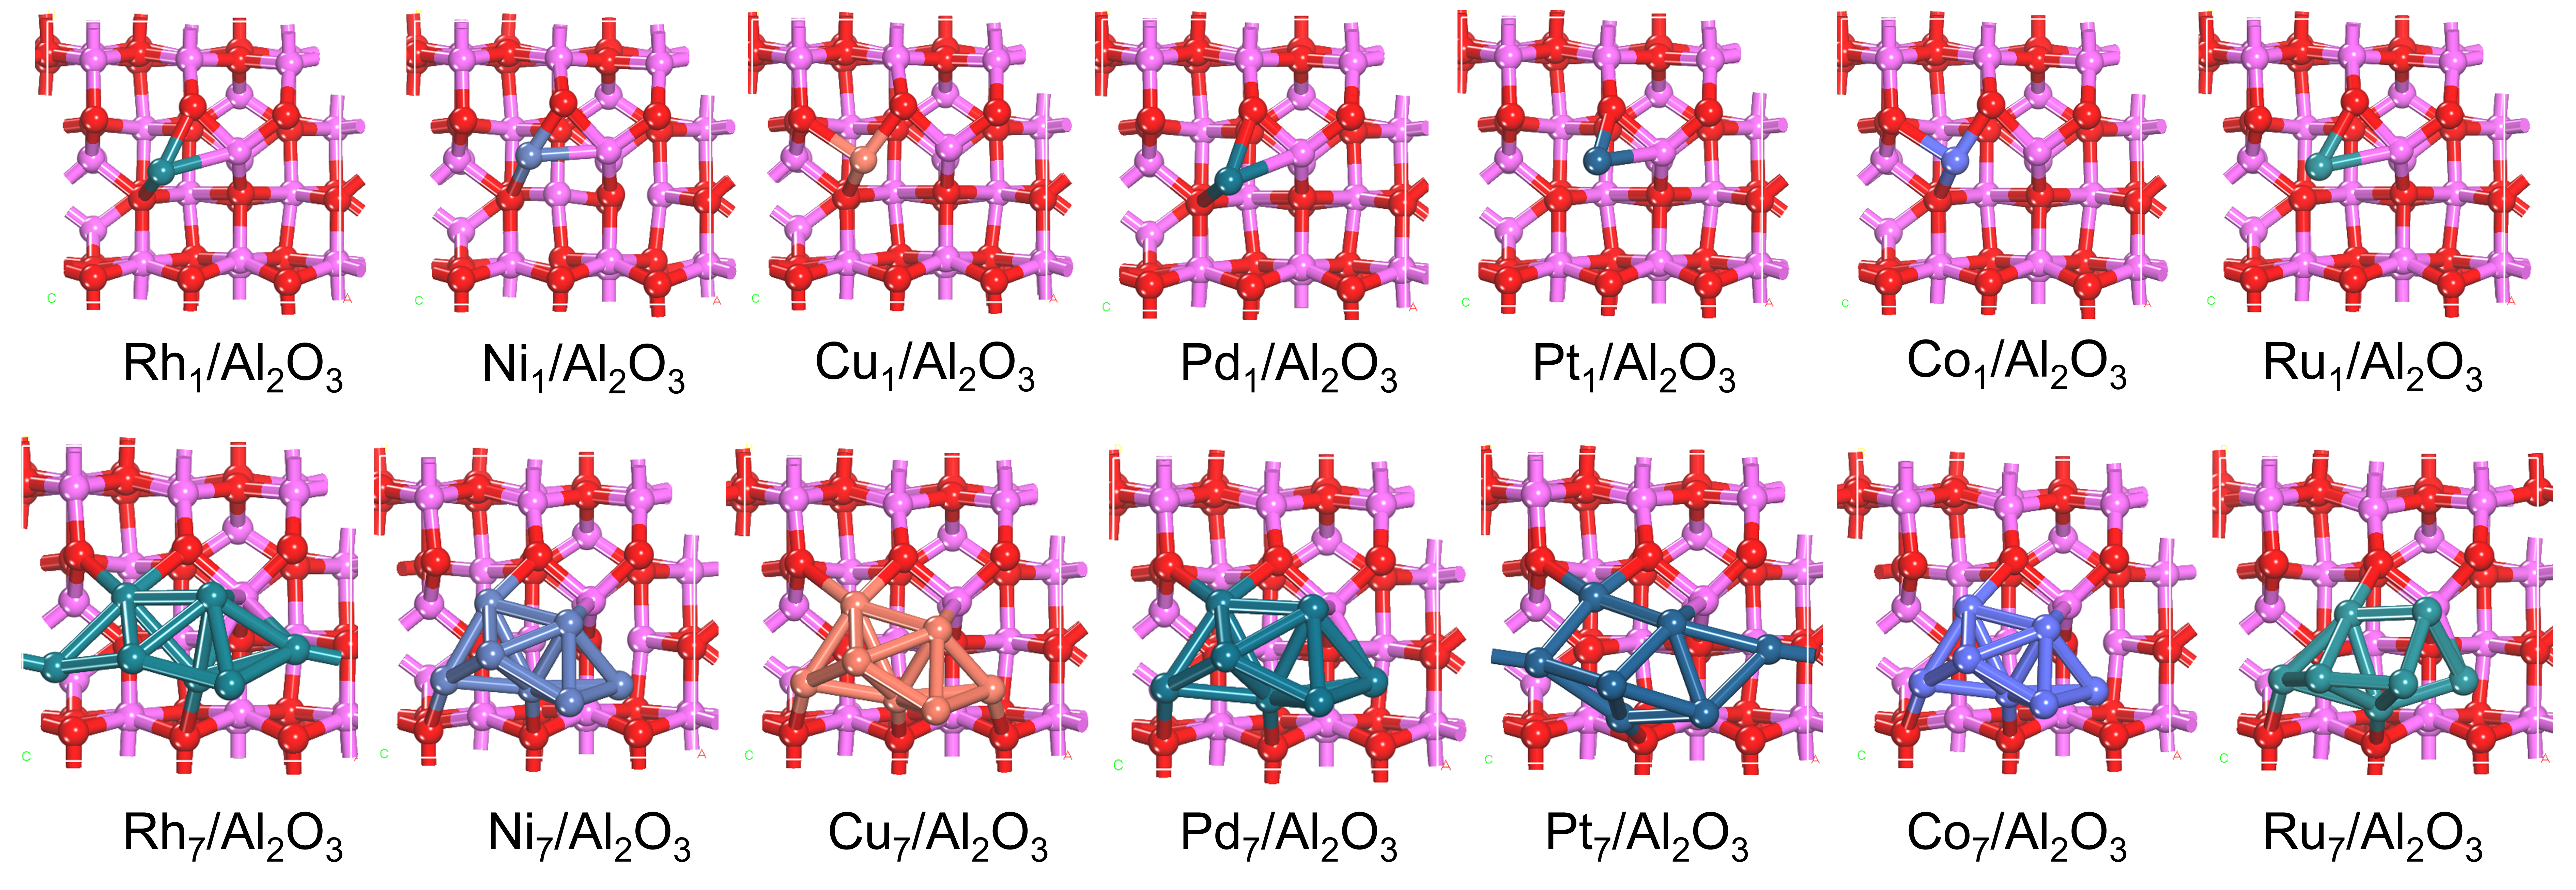


**Fig. S19.** The configurations of M1/Al2O3 and M7/Al2O3 (M = Rh, Ni, Cu, Pd, Pt, Co, Ru). Pink spheres represent Ce, red spheres represent O, teal spheres represent Rh, slateblue spheres represent Ni, orange spheres represent Cu, dark slategrey spheres represent Pd, dark blue spheres represent Pt, medium slateblue spheres represent Co, dark cyan spheres represent Ru.


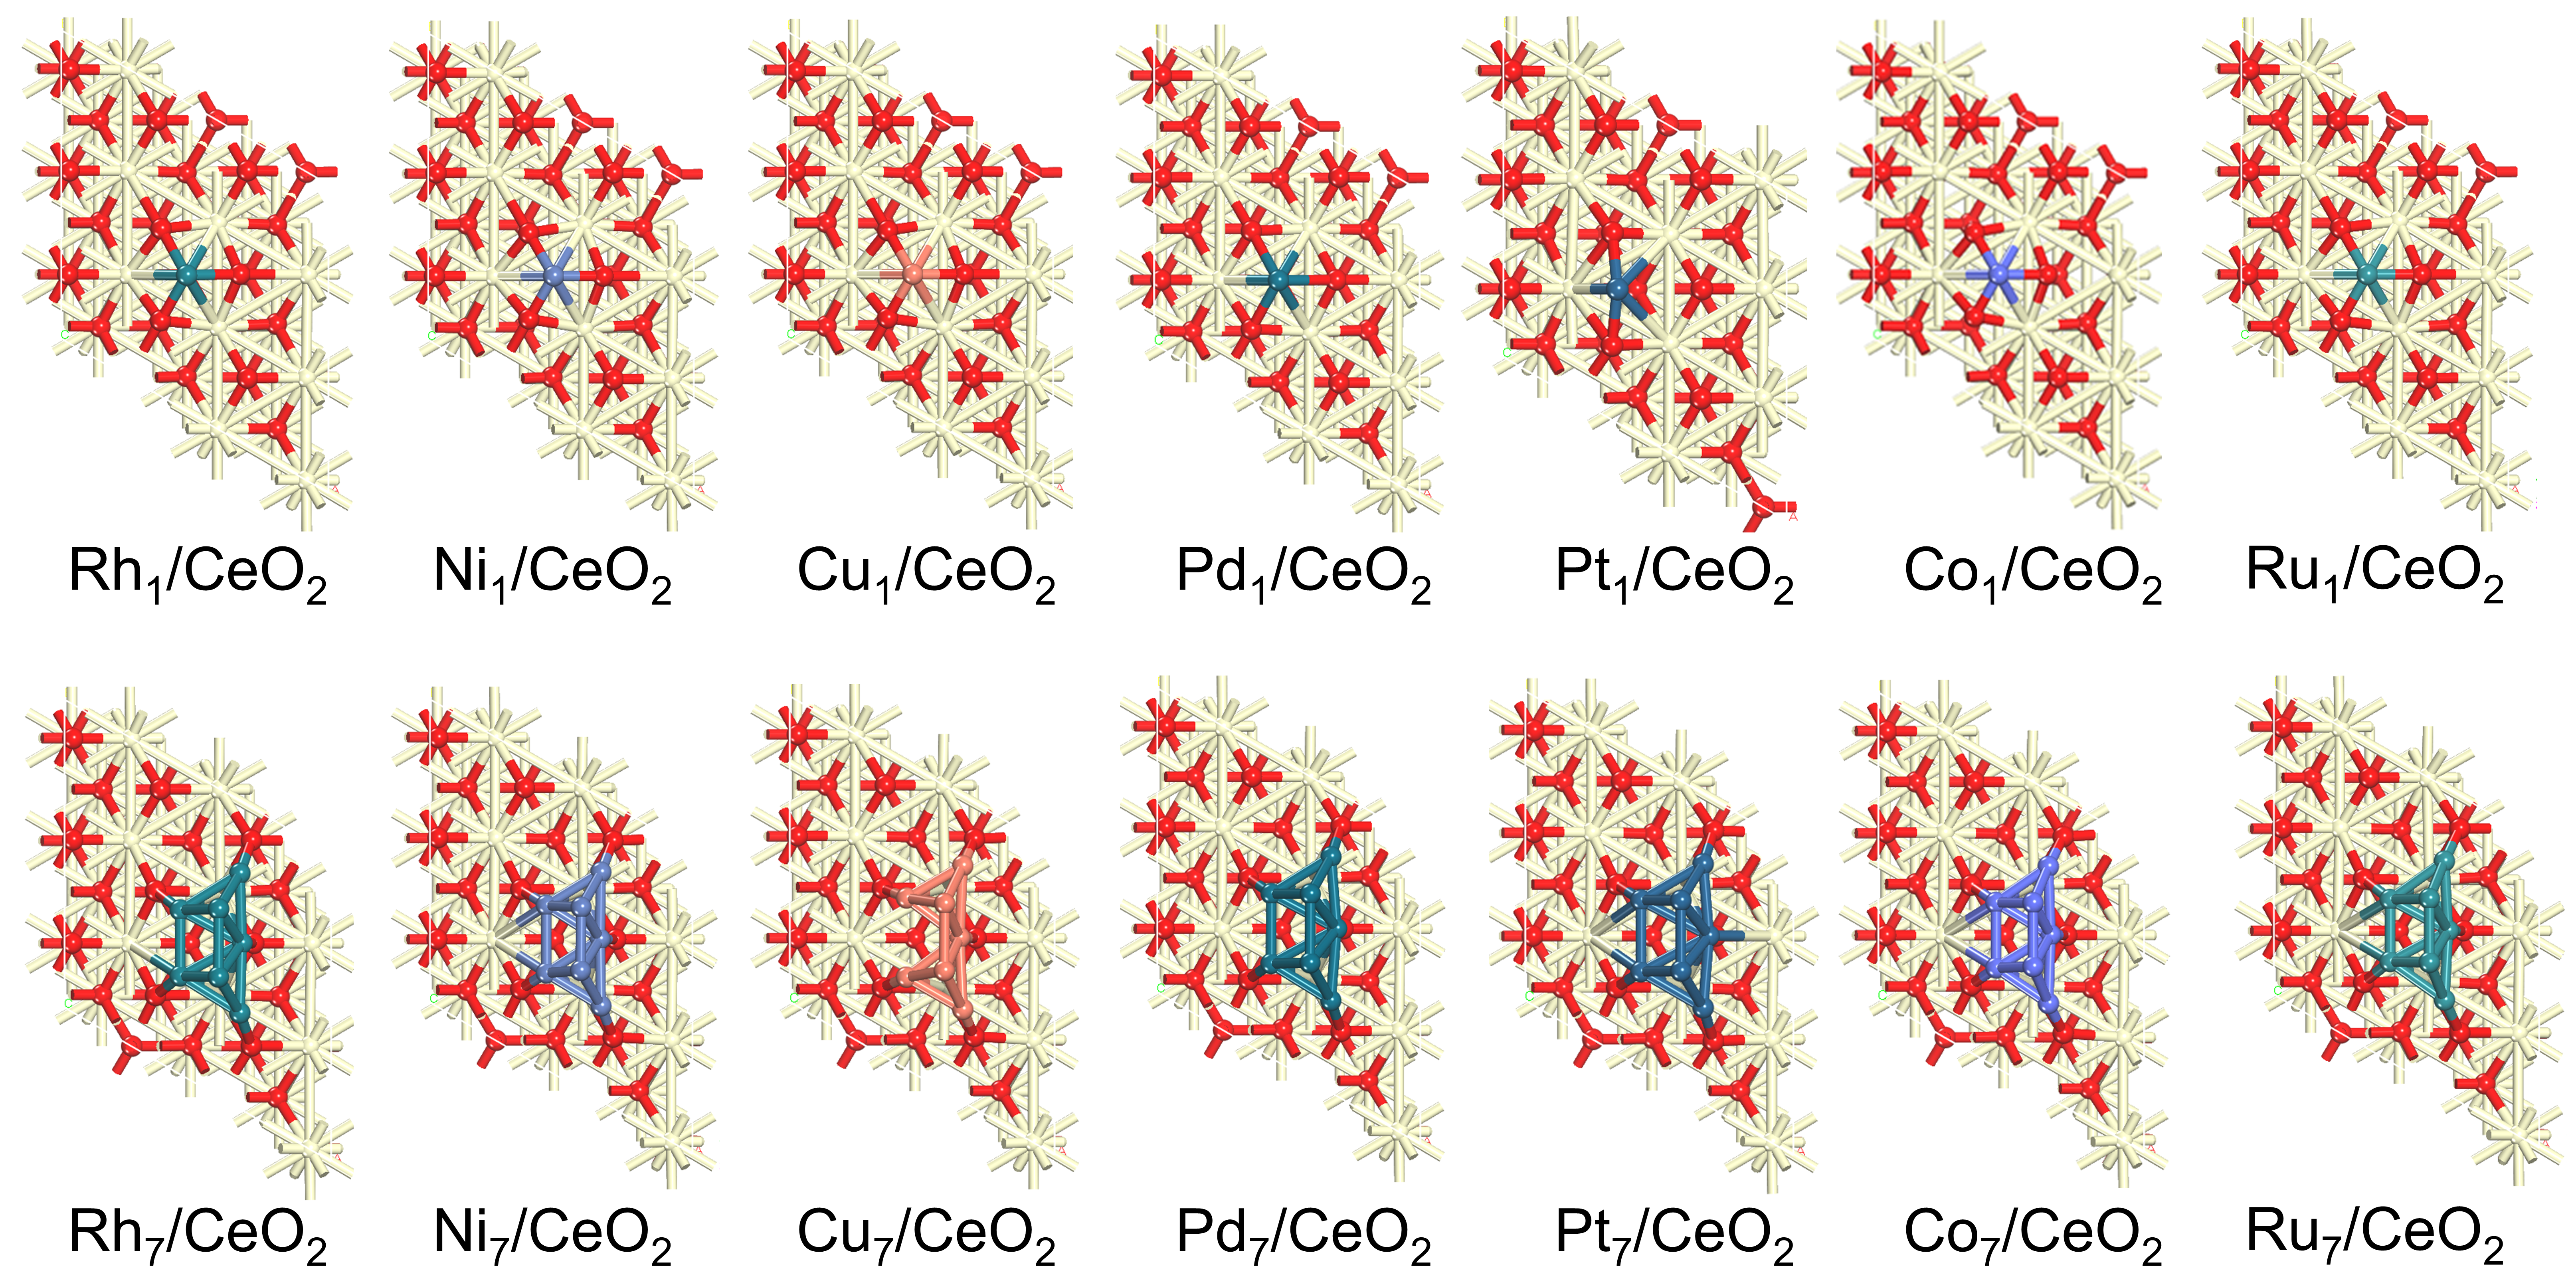


**Fig. S20.** The configurations of M1/CeO2 and M7/CeO2 (M = Rh, Ni, Cu, Pd, Pt, Co, Ru). Yellow spheres represent Ce, red spheres represent O, teal spheres represent Rh, slateblue spheres represent Ni, orange spheres represent Cu, dark slategrey spheres represent Pd, dark blue spheres represent Pt, medium slateblue spheres represent Co, dark cyan spheres represent Ru.


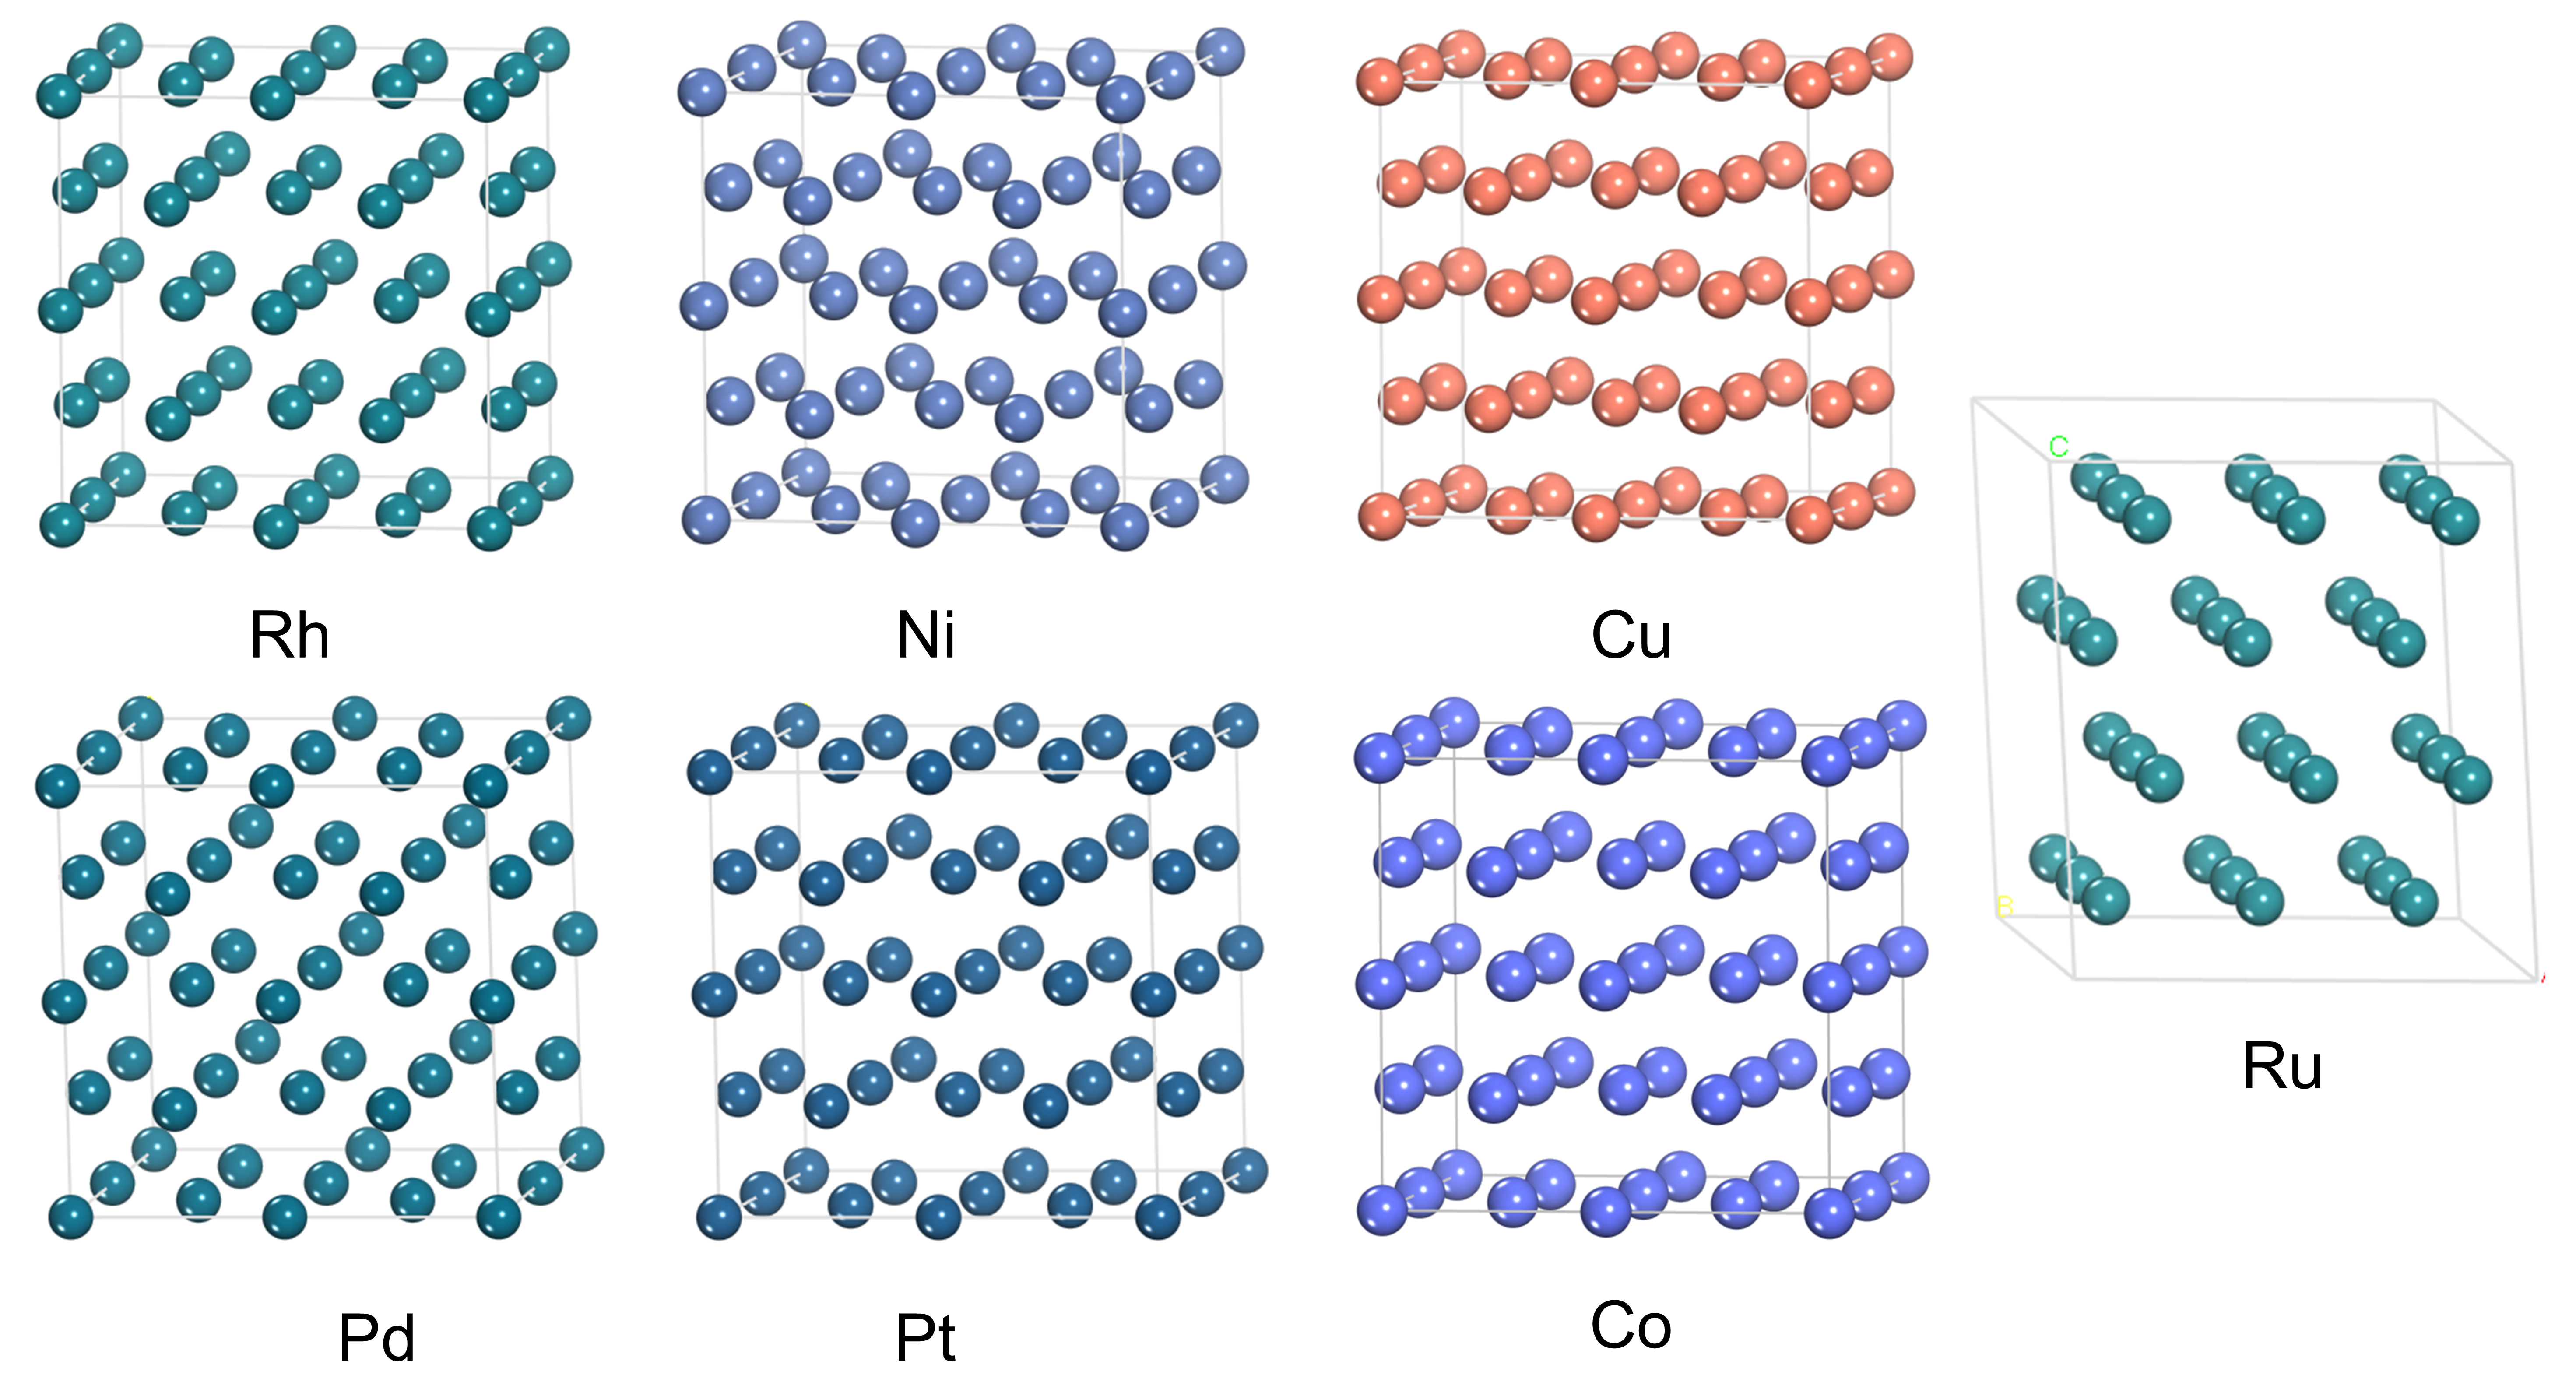


**Fig. S21.** The crystal configurations of Rh, Ni, Cu, Pd, Pt, Co and Ru metals. Teal spheres represent Rh, slateblue spheres represent Ni, orange spheres represent Cu, dark slategrey spheres represent Pd, dark blue spheres represent Pt, medium slateblue spheres represent Co, dark cyan spheres represent Ru.

**Table S7.** Electronic properties of metals with d-states' center (εd), electron numbers of d orbitals (de), bader charge (Q), and coordination number (CN) of the metal in different models.

| Catalysts | Metal | εd,p  (eV) | εd,m  (eV) | de,p  (|e|) | de,avg,m  (|e|) | de,sum,m  (|e|) | Qp  (|e|) | Qavg,m  (|e|) | Qsum,m  (|e|) | CNp | CNm |
| --- | --- | --- | --- | --- | --- | --- | --- | --- | --- | --- | --- |
| Al2O3 supported single atom | Rh | -1.73 | -2.04 | 8 | 0.823 | 0.823 | 0 | -0.16 | -0.16 | 12 | 4 |
| Ni | -1.29 | -0.40 | 8 | 9.362 | 9.362 | 0 | -0.25 | -0.25 | 12 | 5 |
| Cu | -2.67 | -3.22 | 10 | 1.265 | 1.265 | 0 | -0.54 | -0.54 | 12 | 5 |
| Pd | -1.83 | -0.56 | 10 | 2.535 | 2.536 | 0 | -0.07 | -0.07 | 12 | 3 |
| Pt | -2.25 | -1.52 | 9 | 2.153 | 2.153 | 0 | 0.14 | 0.14 | 12 | 2 |
| Co | -1.17 | -0.86 | 7 | 2.574 | 2.574 | 0 | -0.47 | -0.47 | 12 | 5 |
| Ru | -1.41 | -0.47 | 7 | 5.878 | 5.878 | 0 | -0.28 | -0.28 | 12 | 5 |
| Al2O3 supported cluster | Rh | -1.73 | -0.61 | 8 | 4.922 | 34.454 | 0 | -0.019 | -0.13 | 12 | 5.43 |
| Ni | -1.29 | -0.90 | 8 | 4.544 | 31.811 | 0 | -0.066 | -0.46 | 12 | 5.43 |
| Cu | -2.67 | -2.52 | 10 | 4.935 | 34.545 | 0 | -0.082 | -0.57 | 12 | 5.29 |
| Pd | -1.83 | -1.63 | 10 | 5.289 | 37.022 | 0 | -0.010 | -0.07 | 12 | 5.29 |
| Pt | -2.25 | -1.82 | 9 | 7.434 | 52.039 | 0 | 0.019 | 0.13 | 12 | 4.14 |
| Co | -1.17 | -0.63 | 7 | 4.756 | 33.294 | 0 | -0.088 | -0.62 | 12 | 5.43 |
| Ru | -1.41 | -1.73 | 7 | 3.997 | 27.981 | 0 | -0.051 | -0.36 | 12 | 4.71 |
| CeO2 supported single atom | Rh | -1.73 | -1.91 | 8 | 2.389 | 2.389 | 0 | -0.48 | -0.48 | 12 | 6 |
| Ni | -1.29 | -0.74 | 8 | 2.669 | 2.669 | 0 | -0.67 | -0.67 | 12 | 6 |
| Cu | -2.67 | -29.62 | 10 | 0.946 | 0.946 | 0 | -1.40 | -1.40 | 12 | 6 |
| Pd | -1.83 | -3.30 | 10 | 1.316 | 1.316 | 0 | -0.22 | -0.22 | 12 | 6 |
| Pt | -2.25 | -4.06 | 9 | 3.064 | 3.064 | 0 | -0.29 | -0.29 | 12 | 5 |
| Co | -1.17 | -1.61 | 7 | 2.579 | 2.579 | 0 | -0.79 | -0.79 | 12 | 6 |
| Ru | -1.41 | -2.83 | 7 | 1.257 | 1.257 | 0 | -0.75 | -0.75 | 12 | 6 |
| CeO2 supported cluster | Rh | -1.73 | -1.76 | 8 | 5.922 | 41.453 | 0 | -0.085 | -0.60 | 12 | 4.71 |
| Ni | -1.29 | -1.49 | 8 | 2.301 | 16.109 | 0 | -0.133 | -0.93 | 12 | 5 |
| Cu | -2.67 | -3.02 | 10 | 5.342 | 37.392 | 0 | -0.208 | -1.46 | 12 | 4.71 |
| Pd | -1.83 | -2.34 | 10 | 2.251 | 15.756 | 0 | -0.042 | -0.29 | 12 | 4.43 |
| Pt | -2.25 | -3.24 | 9 | 9.032 | 63.222 | 0 | -0.023 | -0.16 | 12 | 4.71 |
| Co | -1.17 | -1.20 | 7 | 9.166 | 64.164 | 0 | -0.163 | -1.14 | 12 | 4.71 |
| Ru | -1.41 | -3.65 | 7 | 3.131 | 21.914 | 0 | -0.143 | -1.00 | 12 | 4.71 |
| Al2O3 or CeO2 supported particle | Rh | -1.73 | -2.29 | 8 | 5.536 | 177.153 | 0 | 0 | 0 | 12 | 12 |
| Ni | -1.29 | -1.32 | 8 | 6.305 | 201.751 | 0 | 0 | 0 | 12 | 12 |
| Cu | -2.67 | -2.20 | 10 | 7.201 | 230.426 | 0 | 0 | 0 | 12 | 12 |
| Pd | -1.83 | -1.98 | 10 | 6.055 | 193.750 | 0 | 0 | 0 | 12 | 12 |
| Pt | -2.25 | -2.63 | 9 | 5.721 | 183.058 | 0 | 0 | 0 | 12 | 12 |
| Co | -1.17 | -1.48 | 7 | 5.181 | 165.777 | 0 | 0 | 0 | 12 | 12 |
| Ru | -1.41 | -2.42 | 7 | 5.273 | 189.812 | 0 | 0 | 0 | 12 | 12 |

εd,p: d-states' center of pristine metal atom25.

εd,m: d-states' center of metal atom in the model.

de,p: The electron numbers of d orbital of pristine metal atom.

de,avg,m: The average electron numbers of d orbital of metal atom in the model.

de,sum,m: The sum electron numbers of d orbital of metal atom in the model.

Qp: Bader charge transfer of pristine metal atom.

Qavg,m: Average bader charge, charge transfer of metal atom in the model.

Qsum,m: Sum of bader charge, charge transfer of metal atom in the model.

CNp: Coordination number of metal atom in the crystal model.

CNm: Coordination number of metal atom in the model.

**
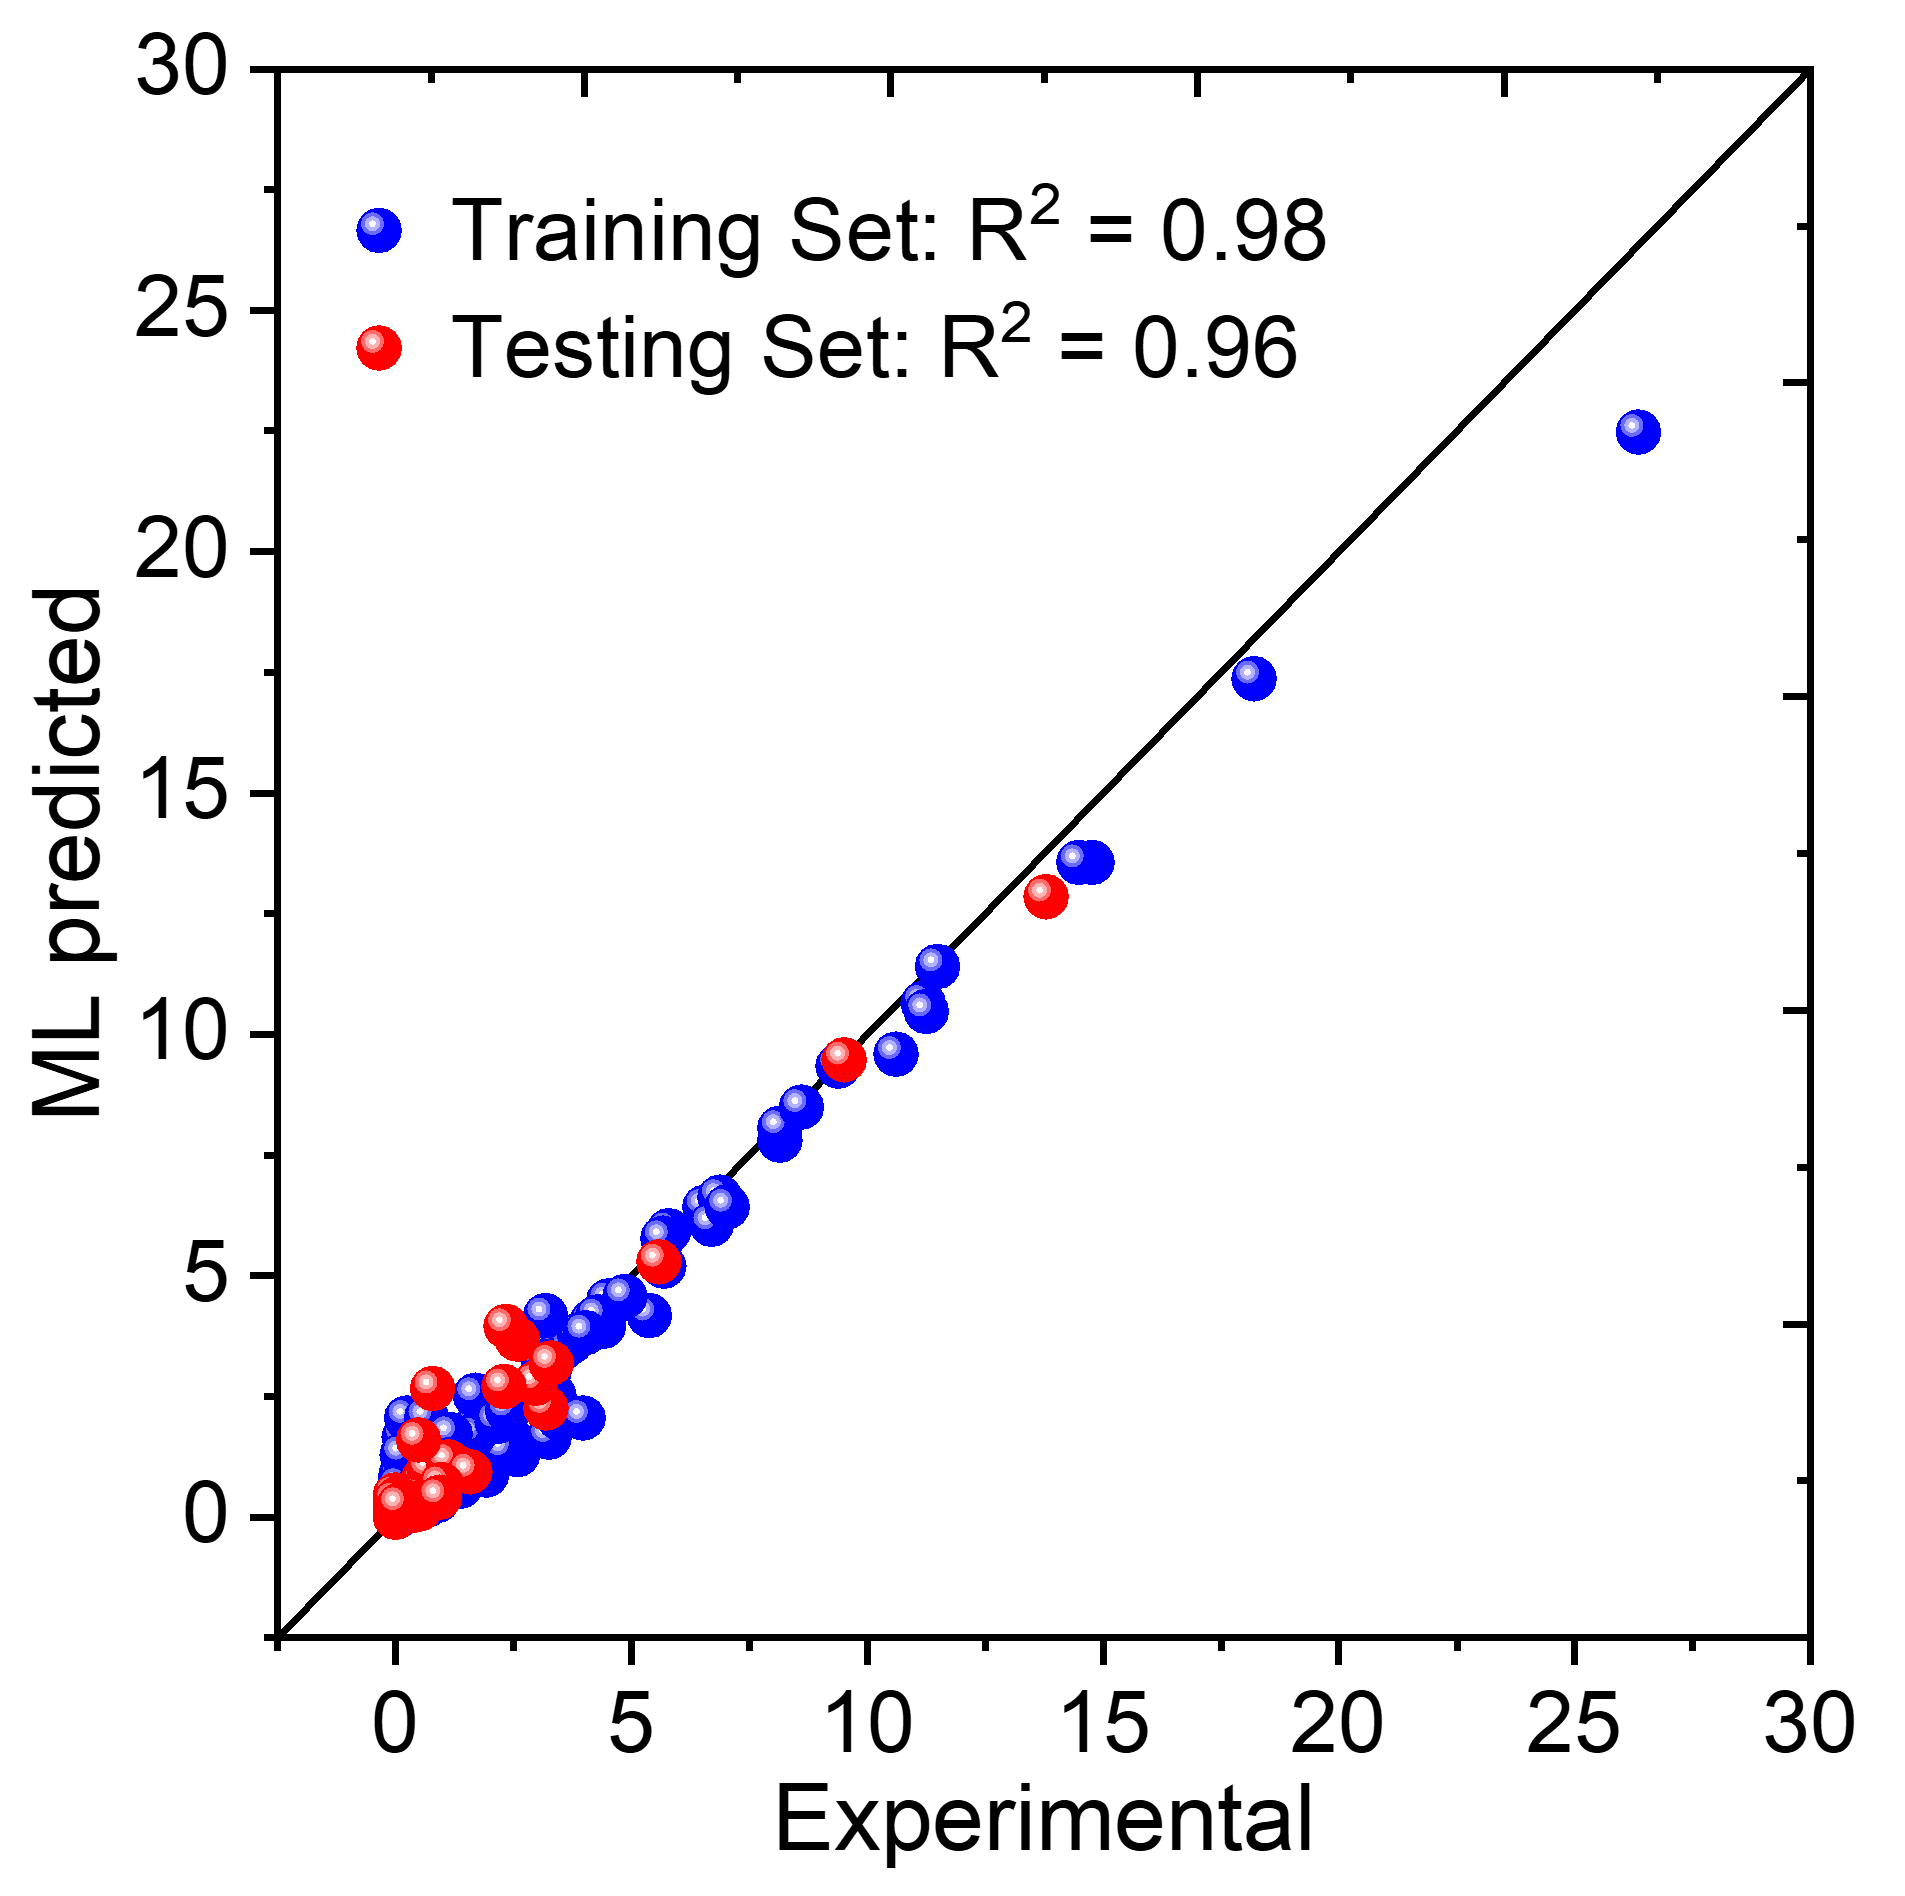
**

**Fig. S22.** Scatter plots of the training sets and testing sets showing the performance of the machine learning model used for establishing the correlation between catalyst performance and the intrinsic electronic and structural properties of the catalysts

**D. Supporting References**

1. Perdew, J. P., Burke, K. & Ernzerhof, M. Generalized gradient approximation made simple. *Phys. Rev. Lett.* **77**, 3865-3868 (1996).
2. Kresse, G. & Furthmuller, J. Efficiency of ab-initio total energy calculation for metals and semiconductors using a plan-wave basis set. *Comput. Mater. Sci.* **6**, 15-50 (1996).
3. Kresse, G. & Furthmuller, J. Efficient iterative schemes for ab initio total-energy calculations using a plane-wave basis set. *Phys. Rev. B* **54**, 11169-11186 (1996).
4. Kresse, G. & Hafner, J. Ab initio molecular-dynamics simulation of the liquid-metal-amorphous-semiconductor transition in germanium. *Phys. Rev. B* **49**, 14251 (1994).
5. Dudarev, S. L., Botton, G. A., Savrasov, S. Y., Humphreys, C. J. & Sutton, A. P. Electron-energy-loss spectra and the structural stability of nickel oxide: an LSDA+U study. *Phys. Rev. B* **57**, 1505-1509 (1998).
6. Blöchl, P. E. Projector augmented wave-method. *Phys. Rev. B* **50**, 17953-17979 (1994).
7. Kresse, G. & Joubert, D. From ultrasoft pseudopotentials to the projector augmented-wave method. *Phys. Rev. B* **59**, 1758-1775 (1999).
8. Bengone, O., Alouani, M., Blöchl, P. & Hugel, J. Implementation of the projector augmented-wave LDA+U method: Application to the electronic structure of NiO. *Phys. Rev. B* **62**, 16392-16401 (2000).
9. Fabris, S., de Gironcoli, S., Baroni, S., Vicario, G. & Balducci, G. Reply to “Comment on ‘taming multiple valency with density functionals: a case study of defective ceria’. *Phys. Rev. B* **72**, 237102 (2005).
10. Cococcioni, M. & de Gironcoli, S. Linear response approach to the calculation of the effective interaction parameters in LDA+U method. *Phys. Rev. B* **71**, 035105 (2005).
11. Castleton, C. W., Kullgren, J. & Hermansson, K. Tuning LDA+U for electron localization and structure at oxygen vacancies in ceria. *J. Chem. Phys.* **127**, 244704 (2007).
12. Fu, X.-P. et al. Boosting reactivity of water-gas shift reaction by synergistic function over CeO2-x/CoO1-x/Co dual interfacial structures. *Nat. Commun.***14**, 6851 (2023).
13. Yang, S. et al. Photocatalytic Co-reduction of N2 and CO2 with CeO2 catalyst for urea synthesis. *Angew. Chem. Int. Ed.* **62**, e202312076 (2023).
14. Monkhorst, H. J. & Pack, J. D. Special points for Brillouin-zone integrations. *Phys. Rev. B* **13**, 5188-5192 (1976).
15. Henkelman, G. & Jónsson, H. Improved tangent estimate in the nudged elastic band method for finding minimum energy paths and saddle points*. J. Chem. Phys.* **113**, 9978-9985 (2000).
16. Henkelman, G., Uberuaga, B. P. & Jónsson, H. Climbing image nudged elastic band method for finding saddle points and minimum energy paths. *J. Chem. Phys.***113**, 9901-9904 (2000).
17. Liu, B., Zhao, Z., Henkelman, G. & Song, W. Computational design of a CeO2-supported Pd-based bimetallic nanorod for CO oxidation. *J. Phys. Chem. C* **120**, 5557-5564 (2016).
18. Zhang, Z. et al. The most active Cu facet for low-temperature water gas shift reaction. *Nat. Commun.* **8**, 488 (2017).
19. Liao, W. et al. Decoupling the interfacial catalysis of CeO2‑supported Rh catalysts tuned by CeO2 morphology and Rh particle size in CO2 Hydrogenation. *ACS Catal.* **13**, 5767-5779 (2023).
20. Hao, Z. et al. Decoupling the effect of Ni particle size and surface oxygen deficiencies in CO2 methanation over ceria supported Ni. *Appl. Catal. B: Environ.* **286**, 119922 (2021).
21. Zhang, Z. et al. Support-dependent rate-determining step of CO2 hydrogenation to formic acid on metal oxide supported Pd catalysts. *J. Catal.* **376**, 57-67 (2019).
22. Fan, L. et al. Ceria morphology-dependent Pd-CeO2 interaction and catalysis in CO2 hydrogenation into formate. *J. Catal.* **397**, 116-127 (2021).
23. Liao, W. et al. Tuning activity and selectivity of CO2 Hydrogenation via metal-oxide interfaces over ZnO-supported metal catalysts. *J. Catal.* **407**, 126-140 (2022).
24. Nørskov, [J. K.](https://www.wiley.com/en-cn/search?filters%5bauthor%5d=Jens%20K.%20N%C3%B8rskov&pq=++), Studt, F., Abild-Pedersen, F. & Bligaard, T. Fundamental concepts in heterogeneous catalysis. *Angew. Chem. Int. Ed.* **54**, 10404-10405 (2015).
