# Supplementary material for: Machine learning assisted interfacial catalysis of metal-oxide nanocatalysts in CO2 hydrogenation
Source: Research Square preprint supplement (doi:10.21203/rs.3.rs-5884355/v1), 2025-02-05
Supplement: Supplementary file 2 [file bcededf290673c3ae9dc0abd.xlsx]

## Sheet: Sheet1
Rh	Ni	Cu	Pd	Pt	Co	Ru	CeO2	Al2O3	Metal loadings / wt.%	Temperature / oC	CO2 conversion / %	CH4 selectivity / %	CO selectivity / %	Mass of catalyst (g)	Total flow rate (mL/min)	CO2 contents (%)	YeildCO (molCO·gmetal-1·h-1)
0	0	0	0	1	0	0	1	0	0.1	350	12.3925	0.74872	99.2513	0.05	30	0.1333	26.35
0	0	0	0	1	0	0	1	0	0.1	330	8.5383	0.49421	99.5058	0.05	30	0.1333	18.2014
0	0	0	0	0	0	1	1	0	0.1	350	7.37414	6.53099	93.469	0.05	30	0.1333	14.766
1	0	0	0	0	0	0	1	0	0.1	350	10.9698	38.3714	61.6286	0.05	30	0.1333	14.4832
0	0	0	1	0	0	0	1	0	0.1	350	6.53072	1.43186	98.5681	0.05	30	0.1333	13.7906
0	0	0	0	1	0	0	1	0	0.1	310	5.38213	0.31708	99.6829	0.05	30	0.1333	11.4937
0	0	0	0	1	0	0	0	1	0.1	350	5.32982	1.42783	98.5722	0.05	30	0.1333	11.2552
0	0	0	1	0	0	0	1	0	0.1	330	5.28742	1.26387	98.7361	0.05	30	0.1333	11.1842
0	0	0	0	1	0	0	1	0	0.5	350	25.6968	3.66415	96.3358	0.05	30	0.1333	10.6067
1	0	0	0	0	0	0	1	0	0.1	330	7.96731	44.2703	55.7297	0.05	30	0.1333	9.51224
0	0	0	0	0	0	1	1	0	0.1	330	5.43172	19.3813	80.6187	0.05	30	0.1333	9.38118
0	0	0	0	1	0	0	1	0	0.5	330	20.6018	2.49252	97.5075	0.05	30	0.1333	8.6071
0	0	0	0	1	0	0	0	1	0.1	330	3.8501	1.18151	98.8185	0.05	30	0.1333	8.1507
0	0	0	1	0	0	0	1	0	0.1	310	3.83785	0.89039	99.1096	0.05	30	0.1333	8.1487
0	0	0	0	1	0	0	1	0	0.1	290	3.28796	0.2073	99.7927	0.05	30	0.1333	7.02927
0	0	0	1	0	0	0	1	0	0.5	350	16.8837	4.91549	95.0845	0.05	30	0.1333	6.87848
1	0	0	0	0	0	0	1	0	0.1	310	5.26415	40.5714	59.4286	0.05	30	0.1333	6.70206
0	0	0	0	1	0	0	1	0	0.5	310	15.5417	1.55272	98.4473	0.05	30	0.1333	6.55565
0	0	0	1	0	0	0	1	0	0.1	290	2.71842	0.53631	99.4637	0.05	30	0.1333	5.7925
0	0	0	0	0	0	1	1	0	0.1	310	3.78964	29.9853	70.0147	0.05	30	0.1333	5.68423
0	0	0	0	1	0	0	0	1	0.1	310	2.67226	1.04058	98.9594	0.05	30	0.1333	5.66527
0	0	0	1	0	0	0	1	0	0.5	330	13.1903	1.26387	98.7361	0.05	30	0.1333	5.58013
0	0	0	0	1	0	0	1	0	1	350	26.6462	5.70673	94.2933	0.05	30	0.1333	5.38271
1	0	0	0	0	0	0	1	0	0.1	290	3.33025	31.8343	68.1657	0.05	30	0.1333	4.86326
0	0	0	0	1	0	0	1	0	0.5	290	10.6413	0.90933	99.0907	0.05	30	0.1333	4.51796
0	0	0	0	1	0	0	1	0	1	330	21.3104	3.47941	96.5206	0.05	30	0.1333	4.40653
0	0	0	1	0	0	0	1	0	0.5	310	10.0992	0.89039	99.1096	0.05	30	0.1333	4.28862
0	0	0	0	1	0	0	1	0	0.1	270	1.94295	0.13124	99.8688	0.05	30	0.1333	4.15696
0	0	0	0	1	0	0	0	1	0.1	290	1.8955	0.88593	99.1141	0.05	30	0.1333	4.02479
0	0	0	1	0	0	0	1	0	1	350	20.1212	7.86469	92.1353	0.05	30	0.1333	3.97159
0	0	0	1	0	0	0	1	0	0.1	270	1.82681	0.30585	99.6941	0.05	30	0.1333	3.90164
0	0	1	0	0	0	0	1	0	0.5	350	8.68028	0	100	0.05	30	0.1333	3.71919
1	0	0	0	0	0	0	1	0	0.1	270	2.13825	22.8606	77.1394	0.05	30	0.1333	3.53362
0	0	1	0	0	0	0	1	0	1	350	16.1846	0.00142	99.9986	0.05	30	0.1333	3.46722
0	0	0	0	1	0	0	1	0	1	310	16.0094	2.11421	97.8858	0.05	30	0.1333	3.35722
0	0	0	1	0	0	0	0	1	0.1	350	1.63096	5.60756	94.3924	0.05	30	0.1333	3.29811
0	0	0	1	0	0	0	1	0	1	330	16.0356	5.13949	94.8605	0.05	30	0.1333	3.25879
0	0	0	1	0	0	0	1	0	0.5	290	7.48373	0.53631	99.4637	0.05	30	0.1333	3.18931
0	0	0	0	1	0	0	0	1	1	350	15.2969	2.99915	97.0008	0.05	30	0.1333	3.1788
0	0	0	0	0	0	1	1	0	0.1	290	2.21703	34.1672	65.8328	0.05	30	0.1333	3.12679
0	0	0	0	1	0	0	1	0	0.5	270	6.97073	0.5213	99.4787	0.05	30	0.1333	2.97114
0	0	0	1	0	0	0	1	0	1	310	12.4185	2.91489	97.0851	0.05	30	0.1333	2.58289
0	0	0	0	1	0	0	0	1	0.1	270	1.21148	0.76589	99.2341	0.05	30	0.1333	2.5755
0	0	0	1	0	0	0	0	1	0.1	330	1.24373	4.14086	95.8591	0.05	30	0.1333	2.55414
0	0	0	1	0	0	0	1	0	0.1	250	1.15534	0.13134	99.8687	0.05	30	0.1333	2.47186
0	0	0	0	1	0	0	1	0	0.1	250	1.12966	0.04357	99.9564	0.05	30	0.1333	2.41904
0	0	0	0	1	0	0	1	0	1	290	11.2245	1.27043	98.7296	0.05	30	0.1333	2.3741
0	0	0	0	1	0	0	0	1	1	330	11.1967	2.28709	97.7129	0.05	30	0.1333	2.34383
0	0	1	0	0	0	0	1	0	1	330	10.7159	0.00208	99.9979	0.05	30	0.1333	2.29563
0	0	1	0	0	0	0	1	0	0.5	330	5.35655	0	100	0.05	30	0.1333	2.29509
1	0	0	0	0	0	0	1	0	0.1	250	1.20791	16.7616	83.2384	0.05	30	0.1333	2.15399
0	0	0	1	0	0	0	1	0	0.5	270	5.00544	0.30585	99.6941	0.05	30	0.1333	2.13809
0	0	0	1	0	0	0	1	0	1	290	9.14707	1.51837	98.4816	0.05	30	0.1333	1.92984
0	0	0	0	1	0	0	1	0	0.5	250	4.28471	0.28021	99.7198	0.05	30	0.1333	1.8307
0	0	0	0	0	0	1	1	0	0.1	270	1.23901	34.1691	65.8309	0.05	30	0.1333	1.74739
0	0	0	0	1	0	0	0	1	1	310	8.02348	1.90473	98.0953	0.05	30	0.1333	1.68615
0	0	0	1	0	0	0	0	1	0.1	310	0.79844	3.22152	96.7785	0.05	30	0.1333	1.65541
0	0	0	0	1	0	0	1	0	1	270	7.39726	0.75166	99.2483	0.05	30	0.1333	1.57282
0	0	0	0	1	0	0	0	1	0.1	250	0.72191	0.64252	99.3575	0.05	30	0.1333	1.53663
0	0	1	0	0	0	0	1	0	0.5	310	3.31679	0	100	0.05	30	0.1333	1.42113
0	0	0	1	0	0	0	1	0	1	270	6.46563	0.78111	99.2189	0.05	30	0.1333	1.37433
0	0	0	1	0	0	0	1	0	0.5	250	3.15309	0.13134	99.8687	0.05	30	0.1333	1.34921
0	0	1	0	0	0	0	1	0	1	310	6.29481	0.00321	99.9968	0.05	30	0.1333	1.34851
1	0	0	0	0	0	0	1	0	0.1	230	0.69929	10.5381	89.4619	0.05	30	0.1333	1.34023
0	1	0	0	0	0	0	1	0	0.5	350	31.0382	90.3	9.70004	0.05	30	0.1333	1.28998
0	0	0	0	1	0	0	1	0	0.1	230	0.57594	0	100	0.05	30	0.1333	1.23385
0	0	0	1	0	0	0	0	1	0.1	290	0.55635	2.20065	97.7994	0.05	30	0.1333	1.16565
0	0	0	0	1	0	0	0	1	1	290	5.49656	1.72559	98.2744	0.05	30	0.1333	1.15722
0	0	0	0	0	0	1	1	0	0.5	350	37.3944	92.8058	7.19417	0.05	30	0.1333	1.15266
0	0	0	1	0	0	0	1	0	0.1	230	0.53303	0	100	0.05	30	0.1333	1.14192
0	1	0	0	0	0	0	1	0	0.5	330	21.5245	87.6871	12.3129	0.05	30	0.1333	1.13555
0	0	0	0	1	0	0	1	0	0.5	230	2.50355	0.14564	99.8544	0.05	30	0.1333	1.07112
0	0	0	0	1	0	0	0	1	0.1	230	0.47837	0.40073	99.5993	0.05	30	0.1333	1.02072
0	0	0	0	0	0	1	1	0	0.5	330	24.6839	90.5462	9.45384	0.05	30	0.1333	0.999855
0	0	0	0	0	0	1	1	0	0.1	250	0.65054	30.5871	69.4129	0.05	30	0.1333	0.967384
0	1	0	0	0	0	0	1	0	0.1	350	0.44324	0.26091	99.7391	0.05	30	0.1333	0.947085
0	0	0	0	1	0	0	1	0	1	250	4.36143	0.46544	99.5346	0.05	30	0.1333	0.93001
0	0	0	1	0	0	0	1	0	1	250	4.1442	0.40528	99.5947	0.05	30	0.1333	0.884223
0	1	0	0	0	0	0	1	0	0.5	310	12.7609	84.6895	15.3105	0.05	30	0.1333	0.837115
0	0	0	1	0	0	0	1	0	0.5	230	1.83757	0	100	0.05	30	0.1333	0.787333
0	0	0	0	1	0	0	0	1	1	270	3.73202	1.65425	98.3457	0.05	30	0.1333	0.786293
0	0	0	1	0	0	0	1	0	0.1	210	0.36109	0	100	0.05	30	0.1333	0.773571
0	0	1	0	0	0	0	1	0	0.1	350	0.35009	0.13373	99.8663	0.05	30	0.1333	0.749002
0	0	0	1	0	0	0	0	1	0.1	270	0.35427	1.36905	98.6309	0.05	30	0.1333	0.74857
0	0	1	0	0	0	0	1	0	0.5	290	1.71242	0	100	0.05	30	0.1333	0.733711
1	0	0	0	0	0	0	1	0	0.1	210	0.35638	6.9953	93.0047	0.05	30	0.1333	0.710073
0	0	0	0	0	0	1	1	0	0.5	310	12.5288	86.8209	13.1791	0.05	30	0.1333	0.707471
0	0	0	0	0	1	0	1	0	1	330	7.46098	55.7658	44.2342	0.05	30	0.1333	0.707031
0	0	1	0	0	0	0	0	1	1	350	3.05376	0.01816	99.9818	0.05	30	0.1333	0.654095
0	0	1	0	0	0	0	1	0	1	290	2.91841	0.00519	99.9948	0.05	30	0.1333	0.625185
0	1	0	0	0	0	0	1	0	0.1	330	0.29273	0.59287	99.4071	0.05	30	0.1333	0.623404
0	0	0	0	1	0	0	1	0	0.1	210	0.28721	0	100	0.05	30	0.1333	0.615296
0	0	0	0	1	0	0	1	0	0.5	210	1.41892	0.04796	99.952	0.05	30	0.1333	0.607665
0	0	0	0	0	1	0	1	0	0.5	350	1.46956	6.6187	93.3813	0.05	30	0.1333	0.587979
0	0	0	0	0	0	1	1	0	0.1	230	0.34929	22.3482	77.6518	0.05	30	0.1333	0.581062
0	0	0	0	0	1	0	1	0	0.5	310	1.5893	15.0017	84.9983	0.05	30	0.1333	0.578803
0	0	0	0	1	0	0	0	1	0.1	210	0.26453	0.165	99.835	0.05	30	0.1333	0.565773
0	1	0	0	0	0	0	0	1	1	350	3.56533	27.4025	72.5975	0.05	30	0.1333	0.554505
0	1	0	0	0	0	0	1	0	0.5	290	7.06171	81.9466	18.0534	0.05	30	0.1333	0.546239
0	0	0	0	1	0	0	1	0	1	230	2.48812	0.29474	99.7053	0.05	30	0.1333	0.531464
0	0	0	1	0	0	0	1	0	1	230	2.47591	0.24278	99.7572	0.05	30	0.1333	0.529132
0	0	0	0	0	1	0	1	0	0.5	290	1.79278	31.8014	68.1986	0.05	30	0.1333	0.523862
0	0	0	0	0	1	0	1	0	1	310	6.95832	65.3717	34.6283	0.05	30	0.1333	0.516202
0	0	0	0	1	0	0	0	1	1	250	2.31636	1.73254	98.2675	0.05	30	0.1333	0.487641
0	0	0	1	0	0	0	0	1	0.1	250	0.22471	0.57544	99.4246	0.05	30	0.1333	0.478631
0	0	0	0	0	0	1	1	0	0.5	290	6.20079	82.2201	17.7799	0.05	30	0.1333	0.472378
0	0	0	0	0	1	0	1	0	0.5	330	1.14895	6.73827	93.2617	0.05	30	0.1333	0.459113
0	0	0	0	0	0	1	1	0	1	350	32.8815	93.5722	6.42784	0.05	30	0.1333	0.452795
0	0	0	0	0	1	0	1	0	0.1	350	0.20596	0	100	0.05	30	0.1333	0.441233
0	0	0	1	0	0	0	1	0	0.5	210	1.01679	0	100	0.05	30	0.1333	0.435658
0	1	0	0	0	0	0	1	0	0.1	310	0.20338	0.68306	99.3169	0.05	30	0.1333	0.432729
0	0	0	0	0	1	0	1	0	1	350	2.34822	14.3108	85.6892	0.05	30	0.1333	0.431072
0	0	1	0	0	0	0	1	0	0.1	330	0.20026	0.12948	99.8705	0.05	30	0.1333	0.428466
0	0	1	0	0	0	0	0	1	1	330	1.95971	0.03361	99.9664	0.05	30	0.1333	0.419692
0	0	0	0	0	1	0	1	0	1	290	5.50668	65.2791	34.7209	0.05	30	0.1333	0.409605
0	1	0	0	0	0	0	1	0	0.5	270	3.80602	77.5265	22.4735	0.05	30	0.1333	0.366485
0	0	1	0	0	0	0	1	0	1	270	1.70693	0.00718	99.9928	0.05	30	0.1333	0.365653
0	0	0	0	0	1	0	1	0	0.5	270	1.2788	35.5759	64.4241	0.05	30	0.1333	0.352993
0	0	1	0	0	0	0	1	0	0.5	270	0.81482	0	100	0.05	30	0.1333	0.349121
0	1	0	0	0	0	0	0	1	1	330	2.03251	24.0886	75.9114	0.05	30	0.1333	0.33054
0	1	0	0	0	0	0	1	0	1	350	45.4373	96.654	3.34598	0.05	30	0.1333	0.325702
0	0	0	0	0	0	1	0	1	0.1	350	0.20233	25.0429	74.9571	0.05	30	0.1333	0.324906
0	0	0	0	0	0	1	1	0	1	330	19.6776	92.4865	7.51354	0.05	30	0.1333	0.316739
0	0	0	0	0	0	1	1	0	0.5	270	2.93364	75.3632	24.6368	0.05	30	0.1333	0.309674
0	0	0	0	1	0	0	0	1	1	230	1.43287	1.75518	98.2448	0.05	30	0.1333	0.301579
0	0	0	1	0	0	0	0	1	0.1	230	0.13847	0	100	0.05	30	0.1333	0.296647
0	1	0	0	0	0	0	1	0	1	330	37.8788	96.3939	3.60614	0.05	30	0.1333	0.292633
0	0	0	0	1	0	0	1	0	1	210	1.36768	0.19164	99.8084	0.05	30	0.1333	0.29244
0	1	0	0	0	0	0	0	1	0.1	350	0.13644	0.47431	99.5257	0.05	30	0.1333	0.290912
0	0	0	0	0	0	1	1	0	0.1	210	0.16035	16.1816	83.8184	0.05	30	0.1333	0.287934
0	0	0	1	0	0	0	1	0	1	210	1.33283	0.15778	99.8422	0.05	30	0.1333	0.285085
1	0	0	0	0	0	0	1	0	0.5	350	47.7102	98.6528	1.34723	0.05	30	0.1333	0.275403
0	0	0	0	0	1	0	1	0	1	270	3.45331	63.2468	36.7532	0.05	30	0.1333	0.271904
0	1	0	0	0	0	0	1	0	1	310	26.0903	95.2822	4.71783	0.05	30	0.1333	0.263698
0	1	0	0	0	0	0	1	0	0.1	290	0.1203	1.13894	98.8611	0.05	30	0.1333	0.254786
0	0	1	0	0	0	0	0	1	1	310	1.15783	0.03892	99.9611	0.05	30	0.1333	0.247948
0	0	0	1	0	0	0	0	1	1	350	2.17975	49.2571	50.7429	0.05	30	0.1333	0.236956
0	1	0	0	0	0	0	1	0	0.5	250	2.01173	72.7204	27.2796	0.05	30	0.1333	0.235137
1	0	0	0	0	0	0	1	0	0.5	230	1.36326	61.3645	38.6355	0.05	30	0.1333	0.225673
1	0	0	0	0	0	0	1	0	0.5	330	38.2613	98.6431	1.35688	0.05	30	0.1333	0.222441
0	0	1	0	0	0	0	1	0	0.1	310	0.10173	0.12037	99.8796	0.05	30	0.1333	0.217676
1	0	0	0	0	0	0	1	0	0.5	250	2.66482	81.1544	18.8456	0.05	30	0.1333	0.215176
0	0	0	0	0	1	0	1	0	0.5	250	0.77156	36.7413	63.2587	0.05	30	0.1333	0.209124
1	0	0	0	0	0	0	1	0	0.5	270	6.06222	92.1009	7.89909	0.05	30	0.1333	0.205174
0	1	0	0	0	0	0	0	1	1	310	1.18353	19.7511	80.2489	0.05	30	0.1333	0.203471
1	0	0	0	0	0	0	0	1	0.1	250	0.38774	76.2334	23.7666	0.05	30	0.1333	0.197421
0	0	0	0	0	0	1	1	0	1	310	9.90344	90.7527	9.24727	0.05	30	0.1333	0.196193
0	0	0	0	0	0	1	0	1	0.1	330	0.14134	35.4113	64.5887	0.05	30	0.1333	0.195572
1	0	0	0	0	0	0	0	1	0.1	230	0.19519	53.8126	46.1874	0.05	30	0.1333	0.193137
0	0	0	0	0	0	1	1	0	0.5	250	1.32041	66.798	33.202	0.05	30	0.1333	0.18784
1	0	0	0	0	0	0	1	0	0.5	290	12.6625	96.5502	3.44985	0.05	30	0.1333	0.187169
0	0	0	1	0	0	0	0	1	1	330	1.51053	44.438	55.562	0.05	30	0.1333	0.179801
0	1	0	0	0	0	0	1	0	1	290	13.8289	93.9537	6.04631	0.05	30	0.1333	0.179128
0	0	0	0	1	0	0	0	1	1	210	0.83615	1.64251	98.3575	0.05	30	0.1333	0.176188
1	0	0	0	0	0	0	1	0	0.5	310	25.0476	98.3654	1.63459	0.05	30	0.1333	0.175424
0	0	1	0	0	0	0	1	0	1	250	0.79168	0.01365	99.9864	0.05	30	0.1333	0.16958
1	0	0	0	0	0	0	1	0	0.5	210	0.68954	45.6688	54.3312	0.05	30	0.1333	0.160518
0	0	1	0	0	0	0	1	0	0.5	250	0.37179	0	100	0.05	30	0.1333	0.159299
1	0	0	0	0	0	0	0	1	0.1	350	10.0605	99.2697	0.73032	0.05	30	0.1333	0.157404
0	0	0	0	0	1	0	1	0	1	250	1.92727	63.1348	36.8652	0.05	30	0.1333	0.15221
0	0	1	0	0	0	0	0	1	1	290	0.69372	0	100	0.05	30	0.1333	0.148617
0	1	0	0	0	0	0	1	0	0.5	230	1.00326	66.5294	33.4706	0.05	30	0.1333	0.143877
1	0	0	0	0	0	0	0	1	0.1	290	1.60604	95.8323	4.16775	0.05	30	0.1333	0.143398
0	0	0	1	0	0	0	0	1	1	310	1.06378	37.3918	62.6082	0.05	30	0.1333	0.142681
0	0	0	0	0	0	1	0	1	0.1	310	0.10679	37.7285	62.2715	0.05	30	0.1333	0.142464
0	0	0	0	0	1	0	1	0	0.5	230	0.47196	32.7831	67.2169	0.05	30	0.1333	0.135925
0	0	0	1	0	0	0	0	1	1	290	0.7438	29.684	70.316	0.05	30	0.1333	0.112046
0	1	0	0	0	0	0	1	0	1	270	6.58395	92.2295	7.77052	0.05	30	0.1333	0.109603
0	1	0	0	0	0	0	0	1	1	290	0.61441	16.8273	83.1727	0.05	30	0.1333	0.109477
0	0	0	0	0	0	1	1	0	0.5	230	0.57446	56.2153	43.7847	0.05	30	0.1333	0.10777
0	0	0	0	0	0	1	1	0	1	290	4.57869	90.3084	9.69158	0.05	30	0.1333	0.095065
0	1	0	0	0	0	0	1	0	0.5	210	0.4944	57.4417	42.5583	0.05	30	0.1333	0.0901523
0	0	0	1	0	0	0	0	1	1	270	0.49897	21.989	78.011	0.05	30	0.1333	0.0833902
0	0	0	0	0	1	0	0	1	1	350	0.37707	0	100	0.05	30	0.1333	0.0807805
0	0	0	0	0	1	0	1	0	0.5	210	0.25324	26.4839	73.5161	0.05	30	0.1333	0.0797682
0	0	0	0	0	1	0	1	0	1	230	0.97419	61.9163	38.0837	0.05	30	0.1333	0.0794817
0	0	1	0	0	0	0	0	1	1	270	0.33735	0	100	0.05	30	0.1333	0.0722712
0	1	0	0	0	0	0	1	0	1	250	3.15814	89.6658	10.3342	0.05	30	0.1333	0.0699186
1	0	0	0	0	0	0	0	1	0.1	270	0.70771	95.4063	4.59369	0.05	30	0.1333	0.0696469
0	0	1	0	0	0	0	1	0	1	230	0.32449	0.03775	99.9622	0.05	30	0.1333	0.0694899
0	0	0	0	0	0	1	1	0	0.5	210	0.27111	41.1878	58.8122	0.05	30	0.1333	0.0683168
0	0	1	0	0	0	0	1	0	0.5	230	0.15944	0	100	0.05	30	0.1333	0.0683143
0	1	0	0	0	0	0	0	1	1	270	0.33975	13.964	86.036	0.05	30	0.1333	0.0626217
0	0	0	0	0	0	1	0	1	1	350	2.04842	86.1104	13.8896	0.05	30	0.1333	0.0609526
0	0	0	0	0	0	1	1	0	1	270	2.1486	87.7635	12.2365	0.05	30	0.1333	0.0563246
0	0	0	0	0	1	0	0	1	1	330	0.23429	0	100	0.05	30	0.1333	0.0501924
1	0	0	0	0	0	0	0	1	0.1	330	6.15159	99.6227	0.3773	0.05	30	0.1333	0.0497232
0	1	0	0	0	0	0	1	0	1	230	1.49462	84.5039	15.4961	0.05	30	0.1333	0.0496179
1	0	0	0	0	0	0	0	1	0.1	310	3.29844	99.314	0.68596	0.05	30	0.1333	0.0484721
0	0	0	1	0	0	0	0	1	1	250	0.26582	19.2125	80.7875	0.05	30	0.1333	0.0460062
0	0	1	0	0	0	0	0	1	1	250	0.21277	0	100	0.05	30	0.1333	0.0455822
0	0	0	0	0	1	0	1	0	1	210	0.43766	61.3899	38.6101	0.05	30	0.1333	0.0362011
0	0	0	0	0	0	1	1	0	1	250	0.98276	83.3007	16.6993	0.05	30	0.1333	0.0351585
0	0	0	0	0	1	0	0	1	1	310	0.16388	0	100	0.05	30	0.1333	0.0351084
0	1	0	0	0	0	0	1	0	1	210	0.69267	77.3197	22.6803	0.05	30	0.1333	0.0336557
0	0	1	0	0	0	0	1	0	1	210	0.15687	0.08726	99.9127	0.05	30	0.1333	0.0335773
1	0	0	0	0	0	0	1	0	1	350	61.7035	99.764	0.23601	0.05	30	0.1333	0.0311979
0	1	0	0	0	0	0	0	1	1	250	0.16911	13.9566	86.0434	0.05	30	0.1333	0.0311725
0	0	0	0	0	1	0	0	1	1	290	0.13416	0	100	0.05	30	0.1333	0.0287414
0	1	0	0	0	0	0	0	1	1	230	0.14235	9.20106	90.7989	0.05	30	0.1333	0.02769
0	0	0	1	0	0	0	0	1	1	210	0.12495	5.76828	94.2317	0.05	30	0.1333	0.0252242
0	0	0	1	0	0	0	0	1	1	230	0.12264	16.9014	83.0986	0.05	30	0.1333	0.0218328
0	0	0	0	0	0	1	0	1	1	330	0.88551	89.5116	10.4884	0.05	30	0.1333	0.019897
0	0	0	0	0	0	1	1	0	1	230	0.42536	79.1307	20.8693	0.05	30	0.1333	0.0190173
1	0	0	0	0	0	0	1	0	1	330	54.5098	99.8667	0.13325	0.05	30	0.1333	0.0155606
0	0	0	0	0	0	1	1	0	1	210	0.21211	69.4663	30.5337	0.05	30	0.1333	0.0138747
1	0	0	0	0	0	0	1	0	1	250	4.73017	98.9775	1.0225	0.05	30	0.1333	0.0103615
1	0	0	0	0	0	0	1	0	1	290	28.0306	99.8597	0.14035	0.05	30	0.1333	0.0084281
1	0	0	0	0	0	0	1	0	1	230	1.73923	98.0146	1.9854	0.05	30	0.1333	0.00739758
1	0	0	0	0	0	0	1	0	1	310	46.7456	99.9291	0.07088	0.05	30	0.1333	0.00709821
1	0	0	0	0	0	0	0	1	1	350	38.8239	99.93	0.07004	0.05	30	0.1333	0.00582546
1	0	0	0	0	0	0	1	0	1	270	12.1401	99.7955	0.20451	0.05	30	0.1333	0.00531889
1	0	0	0	0	0	0	1	0	1	210	0.62229	97.2656	2.73435	0.05	30	0.1333	0.00364529
0	0	0	0	0	0	1	0	1	1	310	0.3746	94.2916	1.41956	0.05	30	0.1333	0.00113922
0	1	0	0	0	0	0	1	0	0.1	210	0	0	0	0.05	30	0.1333	0
0	1	0	0	0	0	0	1	0	0.1	230	0	0	0	0.05	30	0.1333	0
0	1	0	0	0	0	0	1	0	0.1	250	0	0	0	0.05	30	0.1333	0
0	1	0	0	0	0	0	1	0	0.1	270	0	0	0	0.05	30	0.1333	0
0	0	1	0	0	0	0	1	0	0.1	210	0	0	0	0.05	30	0.1333	0
0	0	1	0	0	0	0	1	0	0.1	230	0	0	0	0.05	30	0.1333	0
0	0	1	0	0	0	0	1	0	0.1	250	0	0	0	0.05	30	0.1333	0
0	0	1	0	0	0	0	1	0	0.1	270	0	0	0	0.05	30	0.1333	0
0	0	1	0	0	0	0	1	0	0.1	290	0	0	0	0.05	30	0.1333	0
0	0	1	0	0	0	0	1	0	0.5	210	0	0	0	0.05	30	0.1333	0
0	0	0	0	0	1	0	1	0	0.1	210	0	0	0	0.05	30	0.1333	0
0	0	0	0	0	1	0	1	0	0.1	230	0	0	0	0.05	30	0.1333	0
0	0	0	0	0	1	0	1	0	0.1	250	0	0	0	0.05	30	0.1333	0
0	0	0	0	0	1	0	1	0	0.1	270	0	0	0	0.05	30	0.1333	0
0	0	0	0	0	1	0	1	0	0.1	290	0	0	0	0.05	30	0.1333	0
0	0	0	0	0	1	0	1	0	0.1	310	0	0	0	0.05	30	0.1333	0
0	0	0	0	0	1	0	1	0	0.1	330	0	0	0	0.05	30	0.1333	0
1	0	0	0	0	0	0	0	1	0.1	210	0	0	0	0.05	30	0.1333	0
1	0	0	0	0	0	0	0	1	0.5	210	0.282062	100	0	0.05	30	0.1333	0
1	0	0	0	0	0	0	0	1	0.5	230	0.962864	100	0	0.05	30	0.1333	0
1	0	0	0	0	0	0	0	1	0.5	250	2.20391	100	0	0.05	30	0.1333	0
1	0	0	0	0	0	0	0	1	0.5	270	4.24387	100	0	0.05	30	0.1333	0
1	0	0	0	0	0	0	0	1	0.5	290	7.52302	100	0	0.05	30	0.1333	0
1	0	0	0	0	0	0	0	1	0.5	310	12.2698	100	0	0.05	30	0.1333	0
1	0	0	0	0	0	0	0	1	0.5	330	19.5008	99.8309	0.169095	0.05	30	0.1333	0.0141286
1	0	0	0	0	0	0	0	1	0.5	350	27.8374	99.846	0.154	0.05	30	0.1333	0.0183682
1	0	0	0	0	0	0	0	1	1	210	0.519041	100	0	0.05	30	0.1333	0
1	0	0	0	0	0	0	0	1	1	230	1.26002	100	0	0.05	30	0.1333	0
1	0	0	0	0	0	0	0	1	1	250	2.55904	100	0	0.05	30	0.1333	0
1	0	0	0	0	0	0	0	1	1	270	4.92212	100	0	0.05	30	0.1333	0
1	0	0	0	0	0	0	0	1	1	290	9.33639	100	0	0.05	30	0.1333	0
1	0	0	0	0	0	0	0	1	1	310	16.5485	100	0	0.05	30	0.1333	0
1	0	0	0	0	0	0	0	1	1	330	26.944	100	0	0.05	30	0.1333	0
0	1	0	0	0	0	0	0	1	0.1	210	0	0	0	0.05	30	0.1333	0
0	1	0	0	0	0	0	0	1	0.1	230	0	0	0	0.05	30	0.1333	0
0	1	0	0	0	0	0	0	1	0.1	250	0	0	0	0.05	30	0.1333	0
0	1	0	0	0	0	0	0	1	0.1	270	0	0	0	0.05	30	0.1333	0
0	1	0	0	0	0	0	0	1	0.1	290	0	0	0	0.05	30	0.1333	0
0	1	0	0	0	0	0	0	1	0.1	310	0	0	0	0.05	30	0.1333	0
0	1	0	0	0	0	0	0	1	0.1	330	0	0	0	0.05	30	0.1333	0
0	1	0	0	0	0	0	0	1	0.5	210	0	0	0	0.05	30	0.1333	0
0	1	0	0	0	0	0	0	1	0.5	230	0	0	0	0.05	30	0.1333	0
0	1	0	0	0	0	0	0	1	0.5	250	0	0	0	0.05	30	0.1333	0
0	1	0	0	0	0	0	0	1	0.5	270	0	0	0	0.05	30	0.1333	0
0	1	0	0	0	0	0	0	1	0.5	290	0	0	0	0.05	30	0.1333	0
0	1	0	0	0	0	0	0	1	0.5	310	0.132077	0	100	0.05	30	0.1333	0.0565903
0	1	0	0	0	0	0	0	1	0.5	330	0.27707	0	100	0.05	30	0.1333	0.118715
0	1	0	0	0	0	0	0	1	0.5	350	0.478033	0	100	0.05	30	0.1333	0.20482
0	1	0	0	0	0	0	0	1	1	210	0	0	0	0.05	30	0.1333	0
0	0	1	0	0	0	0	0	1	0.1	210	0	0	0	0.05	30	0.1333	0
0	0	1	0	0	0	0	0	1	0.1	230	0	0	0	0.05	30	0.1333	0
0	0	1	0	0	0	0	0	1	0.1	250	0	0	0	0.05	30	0.1333	0
0	0	1	0	0	0	0	0	1	0.1	270	0	0	0	0.05	30	0.1333	0
0	0	1	0	0	0	0	0	1	0.1	290	0	0	0	0.05	30	0.1333	0
0	0	1	0	0	0	0	0	1	0.1	310	0	0	0	0.05	30	0.1333	0
0	0	1	0	0	0	0	0	1	0.1	330	0	0	0	0.05	30	0.1333	0
0	0	1	0	0	0	0	0	1	0.1	350	0	0	0	0.05	30	0.1333	0
0	0	1	0	0	0	0	0	1	0.5	210	0	0	0	0.05	30	0.1333	0
0	0	1	0	0	0	0	0	1	0.5	230	0	0	0	0.05	30	0.1333	0
0	0	1	0	0	0	0	0	1	0.5	250	0	0	0	0.05	30	0.1333	0
0	0	1	0	0	0	0	0	1	0.5	270	0.128744	0	100	0.05	30	0.1333	0.0551622
0	0	1	0	0	0	0	0	1	0.5	290	0.298458	0	100	0.05	30	0.1333	0.127879
0	0	1	0	0	0	0	0	1	0.5	310	0.625074	0.0707625	99.9292	0.05	30	0.1333	0.267632
0	0	1	0	0	0	0	0	1	0.5	330	1.13643	0.0826292	99.9174	0.05	30	0.1333	0.486518
0	0	1	0	0	0	0	0	1	0.5	350	1.8217	0.0403484	99.9597	0.05	30	0.1333	0.780221
0	0	1	0	0	0	0	0	1	1	210	0	0	0	0.05	30	0.1333	0
0	0	1	0	0	0	0	0	1	1	230	0	0	0	0.05	30	0.1333	0
0	0	0	1	0	0	0	0	1	0.1	210	0	0	0	0.05	30	0.1333	0
0	0	0	1	0	0	0	0	1	0.5	210	0	0	0	0.05	30	0.1333	0
0	0	0	1	0	0	0	0	1	0.5	230	0.10523	3.95162	96.0484	0.05	30	0.1333	0.0433057
0	0	0	1	0	0	0	0	1	0.5	250	0.194766	5.75613	94.2439	0.05	30	0.1333	0.0786469
0	0	0	1	0	0	0	0	1	0.5	270	0.255077	8.19971	91.8003	0.05	30	0.1333	0.10033
0	0	0	1	0	0	0	0	1	0.5	290	0.403035	11.1158	88.8842	0.05	30	0.1333	0.153491
0	0	0	1	0	0	0	0	1	0.5	310	0.609359	14.5278	85.4722	0.05	30	0.1333	0.223158
0	0	0	1	0	0	0	0	1	0.5	330	0.827912	17.8344	82.1656	0.05	30	0.1333	0.291467
0	0	0	1	0	0	0	0	1	0.5	350	1.14044	21.2576	78.7424	0.05	30	0.1333	0.384764
0	0	0	0	1	0	0	0	1	0.5	210	0.709458	1.15015	98.8498	0.05	30	0.1333	0.300481
0	0	0	0	1	0	0	0	1	0.5	230	1.14334	1.245	98.755	0.05	30	0.1333	0.483781
0	0	0	0	1	0	0	0	1	0.5	250	1.81646	1.29312	98.7069	0.05	30	0.1333	0.768225
0	0	0	0	1	0	0	0	1	0.5	270	2.63028	1.32175	98.6783	0.05	30	0.1333	1.11208
0	0	0	0	1	0	0	0	1	0.5	290	3.99413	1.30724	98.6928	0.05	30	0.1333	1.68897
0	0	0	0	1	0	0	0	1	0.5	310	5.61369	1.38956	98.6104	0.05	30	0.1333	2.37184
0	0	0	0	1	0	0	0	1	0.5	330	7.73899	1.54059	98.4594	0.05	30	0.1333	3.2648
0	0	0	0	1	0	0	0	1	0.5	350	10.8392	1.86711	98.1329	0.05	30	0.1333	4.55748
0	0	0	0	0	1	0	0	1	0.1	210	0	0	0	0.05	30	0.1333	0
0	0	0	0	0	1	0	0	1	0.1	230	0	0	0	0.05	30	0.1333	0
0	0	0	0	0	1	0	0	1	0.1	250	0	0	0	0.05	30	0.1333	0
0	0	0	0	0	1	0	0	1	0.1	270	0	0	0	0.05	30	0.1333	0
0	0	0	0	0	1	0	0	1	0.1	290	0	0	0	0.05	30	0.1333	0
0	0	0	0	0	1	0	0	1	0.1	310	0	0	0	0.05	30	0.1333	0
0	0	0	0	0	1	0	0	1	0.1	330	0	0	0	0.05	30	0.1333	0
0	0	0	0	0	1	0	0	1	0.1	350	0	0	0	0.05	30	0.1333	0
0	0	0	0	0	1	0	0	1	0.5	210	0	0	0	0.05	30	0.1333	0
0	0	0	0	0	1	0	0	1	0.5	230	0	0	0	0.05	30	0.1333	0
0	0	0	0	0	1	0	0	1	0.5	250	0	0	0	0.05	30	0.1333	0
0	0	0	0	0	1	0	0	1	0.5	270	0	0	0	0.05	30	0.1333	0
0	0	0	0	0	1	0	0	1	0.5	290	0	0	0	0.05	30	0.1333	0
0	0	0	0	0	1	0	0	1	0.5	310	0	0	0	0.05	30	0.1333	0
0	0	0	0	0	1	0	0	1	0.5	330	0.144438	0	100	0.05	30	0.1333	0.0618863
0	0	0	0	0	1	0	0	1	0.5	350	0.149298	0	100	0.05	30	0.1333	0.0639691
0	0	0	0	0	1	0	0	1	1	210	0	0	0	0.05	30	0.1333	0
0	0	0	0	0	1	0	0	1	1	230	0	0	0	0.05	30	0.1333	0
0	0	0	0	0	1	0	0	1	1	250	0	0	0	0.05	30	0.1333	0
0	0	0	0	0	1	0	0	1	1	270	0	0	0	0.05	30	0.1333	0
0	0	0	0	0	0	1	0	1	0.1	210	0	0	0	0.05	30	0.1333	0
0	0	0	0	0	0	1	0	1	0.1	230	0	0	0	0.05	30	0.1333	0
0	0	0	0	0	0	1	0	1	0.1	250	0	0	0	0.05	30	0.1333	0
0	0	0	0	0	0	1	0	1	0.1	270	0	0	0	0.05	30	0.1333	0
0	0	0	0	0	0	1	0	1	0.1	290	0	0	0	0.05	30	0.1333	0
0	0	0	0	0	0	1	0	1	0.5	210	0	0	0	0.05	30	0.1333	0
0	0	0	0	0	0	1	0	1	0.5	230	0	0	0	0.05	30	0.1333	0
0	0	0	0	0	0	1	0	1	0.5	250	0	0	0	0.05	30	0.1333	0
0	0	0	0	0	0	1	0	1	0.5	270	0	0	0	0.05	30	0.1333	0
0	0	0	0	0	0	1	0	1	0.5	290	0.132056	89.4847	10.5153	0.05	30	0.1333	0.00594972
0	0	0	0	0	0	1	0	1	0.5	310	0.267784	71.295	28.705	0.05	30	0.1333	0.0329349
0	0	0	0	0	0	1	0	1	0.5	330	0.305899	65.1259	34.8741	0.05	30	0.1333	0.0457085
0	0	0	0	0	0	1	0	1	0.5	350	0.383444	56.2588	43.7412	0.05	30	0.1333	0.0718633
0	0	0	0	0	0	1	0	1	1	210	0	0	0	0.05	30	0.1333	0
0	0	0	0	0	0	1	0	1	1	230	0	0	0	0.05	30	0.1333	0
0	0	0	0	0	0	1	0	1	1	250	0	0	0	0.05	30	0.1333	0
0	0	0	0	0	0	1	0	1	1	270	0	0	0	0.05	30	0.1333	0
0	0	0	0	0	0	1	0	1	1	290	0.17389	100	0	0.05	30	0.1333	0
