# Supplementary material for: Machine learning assisted interfacial catalysis of metal-oxide nanocatalysts in CO2 hydrogenation
Source: Research Square preprint supplement (doi:10.21203/rs.3.rs-5884355/v1), 2025-02-05
Supplement: Supplementary file 3 [file e99c8f98d479d422eac99f02.xlsx]

## Sheet: Sheet1
YeildCO (molCO·gmetal-1·h-1)	εd,p (eV)	εd,m (eV)	de,p (|e|)	de,avg,m (|e|)	de,sum,m (|e|)	Qp (|e|)	Qavg,m (|e|)	Qsum,m (|e|)	CNp	CNm
26.35	-2.25	-4.06076	9	3.0641	3.0641	0	-0.29	-0.29	12	5
18.2014	-2.25	-4.06076	9	3.0641	3.0641	0	-0.29	-0.29	12	5
14.766	-1.41	-2.83412	7	1.25736	1.25736	0	-0.7519	-0.7519	12	6
14.4832	-1.73	-1.91152	8	2.38937	2.38937	0	-0.4844	-0.4844	12	6
13.7906	-1.83	-3.29615	10	1.31588	1.31588	0	-0.219	-0.219	12	6
11.4937	-2.25	-4.06076	9	3.0641	3.0641	0	-0.29	-0.29	12	5
11.2552	-2.25	-1.52213	9	2.15312	2.15312	0	0.1411	0.1411	12	2
11.1842	-1.83	-3.29615	10	1.31588	1.31588	0	-0.219	-0.219	12	6
10.6067	-2.25	-3.23526	9	9.03166	63.2216	0	-0.0233429	-0.1634	12	4.71429
9.51224	-1.73	-1.91152	8	2.38937	2.38937	0	-0.4844	-0.4844	12	6
9.38118	-1.41	-2.83412	7	1.25736	1.25736	0	-0.7519	-0.7519	12	6
8.6071	-2.25	-3.23526	9	9.03166	63.2216	0	-0.0233429	-0.1634	12	4.71429
8.1507	-2.25	-1.52213	9	2.15312	2.15312	0	0.1411	0.1411	12	2
8.1487	-1.83	-3.29615	10	1.31588	1.31588	0	-0.219	-0.219	12	6
7.02927	-2.25	-4.06076	9	3.0641	3.0641	0	-0.29	-0.29	12	5
6.87848	-1.83	-2.33959	10	2.25091	15.7564	0	-0.0416	-0.2912	12	4.42857
6.70206	-1.73	-1.91152	8	2.38937	2.38937	0	-0.4844	-0.4844	12	6
6.55565	-2.25	-3.23526	9	9.03166	63.2216	0	-0.0233429	-0.1634	12	4.71429
5.7925	-1.83	-3.29615	10	1.31588	1.31588	0	-0.219	-0.219	12	6
5.68423	-1.41	-2.83412	7	1.25736	1.25736	0	-0.7519	-0.7519	12	6
5.66527	-2.25	-1.52213	9	2.15312	2.15312	0	0.1411	0.1411	12	2
5.58013	-1.83	-2.33959	10	2.25091	15.7564	0	-0.0416	-0.2912	12	4.42857
5.38271	-2.25	-2.63175	9	5.72057	183.058	0	0	0	12	12
4.86326	-1.73	-1.91152	8	2.38937	2.38937	0	-0.4844	-0.4844	12	6
4.51796	-2.25	-3.23526	9	9.03166	63.2216	0	-0.0233429	-0.1634	12	4.71429
4.40653	-2.25	-2.63175	9	5.72057	183.058	0	0	0	12	12
4.28862	-1.83	-2.33959	10	2.25091	15.7564	0	-0.0416	-0.2912	12	4.42857
4.15696	-2.25	-4.06076	9	3.0641	3.0641	0	-0.29	-0.29	12	5
4.02479	-2.25	-1.52213	9	2.15312	2.15312	0	0.1411	0.1411	12	2
3.97159	-1.83	-1.97784	10	6.05468	193.75	0	0	0	12	12
3.90164	-1.83	-3.29615	10	1.31588	1.31588	0	-0.219	-0.219	12	6
3.71919	-2.67	-3.01699	10	5.34173	37.3921	0	-0.208129	-1.4569	12	4.71429
3.53362	-1.73	-1.91152	8	2.38937	2.38937	0	-0.4844	-0.4844	12	6
3.46722	-2.67	-2.20192	10	7.20081	230.426	0	0	0	12	12
3.35722	-2.25	-2.63175	9	5.72057	183.058	0	0	0	12	12
3.29811	-1.83	-0.555806	10	2.5355	2.5355	0	-0.0667	-0.0667	12	3
3.25879	-1.83	-1.97784	10	6.05468	193.75	0	0	0	12	12
3.18931	-1.83	-2.33959	10	2.25091	15.7564	0	-0.0416	-0.2912	12	4.42857
3.1788	-2.25	-2.63175	9	5.72057	183.058	0	0	0	12	12
3.12679	-1.41	-2.83412	7	1.25736	1.25736	0	-0.7519	-0.7519	12	6
2.97114	-2.25	-3.23526	9	9.03166	63.2216	0	-0.0233429	-0.1634	12	4.71429
2.58289	-1.83	-1.97784	10	6.05468	193.75	0	0	0	12	12
2.5755	-2.25	-1.52213	9	2.15312	2.15312	0	0.1411	0.1411	12	2
2.55414	-1.83	-0.555806	10	2.5355	2.5355	0	-0.0667	-0.0667	12	3
2.47186	-1.83	-3.29615	10	1.31588	1.31588	0	-0.219	-0.219	12	6
2.41904	-2.25	-4.06076	9	3.0641	3.0641	0	-0.29	-0.29	12	5
2.3741	-2.25	-2.63175	9	5.72057	183.058	0	0	0	12	12
2.34383	-2.25	-2.63175	9	5.72057	183.058	0	0	0	12	12
2.29563	-2.67	-2.20192	10	7.20081	230.426	0	0	0	12	12
2.29509	-2.67	-3.01699	10	5.34173	37.3921	0	-0.208129	-1.4569	12	4.71429
2.15399	-1.73	-1.91152	8	2.38937	2.38937	0	-0.4844	-0.4844	12	6
2.13809	-1.83	-2.33959	10	2.25091	15.7564	0	-0.0416	-0.2912	12	4.42857
1.92984	-1.83	-1.97784	10	6.05468	193.75	0	0	0	12	12
1.8307	-2.25	-3.23526	9	9.03166	63.2216	0	-0.0233429	-0.1634	12	4.71429
1.74739	-1.41	-2.83412	7	1.25736	1.25736	0	-0.7519	-0.7519	12	6
1.68615	-2.25	-2.63175	9	5.72057	183.058	0	0	0	12	12
1.65541	-1.83	-0.555806	10	2.5355	2.5355	0	-0.0667	-0.0667	12	3
1.57282	-2.25	-2.63175	9	5.72057	183.058	0	0	0	12	12
1.53663	-2.25	-1.52213	9	2.15312	2.15312	0	0.1411	0.1411	12	2
1.42113	-2.67	-3.01699	10	5.34173	37.3921	0	-0.208129	-1.4569	12	4.71429
1.37433	-1.83	-1.97784	10	6.05468	193.75	0	0	0	12	12
1.34921	-1.83	-2.33959	10	2.25091	15.7564	0	-0.0416	-0.2912	12	4.42857
1.34851	-2.67	-2.20192	10	7.20081	230.426	0	0	0	12	12
1.34023	-1.73	-1.91152	8	2.38937	2.38937	0	-0.4844	-0.4844	12	6
1.28998	-1.29	-1.48612	8	2.3013	16.1091	0	-0.132686	-0.9288	12	5
1.23385	-2.25	-4.06076	9	3.0641	3.0641	0	-0.29	-0.29	12	5
1.16565	-1.83	-0.555806	10	2.5355	2.5355	0	-0.0667	-0.0667	12	3
1.15722	-2.25	-2.63175	9	5.72057	183.058	0	0	0	12	12
1.15266	-1.41	-3.64997	7	3.13063	21.9144	0	-0.143443	-1.0041	12	4.71429
1.14192	-1.83	-3.29615	10	1.31588	1.31588	0	-0.219	-0.219	12	6
1.13555	-1.29	-1.48612	8	2.3013	16.1091	0	-0.132686	-0.9288	12	5
1.07112	-2.25	-3.23526	9	9.03166	63.2216	0	-0.0233429	-0.1634	12	4.71429
1.02072	-2.25	-1.52213	9	2.15312	2.15312	0	0.1411	0.1411	12	2
0.999855	-1.41	-3.64997	7	3.13063	21.9144	0	-0.143443	-1.0041	12	4.71429
0.967384	-1.41	-2.83412	7	1.25736	1.25736	0	-0.7519	-0.7519	12	6
0.947085	-1.29	-0.742847	8	2.66885	2.66885	0	-0.6715	-0.6715	12	6
0.93001	-2.25	-2.63175	9	5.72057	183.058	0	0	0	12	12
0.884223	-1.83	-1.97784	10	6.05468	193.75	0	0	0	12	12
0.837115	-1.29	-1.48612	8	2.3013	16.1091	0	-0.132686	-0.9288	12	5
0.787333	-1.83	-2.33959	10	2.25091	15.7564	0	-0.0416	-0.2912	12	4.42857
0.786293	-2.25	-2.63175	9	5.72057	183.058	0	0	0	12	12
0.773571	-1.83	-3.29615	10	1.31588	1.31588	0	-0.219	-0.219	12	6
0.749002	-2.67	-29.6243	10	0.946148	0.946148	0	-1.3963	-1.3963	12	6
0.74857	-1.83	-0.555806	10	2.5355	2.5355	0	-0.0667	-0.0667	12	3
0.733711	-2.67	-3.01699	10	5.34173	37.3921	0	-0.208129	-1.4569	12	4.71429
0.710073	-1.73	-1.91152	8	2.38937	2.38937	0	-0.4844	-0.4844	12	6
0.707471	-1.41	-3.64997	7	3.13063	21.9144	0	-0.143443	-1.0041	12	4.71429
0.707031	-1.17	-1.47838	7	5.18054	165.777	0	0	0	12	12
0.654095	-2.67	-2.20192	10	7.20081	230.426	0	0	0	12	12
0.625185	-2.67	-2.20192	10	7.20081	230.426	0	0	0	12	12
0.623404	-1.29	-0.742847	8	2.66885	2.66885	0	-0.6715	-0.6715	12	6
0.615296	-2.25	-4.06076	9	3.0641	3.0641	0	-0.29	-0.29	12	5
0.607665	-2.25	-3.23526	9	9.03166	63.2216	0	-0.0233429	-0.1634	12	4.71429
0.587979	-1.17	-1.19871	7	9.16627	64.1639	0	-0.163043	-1.1413	12	4.71429
0.581062	-1.41	-2.83412	7	1.25736	1.25736	0	-0.7519	-0.7519	12	6
0.578803	-1.17	-1.19871	7	9.16627	64.1639	0	-0.163043	-1.1413	12	4.71429
0.565773	-2.25	-1.52213	9	2.15312	2.15312	0	0.1411	0.1411	12	2
0.554505	-1.29	-1.32554	8	6.30473	201.751	0	0	0	12	12
0.546239	-1.29	-1.48612	8	2.3013	16.1091	0	-0.132686	-0.9288	12	5
0.531464	-2.25	-2.63175	9	5.72057	183.058	0	0	0	12	12
0.529132	-1.83	-1.97784	10	6.05468	193.75	0	0	0	12	12
0.523862	-1.17	-1.19871	7	9.16627	64.1639	0	-0.163043	-1.1413	12	4.71429
0.516202	-1.17	-1.47838	7	5.18054	165.777	0	0	0	12	12
0.487641	-2.25	-2.63175	9	5.72057	183.058	0	0	0	12	12
0.478631	-1.83	-0.555806	10	2.5355	2.5355	0	-0.0667	-0.0667	12	3
0.472378	-1.41	-3.64997	7	3.13063	21.9144	0	-0.143443	-1.0041	12	4.71429
0.459113	-1.17	-1.19871	7	9.16627	64.1639	0	-0.163043	-1.1413	12	4.71429
0.452795	-1.41	-2.41831	7	5.27255	189.812	0	0	0	12	12
0.441233	-1.17	-1.61416	7	2.57852	2.57852	0	-0.7929	-0.7929	12	6
0.435658	-1.83	-2.33959	10	2.25091	15.7564	0	-0.0416	-0.2912	12	4.42857
0.432729	-1.29	-0.742847	8	2.66885	2.66885	0	-0.6715	-0.6715	12	6
0.431072	-1.17	-1.47838	7	5.18054	165.777	0	0	0	12	12
0.428466	-2.67	-29.6243	10	0.946148	0.946148	0	-1.3963	-1.3963	12	6
0.419692	-2.67	-2.20192	10	7.20081	230.426	0	0	0	12	12
0.409605	-1.17	-1.47838	7	5.18054	165.777	0	0	0	12	12
0.366485	-1.29	-1.48612	8	2.3013	16.1091	0	-0.132686	-0.9288	12	5
0.365653	-2.67	-2.20192	10	7.20081	230.426	0	0	0	12	12
0.352993	-1.17	-1.19871	7	9.16627	64.1639	0	-0.163043	-1.1413	12	4.71429
0.349121	-2.67	-3.01699	10	5.34173	37.3921	0	-0.208129	-1.4569	12	4.71429
0.33054	-1.29	-1.32554	8	6.30473	201.751	0	0	0	12	12
0.325702	-1.29	-1.32554	8	6.30473	201.751	0	0	0	12	12
0.324906	-1.41	-0.469354	7	5.87808	5.87808	0	-0.2811	-0.2811	12	5
0.316739	-1.41	-2.41831	7	5.27255	189.812	0	0	0	12	12
0.309674	-1.41	-3.64997	7	3.13063	21.9144	0	-0.143443	-1.0041	12	4.71429
0.301579	-2.25	-2.63175	9	5.72057	183.058	0	0	0	12	12
0.296647	-1.83	-0.555806	10	2.5355	2.5355	0	-0.0667	-0.0667	12	3
0.292633	-1.29	-1.32554	8	6.30473	201.751	0	0	0	12	12
0.29244	-2.25	-2.63175	9	5.72057	183.058	0	0	0	12	12
0.290912	-1.29	-0.400334	8	9.36157	9.36157	0	-0.2501	-0.2501	12	5
0.287934	-1.41	-2.83412	7	1.25736	1.25736	0	-0.7519	-0.7519	12	6
0.285085	-1.83	-1.97784	10	6.05468	193.75	0	0	0	12	12
0.275403	-1.73	-1.75669	8	5.92193	41.4535	0	-0.0851286	-0.5959	12	4.71429
0.271904	-1.17	-1.47838	7	5.18054	165.777	0	0	0	12	12
0.263698	-1.29	-1.32554	8	6.30473	201.751	0	0	0	12	12
0.254786	-1.29	-0.742847	8	2.66885	2.66885	0	-0.6715	-0.6715	12	6
0.247948	-2.67	-2.20192	10	7.20081	230.426	0	0	0	12	12
0.236956	-1.83	-1.97784	10	6.05468	193.75	0	0	0	12	12
0.235137	-1.29	-1.48612	8	2.3013	16.1091	0	-0.132686	-0.9288	12	5
0.225673	-1.73	-1.75669	8	5.92193	41.4535	0	-0.0851286	-0.5959	12	4.71429
0.222441	-1.73	-1.75669	8	5.92193	41.4535	0	-0.0851286	-0.5959	12	4.71429
0.217676	-2.67	-29.6243	10	0.946148	0.946148	0	-1.3963	-1.3963	12	6
0.215176	-1.73	-1.75669	8	5.92193	41.4535	0	-0.0851286	-0.5959	12	4.71429
0.209124	-1.17	-1.19871	7	9.16627	64.1639	0	-0.163043	-1.1413	12	4.71429
0.205174	-1.73	-1.75669	8	5.92193	41.4535	0	-0.0851286	-0.5959	12	4.71429
0.203471	-1.29	-1.32554	8	6.30473	201.751	0	0	0	12	12
0.197421	-1.73	-2.03675	8	0.822528	0.822528	0	-0.1648	-0.1648	12	4
0.196193	-1.41	-2.41831	7	5.27255	189.812	0	0	0	12	12
0.195572	-1.41	-0.469354	7	5.87808	5.87808	0	-0.2811	-0.2811	12	5
0.193137	-1.73	-2.03675	8	0.822528	0.822528	0	-0.1648	-0.1648	12	4
0.18784	-1.41	-3.64997	7	3.13063	21.9144	0	-0.143443	-1.0041	12	4.71429
0.187169	-1.73	-1.75669	8	5.92193	41.4535	0	-0.0851286	-0.5959	12	4.71429
0.179801	-1.83	-1.97784	10	6.05468	193.75	0	0	0	12	12
0.179128	-1.29	-1.32554	8	6.30473	201.751	0	0	0	12	12
0.176188	-2.25	-2.63175	9	5.72057	183.058	0	0	0	12	12
0.175424	-1.73	-1.75669	8	5.92193	41.4535	0	-0.0851286	-0.5959	12	4.71429
0.16958	-2.67	-2.20192	10	7.20081	230.426	0	0	0	12	12
0.160518	-1.73	-1.75669	8	5.92193	41.4535	0	-0.0851286	-0.5959	12	4.71429
0.159299	-2.67	-3.01699	10	5.34173	37.3921	0	-0.208129	-1.4569	12	4.71429
0.157404	-1.73	-2.03675	8	0.822528	0.822528	0	-0.1648	-0.1648	12	4
0.15221	-1.17	-1.47838	7	5.18054	165.777	0	0	0	12	12
0.148617	-2.67	-2.20192	10	7.20081	230.426	0	0	0	12	12
0.143877	-1.29	-1.48612	8	2.3013	16.1091	0	-0.132686	-0.9288	12	5
0.143398	-1.73	-2.03675	8	0.822528	0.822528	0	-0.1648	-0.1648	12	4
0.142681	-1.83	-1.97784	10	6.05468	193.75	0	0	0	12	12
0.142464	-1.41	-0.469354	7	5.87808	5.87808	0	-0.2811	-0.2811	12	5
0.135925	-1.17	-1.19871	7	9.16627	64.1639	0	-0.163043	-1.1413	12	4.71429
0.112046	-1.83	-1.97784	10	6.05468	193.75	0	0	0	12	12
0.109603	-1.29	-1.32554	8	6.30473	201.751	0	0	0	12	12
0.109477	-1.29	-1.32554	8	6.30473	201.751	0	0	0	12	12
0.10777	-1.41	-3.64997	7	3.13063	21.9144	0	-0.143443	-1.0041	12	4.71429
0.095065	-1.41	-2.41831	7	5.27255	189.812	0	0	0	12	12
0.0901523	-1.29	-1.48612	8	2.3013	16.1091	0	-0.132686	-0.9288	12	5
0.0833902	-1.83	-1.97784	10	6.05468	193.75	0	0	0	12	12
0.0807805	-1.17	-1.47838	7	5.18054	165.777	0	0	0	12	12
0.0797682	-1.17	-1.19871	7	9.16627	64.1639	0	-0.163043	-1.1413	12	4.71429
0.0794817	-1.17	-1.47838	7	5.18054	165.777	0	0	0	12	12
0.0722712	-2.67	-2.20192	10	7.20081	230.426	0	0	0	12	12
0.0699186	-1.29	-1.32554	8	6.30473	201.751	0	0	0	12	12
0.0696469	-1.73	-2.03675	8	0.822528	0.822528	0	-0.1648	-0.1648	12	4
0.0694899	-2.67	-2.20192	10	7.20081	230.426	0	0	0	12	12
0.0683168	-1.41	-3.64997	7	3.13063	21.9144	0	-0.143443	-1.0041	12	4.71429
0.0683143	-2.67	-3.01699	10	5.34173	37.3921	0	-0.208129	-1.4569	12	4.71429
0.0626217	-1.29	-1.32554	8	6.30473	201.751	0	0	0	12	12
0.0609526	-1.41	-2.41831	7	5.27255	189.812	0	0	0	12	12
0.0563246	-1.41	-2.41831	7	5.27255	189.812	0	0	0	12	12
0.0501924	-1.17	-1.47838	7	5.18054	165.777	0	0	0	12	12
0.0497232	-1.73	-2.03675	8	0.822528	0.822528	0	-0.1648	-0.1648	12	4
0.0496179	-1.29	-1.32554	8	6.30473	201.751	0	0	0	12	12
0.0484721	-1.73	-2.03675	8	0.822528	0.822528	0	-0.1648	-0.1648	12	4
0.0460062	-1.83	-1.97784	10	6.05468	193.75	0	0	0	12	12
0.0455822	-2.67	-2.20192	10	7.20081	230.426	0	0	0	12	12
0.0362011	-1.17	-1.47838	7	5.18054	165.777	0	0	0	12	12
0.0351585	-1.41	-2.41831	7	5.27255	189.812	0	0	0	12	12
0.0351084	-1.17	-1.47838	7	5.18054	165.777	0	0	0	12	12
0.0336557	-1.29	-1.32554	8	6.30473	201.751	0	0	0	12	12
0.0335773	-2.67	-2.20192	10	7.20081	230.426	0	0	0	12	12
0.0311979	-1.73	-2.28499	8	5.53603	177.153	0	0	0	12	12
0.0311725	-1.29	-1.32554	8	6.30473	201.751	0	0	0	12	12
0.0287414	-1.17	-1.47838	7	5.18054	165.777	0	0	0	12	12
0.02769	-1.29	-1.32554	8	6.30473	201.751	0	0	0	12	12
0.0252242	-1.83	-1.97784	10	6.05468	193.75	0	0	0	12	12
0.0218328	-1.83	-1.97784	10	6.05468	193.75	0	0	0	12	12
0.019897	-1.41	-2.41831	7	5.27255	189.812	0	0	0	12	12
0.0190173	-1.41	-2.41831	7	5.27255	189.812	0	0	0	12	12
0.0155606	-1.73	-2.28499	8	5.53603	177.153	0	0	0	12	12
0.0138747	-1.41	-2.41831	7	5.27255	189.812	0	0	0	12	12
0.0103615	-1.73	-2.28499	8	5.53603	177.153	0	0	0	12	12
0.0084281	-1.73	-2.28499	8	5.53603	177.153	0	0	0	12	12
0.00739758	-1.73	-2.28499	8	5.53603	177.153	0	0	0	12	12
0.00709821	-1.73	-2.28499	8	5.53603	177.153	0	0	0	12	12
0.00582546	-1.73	-2.28499	8	5.53603	177.153	0	0	0	12	12
0.00531889	-1.73	-2.28499	8	5.53603	177.153	0	0	0	12	12
0.00364529	-1.73	-2.28499	8	5.53603	177.153	0	0	0	12	12
0.00113922	-1.41	-2.41831	7	5.27255	189.812	0	0	0	12	12
0	-1.29	-0.74	8	2.669	2.669	0	-0.67	-0.67	12	6
0	-1.29	-0.74	8	2.669	2.669	0	-0.67	-0.67	12	6
0	-1.29	-0.74	8	2.669	2.669	0	-0.67	-0.67	12	6
0	-1.29	-0.74	8	2.669	2.669	0	-0.67	-0.67	12	6
0	-2.67	-29.62	10	0.946	0.946	0	-1.4	-1.4	12	6
0	-2.67	-29.62	10	0.946	0.946	0	-1.4	-1.4	12	6
0	-2.67	-29.62	10	0.946	0.946	0	-1.4	-1.4	12	6
0	-2.67	-29.62	10	0.946	0.946	0	-1.4	-1.4	12	6
0	-2.67	-29.62	10	0.946	0.946	0	-1.4	-1.4	12	6
0	-2.67	-3.02	10	5.342	37.392	0	-0.208	-1.46	12	4.71
0	-1.17	-1.2	7	9.166	64.164	0	-0.163	-1.14	12	4.71
0	-1.17	-1.2	7	9.166	64.164	0	-0.163	-1.14	12	4.71
0	-1.17	-1.2	7	9.166	64.164	0	-0.163	-1.14	12	4.71
0	-1.17	-1.2	7	9.166	64.164	0	-0.163	-1.14	12	4.71
0	-1.17	-1.2	7	9.166	64.164	0	-0.163	-1.14	12	4.71
0	-1.17	-1.2	7	9.166	64.164	0	-0.163	-1.14	12	4.71
0	-1.17	-1.2	7	9.166	64.164	0	-0.163	-1.14	12	4.71
0	-1.73	-2.04	8	0.823	0.823	0	-0.16	-0.16	12	4
0	-1.73	-0.61	8	4.922	34.454	0	-0.019	-0.13	12	5.43
0	-1.73	-0.61	8	4.922	34.454	0	-0.019	-0.13	12	5.43
0	-1.73	-0.61	8	4.922	34.454	0	-0.019	-0.13	12	5.43
0	-1.73	-0.61	8	4.922	34.454	0	-0.019	-0.13	12	5.43
0	-1.73	-0.61	8	4.922	34.454	0	-0.019	-0.13	12	5.43
0	-1.73	-0.61	8	4.922	34.454	0	-0.019	-0.13	12	5.43
0.0141286	-1.73	-0.61	8	4.922	34.454	0	-0.019	-0.13	12	5.43
0.0183682	-1.73	-0.61	8	4.922	34.454	0	-0.019	-0.13	12	5.43
0	-1.73	-2.29	8	5.536	177.153	0	0	0	12	12
0	-1.73	-2.29	8	5.536	177.153	0	0	0	12	12
0	-1.73	-2.29	8	5.536	177.153	0	0	0	12	12
0	-1.73	-2.29	8	5.536	177.153	0	0	0	12	12
0	-1.73	-2.29	8	5.536	177.153	0	0	0	12	12
0	-1.73	-2.29	8	5.536	177.153	0	0	0	12	12
0	-1.73	-2.29	8	5.536	177.153	0	0	0	12	12
0	-1.29	-0.4	8	9.362	9.362	0	-0.25	-0.25	12	5
0	-1.29	-0.4	8	9.362	9.362	0	-0.25	-0.25	12	5
0	-1.29	-0.4	8	9.362	9.362	0	-0.25	-0.25	12	5
0	-1.29	-0.4	8	9.362	9.362	0	-0.25	-0.25	12	5
0	-1.29	-0.4	8	9.362	9.362	0	-0.25	-0.25	12	5
0	-1.29	-0.4	8	9.362	9.362	0	-0.25	-0.25	12	5
0	-1.29	-0.4	8	9.362	9.362	0	-0.25	-0.25	12	5
0	-1.29	-0.9	8	4.544	31.811	0	-0.066	-0.46	12	5.43
0	-1.29	-0.9	8	4.544	31.811	0	-0.066	-0.46	12	5.43
0	-1.29	-0.9	8	4.544	31.811	0	-0.066	-0.46	12	5.43
0	-1.29	-0.9	8	4.544	31.811	0	-0.066	-0.46	12	5.43
0	-1.29	-0.9	8	4.544	31.811	0	-0.066	-0.46	12	5.43
0.0565903	-1.29	-0.9	8	4.544	31.811	0	-0.066	-0.46	12	5.43
0.118715	-1.29	-0.9	8	4.544	31.811	0	-0.066	-0.46	12	5.43
0.20482	-1.29	-0.9	8	4.544	31.811	0	-0.066	-0.46	12	5.43
0	-1.29	-1.32	8	6.305	201.751	0	0	0	12	12
0	-2.67	-3.22	10	1.265	1.265	0	-0.54	-0.54	12	5
0	-2.67	-3.22	10	1.265	1.265	0	-0.54	-0.54	12	5
0	-2.67	-3.22	10	1.265	1.265	0	-0.54	-0.54	12	5
0	-2.67	-3.22	10	1.265	1.265	0	-0.54	-0.54	12	5
0	-2.67	-3.22	10	1.265	1.265	0	-0.54	-0.54	12	5
0	-2.67	-3.22	10	1.265	1.265	0	-0.54	-0.54	12	5
0	-2.67	-3.22	10	1.265	1.265	0	-0.54	-0.54	12	5
0	-2.67	-3.22	10	1.265	1.265	0	-0.54	-0.54	12	5
0	-2.67	-2.52	10	4.935	34.545	0	-0.082	-0.57	12	5.29
0	-2.67	-2.52	10	4.935	34.545	0	-0.082	-0.57	12	5.29
0	-2.67	-2.52	10	4.935	34.545	0	-0.082	-0.57	12	5.29
0.0551622	-2.67	-2.52	10	4.935	34.545	0	-0.082	-0.57	12	5.29
0.127879	-2.67	-2.52	10	4.935	34.545	0	-0.082	-0.57	12	5.29
0.267632	-2.67	-2.52	10	4.935	34.545	0	-0.082	-0.57	12	5.29
0.486518	-2.67	-2.52	10	4.935	34.545	0	-0.082	-0.57	12	5.29
0.780221	-2.67	-2.52	10	4.935	34.545	0	-0.082	-0.57	12	5.29
0	-2.67	-2.2	10	7.201	230.426	0	0	0	12	12
0	-2.67	-2.2	10	7.201	230.426	0	0	0	12	12
0	-1.83	-0.56	10	2.535	2.536	0	-0.07	-0.07	12	3
0	-1.83	-1.63	10	5.289	37.022	0	-0.01	-0.07	12	5.29
0.0433057	-1.83	-1.63	10	5.289	37.022	0	-0.01	-0.07	12	5.29
0.0786469	-1.83	-1.63	10	5.289	37.022	0	-0.01	-0.07	12	5.29
0.10033	-1.83	-1.63	10	5.289	37.022	0	-0.01	-0.07	12	5.29
0.153491	-1.83	-1.63	10	5.289	37.022	0	-0.01	-0.07	12	5.29
0.223158	-1.83	-1.63	10	5.289	37.022	0	-0.01	-0.07	12	5.29
0.291467	-1.83	-1.63	10	5.289	37.022	0	-0.01	-0.07	12	5.29
0.384764	-1.83	-1.63	10	5.289	37.022	0	-0.01	-0.07	12	5.29
0.300481	-2.25	-1.82	9	7.434	52.039	0	0.019	0.13	12	4.14
0.483781	-2.25	-1.82	9	7.434	52.039	0	0.019	0.13	12	4.14
0.768225	-2.25	-1.82	9	7.434	52.039	0	0.019	0.13	12	4.14
1.11208	-2.25	-1.82	9	7.434	52.039	0	0.019	0.13	12	4.14
1.68897	-2.25	-1.82	9	7.434	52.039	0	0.019	0.13	12	4.14
2.37184	-2.25	-1.82	9	7.434	52.039	0	0.019	0.13	12	4.14
3.2648	-2.25	-1.82	9	7.434	52.039	0	0.019	0.13	12	4.14
4.55748	-2.25	-1.82	9	7.434	52.039	0	0.019	0.13	12	4.14
0	-1.17	-0.86	7	2.574	2.574	0	-0.47	-0.47	12	5
0	-1.17	-0.86	7	2.574	2.574	0	-0.47	-0.47	12	5
0	-1.17	-0.86	7	2.574	2.574	0	-0.47	-0.47	12	5
0	-1.17	-0.86	7	2.574	2.574	0	-0.47	-0.47	12	5
0	-1.17	-0.86	7	2.574	2.574	0	-0.47	-0.47	12	5
0	-1.17	-0.86	7	2.574	2.574	0	-0.47	-0.47	12	5
0	-1.17	-0.86	7	2.574	2.574	0	-0.47	-0.47	12	5
0	-1.17	-0.86	7	2.574	2.574	0	-0.47	-0.47	12	5
0	-1.17	-0.63	7	4.756	33.294	0	-0.088	-0.62	12	5.43
0	-1.17	-0.63	7	4.756	33.294	0	-0.088	-0.62	12	5.43
0	-1.17	-0.63	7	4.756	33.294	0	-0.088	-0.62	12	5.43
0	-1.17	-0.63	7	4.756	33.294	0	-0.088	-0.62	12	5.43
0	-1.17	-0.63	7	4.756	33.294	0	-0.088	-0.62	12	5.43
0	-1.17	-0.63	7	4.756	33.294	0	-0.088	-0.62	12	5.43
0.0618863	-1.17	-0.63	7	4.756	33.294	0	-0.088	-0.62	12	5.43
0.0639691	-1.17	-0.63	7	4.756	33.294	0	-0.088	-0.62	12	5.43
0	-1.17	-1.48	7	5.181	165.777	0	0	0	12	12
0	-1.17	-1.48	7	5.181	165.777	0	0	0	12	12
0	-1.17	-1.48	7	5.181	165.777	0	0	0	12	12
0	-1.17	-1.48	7	5.181	165.777	0	0	0	12	12
0	-1.41	-0.47	7	5.878	5.878	0	-0.28	-0.28	12	5
0	-1.41	-0.47	7	5.878	5.878	0	-0.28	-0.28	12	5
0	-1.41	-0.47	7	5.878	5.878	0	-0.28	-0.28	12	5
0	-1.41	-0.47	7	5.878	5.878	0	-0.28	-0.28	12	5
0	-1.41	-0.47	7	5.878	5.878	0	-0.28	-0.28	12	5
0	-1.41	-1.73	7	3.997	27.981	0	-0.051	-0.36	12	4.71
0	-1.41	-1.73	7	3.997	27.981	0	-0.051	-0.36	12	4.71
0	-1.41	-1.73	7	3.997	27.981	0	-0.051	-0.36	12	4.71
0	-1.41	-1.73	7	3.997	27.981	0	-0.051	-0.36	12	4.71
0.00594972	-1.41	-1.73	7	3.997	27.981	0	-0.051	-0.36	12	4.71
0.0329349	-1.41	-1.73	7	3.997	27.981	0	-0.051	-0.36	12	4.71
0.0457085	-1.41	-1.73	7	3.997	27.981	0	-0.051	-0.36	12	4.71
0.0718633	-1.41	-1.73	7	3.997	27.981	0	-0.051	-0.36	12	4.71
0	-1.41	-2.42	7	5.273	189.812	0	0	0	12	12
0	-1.41	-2.42	7	5.273	189.812	0	0	0	12	12
0	-1.41	-2.42	7	5.273	189.812	0	0	0	12	12
0	-1.41	-2.42	7	5.273	189.812	0	0	0	12	12
0	-1.41	-2.42	7	5.273	189.812	0	0	0	12	12
