# Supplementary material for: Machine learning assisted interfacial catalysis of metal-oxide nanocatalysts in CO2 hydrogenation
Source: Research Square preprint supplement (doi:10.21203/rs.3.rs-5884355/v1), 2025-02-05
Supplement: Supplementary file 4 [file f34d07c98cb3888cd0dd3b93.xlsx]

## Sheet: Sheet1
Supported metals	Supports	Metal loadings / wt.%	Temperature / oC	CO2 conversion / %	CH4 selectivity / %	CO selectivity / %	Mass of catalyst (g)	Total flow rate (mL/min)	CO2 contents (%)	YeildCO (molCO·gmetal-1·h-1)
Pd	CeO2	0.3	210	0.73524	0	100	0.05	30	0.1333	0.52504
Pd	CeO2	0.3	230	1.21708	0.1118	99.8882	0.05	30	0.1333	0.868154
Pd	CeO2	0.3	250	2.13988	0.27038	99.7296	0.05	30	0.1333	1.52397
Pd	CeO2	0.3	270	3.51833	0.51903	99.481	0.05	30	0.1333	2.49942
Pd	CeO2	0.3	290	5.37482	0.9704	99.0296	0.05	30	0.1333	3.80095
Pd	CeO2	0.3	310	7.72675	1.77853	98.2215	0.05	30	0.1333	5.41959
Pd	CeO2	0.3	330	9.9321	2.73514	97.2649	0.05	30	0.1333	6.89859
Pd	CeO2	0.3	350	11.7782	2.67194	97.3281	0.05	30	0.1333	8.18616
Pd	CeO2	0.7	210	1.17431	0.07417	99.9258	0.05	30	0.1333	0.359126
Pd	CeO2	0.7	230	2.12375	0.19919	99.8008	0.05	30	0.1333	0.64867
Pd	CeO2	0.7	250	3.67559	0.36184	99.6382	0.05	30	0.1333	1.12083
Pd	CeO2	0.7	270	6.01875	0.63885	99.3611	0.05	30	0.1333	1.83025
Pd	CeO2	0.7	290	8.87221	1.22224	98.7778	0.05	30	0.1333	2.68212
Pd	CeO2	0.7	310	11.798	2.2864	97.7136	0.05	30	0.1333	3.52817
Pd	CeO2	0.7	330	15.4583	3.899	96.101	0.05	30	0.1333	4.54649
Pd	CeO2	0.7	350	18.9177	5.04029	94.9597	0.05	30	0.1333	5.49788
Pd	CeO2	0.9	210	1.21419	0.05325	99.9467	0.05	30	0.1333	0.288867
Pd	CeO2	0.9	230	2.12301	0.18357	99.8164	0.05	30	0.1333	0.504425
Pd	CeO2	0.9	250	3.60659	0.34899	99.651	0.05	30	0.1333	0.855501
Pd	CeO2	0.9	270	5.73783	0.64491	99.3551	0.05	30	0.1333	1.357
Pd	CeO2	0.9	290	8.79111	1.16513	98.8349	0.05	30	0.1333	2.06822
Pd	CeO2	0.9	310	11.8365	2.23696	97.763	0.05	30	0.1333	2.75448
Pd	CeO2	0.9	330	15.5057	3.89737	96.1026	0.05	30	0.1333	3.54706
Pd	CeO2	0.9	350	19.7033	6.13666	93.8633	0.05	30	0.1333	4.40227
